# Supplementary material for: Dissecting surveying behavior of reactive microglia under chronic neurodegeneration
Source: eLife. 2026 Jan 8;14:RP107650. doi: 10.7554/eLife.107650 (PMC12782555; doi:10.7554/eLife.107650)
Supplement: Source data 1. [file elife-107650-data1.xlsx]

## Sheet: Fig1 - S1e
3D17 integrated density, AU
WT	WT	Cx3cr1/EGFP	Cx3cr1/EGFP
Normal	SSLOW	Normal	SSLOW
50021	25322492	609704	11793756
175173	15737752	214698	11687932
1000787	21940487	493524	16757511

## Sheet: FIGURE 2a
	MEAN SPEED	Mkm/min
	Normal	Sub-Clinical	Early Clinical	Advanced
	0.154686	0.137413	0.0867556	0.171924
	0.0976963	0.070895	0.24777	0.110982
	0.11648	0.114566	0.145653	0.145227
	0.0802171	0.173506	0.12006	0.317303
	0.0892848	0.177998	0.348126	0.31055
	0.0754646	0.132576	0.132324	0.11436
	0.23561	0.173286	0.152327	0.325821
	0.0918372	0.122776	0.260344	0.129692
	0.115866	0.134711	0.310644	0.0898489
	0.0807094	0.196446	0.27238	0.121777
	0.15566	0.21953	0.14278	0.165085
	0.0631325	0.122809	0.376273	0.0923085
	0.0823213	0.237337	0.262418	0.125658
	0.315535	0.137137	0.134871	0.120349
	0.115002	0.228213	0.0961549	0.156548
	0.0913846	0.36502	0.427956	0.0900923
	0.11323	0.11566	0.169548	0.0719246
	0.103848	0.244663	0.295271	0.108025
	0.227183	0.141176	0.263054	0.2642
	0.0712653	0.186381	0.20232	0.131448
	0.10842	0.192516	0.284047	0.468677
	0.131086	0.0998007	0.261069	0.251475
	0.147654	0.0890571	0.306061	0.182511
	0.0653974	0.178237	0.128842	0.112945
	0.168241	0.0753461	0.0763887	0.192084
	0.0864443	0.270446	0.339299	0.26537
	0.0722329	0.177416	0.246884	0.417249
	0.0888724	0.0884368	0.224233	0.144923
	0.124056	0.0803761	0.314087	0.177971
	0.120111	0.150604	0.155321	0.301287
	0.0682269	0.150777	0.207098	0.108585
	0.0967985	0.177022	0.361078	0.148842
	0.164432	0.0810908	0.136502	0.129879
	0.106842	0.10841	0.104777	0.104142
	0.106755	0.161886	0.0838266	0.19295
	0.145536	0.136964	0.119774	0.173943
	0.0788685	0.232056	0.206527	0.333946
	0.0705286	0.166397	0.264992	0.118265
	0.13646	0.112568	0.114664	0.252032
	0.291974	0.139242	0.213463	0.168062
	0.0599427	0.136441	0.08784	0.371265
	0.0706956	0.170231	0.0787896	0.117282
	0.152511	0.134228	0.212565	0.145071
	0.16234	0.112647	0.382032	0.17828
	0.135188	0.13751	0.163014	0.137541
	0.112953	0.13686	0.201783	0.123784
	0.145465	0.136802	0.0963261	0.167305
	0.237563	0.275984	0.338521	0.24771
	0.166222	0.140929	0.298455	0.135568
	0.167166	0.130849	0.234009	0.434972
	0.155914	0.273863	0.289724	0.132585
	0.100932	0.101084	0.139203	0.127817
	0.123483	0.258945	0.294232	0.51583
	0.126876	0.132519	0.15535	0.224303
	0.187221	0.212691	0.152387	0.11371
	0.306903	0.360075	0.128056	0.105814
	0.249624	0.149234	0.109329	0.123629
	0.196022	0.300353	0.135052	0.173059
	0.139845	0.158893	0.147288	0.217509
	0.135247	0.249502	0.168868	0.126589
	0.164703	0.12514	0.156741	0.157877
	0.155316	0.24289	0.237784	0.214381
	0.221989	0.358645	0.130316	0.155633
	0.209125	0.216551	0.147654	0.430238
	0.169698	0.22605	0.135715	0.147484
	0.177738	0.293103	0.174851	0.125634
	0.134373	0.128938	0.0896176	0.185528
	0.151817	0.338404	0.144643	0.153609
	0.166145	0.160391	0.170959	0.181625
	0.155527	0.267054	0.126531	0.158376
	0.138735	0.133462	0.10556	0.129629
	0.139661	0.218339	0.247538	0.143172
	0.153916	0.261366	0.184725	0.155787
	0.184421		0.295414	0.179674
	0.169135		0.252346	0.0816774
	0.138531			0.114791
	0.181653			0.213601
	0.131455			0.365559
	0.189555			0.34732
	0.303545			0.256006
	0.107669			0.110939
	0.241687			0.12026
				0.332956
				0.21777
				0.139968
				0.0948506
				0.165203
				0.300222
				0.253556
				0.507333
				0.208237

## Sheet: FIGURE 2b
	TOTAL DISTANCE	(Mkm)
	Normal	Sub-Clinical	Early Clinical	Advanced
	23.2029	24.0472	15.1822	19.7713
	17.0968	12.4066	43.3597	19.4219
	20.384	20.049	25.4893	25.4147
	14.038	30.3635	21.0105	55.5281
	15.6248	31.1497	60.9221	49.9126
	13.2063	23.2009	23.1567	20.0129
	34.1634	30.325	26.6573	57.0186
	16.0715	21.4857	45.5602	22.6961
	20.2765	23.5745	54.3627	15.7236
	14.1241	34.378	47.6666	21.311
	27.2406	38.4178	24.9865	28.8898
	11.0482	21.4915	65.8479	16.154
	14.4062	41.534	48.7205	21.9902
	55.2186	23.999	23.6023	21.061
	20.1253	39.9372	16.8271	27.3958
	15.9923	63.8784	73.9308	15.7661
	19.8152	20.2406	29.6709	12.5868
	18.1734	42.816	51.6724	18.9044
	39.757	24.7059	44.8568	46.235
	12.4714	32.6167	35.9013	23.0034
	18.9735	33.6903	51.7219	82.0185
	23.1665	17.4651	45.687	44.0082
	25.8395	15.585	52.0304	31.9394
	11.4445	29.4091	22.5473	19.7654
	24.6426	13.1856	13.368	33.6147
	15.1277	47.328	59.3774	46.8037
	12.6408	31.0478	44.5667	70.9323
	15.5527	15.4764	39.2407	24.6369
	21.7098	14.0658	57.5067	22.2464
	21.0195	26.3557	27.1812	43.6866
	11.9397	26.3859	36.2422	11.4014
	16.9397	30.9789	61.3833	26.0473
	28.7755	14.1909	19.1102	22.7289
	9.80859	18.9718	16.2404	18.2248
	11.7431	28.33	14.6697	33.7663
	23.2858	23.9688	20.9604	30.4401
	8.2812	40.6098	36.1423	58.4406
	10.9319	29.1194	46.3737	20.6964
	21.1512	17.2948	20.0662	40.3252
	47.9403	24.3673	32.759	29.4109
	43.7961	23.8772	15.372	61.2587
	8.99141	29.7904	13.7882	20.5243
	9.1006	23.4899	37.1989	25.3875
	12.2009	19.7132	43.9337	31.199
	28.4096	24.0642	28.5274	24.0696
	23.6579	23.9505	35.312	21.6623
	19.7668	17.3604	16.8571	18.4036
	25.4564	48.2973	59.2412	43.3493
	41.5736	24.6626	52.2297	23.7244
	29.0889	22.2443	40.9515	76.1201
	29.2541	26.017	50.7017	23.2024
	17.9301	17.6897	24.3605	22.368
	11.775	45.3153	42.6636	29.1594
	14.818	23.1909	27.1863	19.8993
	37.0327	37.2209	26.6678	18.5174
	22.2033	63.2777	22.4098	21.6351
	32.7636	26.1159	19.1326	30.2853
	37.6854	52.6571	23.6341	36.9766
	43.6843	27.8063	25.7755	22.1531
	34.3038	43.6628	29.5519	27.6284
	24.4729	21.8994	27.4296	32.1572
	23.6683	42.5057	41.6122	22.6762
	28.823	62.7629	22.8053	83.6052
	27.1803	28.5926	25.8394	25.8096
	38.848	39.5588	23.7501	21.986
	30.3231	51.293	30.5989	32.4673
	29.6972	22.5641	15.6831	26.8816
	31.1042	59.2208	25.3125	15.4381
	23.5153	28.0684	18.8055	27.7158
	26.568	46.7345	22.1429	22.6851
	29.0754	23.3559	17.9453	25.0552
	27.2172	34.9343	39.606	26.4838
	24.2786	72.2082	24.9379	28.7479
	24.4407	30.057	51.6974	8.16774
	26.9354		44.1605	20.0884
	32.2736			37.3803
	29.5986			63.9729
	24.2429			60.781
	31.7892			44.801
	23.0045			19.4144
	24.6421			21.0454
	50.0849			58.2673
	15.0737			38.1098
	22.1758			24.4944
				16.5989
				28.9106
				52.5389
				44.3723
				88.7832
				23.9472

## Sheet: FIGURE 2d
		PRINCIPLE COMPONENT ANALYSIS OF MOBILITY PARAMETERS
			Length	Accumulated distance	Euclidean distance	Displacement	Straight line speed	Linearity of forward progression	Mean speed	Velocity
		Normal 1	23.4528	24.9518	12.9848	12.4692	0.0346365	0.221923	0.14153	0.0712908
		Normal 2	25.6537	27.466	11.4482	11.9016	0.0335256	0.201972	0.167262	0.0784743
		Normal 3	31.4359	21.8048	11.3991	10.8568	0.0311685	0.211036	0.150577	0.0622994
		Sub clinical 1	41.8084	44.106	20.6916	21.8221	0.0591906	0.275029	0.197138	0.124242
		Sub clinical 2	53.5758	56.4842	29.5335	28.6412	0.0724799	0.265961	0.261999	0.15911
		Sub clinical 3	73.1073	72.2365	30.307	31.159	0.0906289	0.23506	0.328296	0.203483
		Early Clinical 1	72.1207	72.0179	38.123	36.896	0.10686	0.367141	0.298316	0.205766
		Early Clinical 2	62.5195	63.9313	34.1837	35.2897	0.10369	0.398114	0.255359	0.182661
		Early Clinical 3	75.8743	75.4982	38.1854	39.433	0.112915	0.431497	0.280496	0.215709
		Advanced 1	96.0453	91.3889	52.1829	53.3362	0.154571	0.463153	0.336416	0.261111
		Advanced 2	132.845	171.013	85.0809	79.0266	0.23154	0.427153	0.552375	0.488608
		Advanced 3	91.1238	86.6434	46.7924	44.9558	0.128445	0.40999	0.342991	0.247553

## Sheet: Fig2-S1b
3D17 integrated density, AU
Non-infected	Sub-clinical	Early clinical	Advanced
186656	6016361	17816501	32869880
924393	6429674	12229126	35885342
1791684	8939672	9947478	34773428

## Sheet: FIG2-S2
	NORMAL	DISTANCE	(Mkm)						SUB-CLINICAL	DISTANCE	(Mkm)						EARLY-CLINICAL	DISTANCE	(Mkm)
	0 -1 hr	1 - 2 hr	2 -3 hr	3 - 4 hr	4 - 5 hr	5 - 6 hr			0 -1 hr	1 - 2 hr	2 -3 hr	3 - 4 hr	4 - 5 hr	5 - 6 hr			0 -1 hr	1 - 2 hr	2 -3 hr	3 - 4 hr	4 - 5 hr	5 - 6 hr
	8.11008	12.0249	7.94297	9.02574	4.95013	4.91817			14.104	27.5845	37.7309	11.4138	6.3494	11.9703			20.7755	13.2168	3.15132	7.82328	8.43827	4.254
	13.7075	11.3102	8.68347	3.12113	9.76018	6.79278			18.0233	3.90483	6.68191	6.80448	8.13514	5.74272			10.0781	14.9419	6.00717	2.60585	7.35879	11.2457
	10.846	12.5701	14.0523	12.3061	4.44088	9.74914			9.24875	3.65755	12.5547	15.5644	9.07119	2.91126			8.66971	4.79872	5.71115	13.5439	19.3108	10.8247
	9.63314	8.52798	4.1472	3.20979	4.07721	4.44692			5.02434	11.794	9.30732	4.51262	6.45631	14.4918			29.6687	6.16245	21.8427	13.7905	6.17639	7.83561
	8.52268	7.6057	9.02102	14.9159	2.94757	6.19503			18.5202	6.81639	27.8477	12.8719	5.86967	14.2099			9.481	14.3256	39.9839	5.82244	6.21115	4.36274
	5.64368	7.87647	5.80057	4.38348	5.07083	5.99726			8.05459	12.6383	15.3696	5.78331	9.42365	3.12105			7.41452	4.73406	7.16312	4.8158	11.6857	9.24533
	5.59753	3.61599	10.6412	2.73131	6.89492	5.2774			11.9432	13.89	8.35568	3.85938	9.45939	3.57478			10.7563	19.2925	5.82152	5.82478	9.65212	6.25959
	6.87752	9.148	12.205	15.4537	6.59478	8.9466			12.8709	10.7754	12.477	10.7285	4.12341	6.25096			13.0634	16.1817	20.1717	2.88274	11.1218	14.0326
	7.51328	8.38287	4.65668	5.81091	8.27377	5.01358			6.76255	2.73444	4.39699	4.71542	5.18379	2.74321			26.2441	5.56152	13.8639	13.2422	11.6261	3.43518
	8.24758	6.8504	7.46717	4.86918	4.48325	9.29505			4.43555	6.8841	20.5369	16.0077	9.99673	6.2194			10.6592	39.1484	3.81593	16.3266	10.3294	8.79105
	12.4476	7.1677	10.1396	6.76725	4.208	4.16398			7.10133	6.3028	18.7939	10.5001	12.5417	8.87048			31.3455	15.9927	6.84492	7.88811	9.84687	4.50345
	11.3171	6.50142	4.83642	14.0651	6.44951	7.54218			8.62884	6.17577	36.54	7.67567	8.05496	12.9964			13.7222	3.65879	4.83389	12.4537	3.88724	2.38133
	7.63328	8.34653	3.30992	3.60738	4.62867	3.69627			8.18823	7.39395	21.5815	7.87958	15.1755	11.0001			9.37298	12.049	12.3019	6.07245	6.31297	12.9779
	9.60967	2.76644	12.0232	6.29503	4.25133	4.41924			14.1397	3.10288	7.45842	6.37925	4.61323	12.3105			13.344	5.42804	2.77039	5.5735	4.25974	5.02034
	12.0281	4.91797	5.98241	13.1769	5.18795	9.77698			12.5337	23.2759	13.5867	5.22547	10.6658	11.1851			4.50356	13.6428	6.59169	6.07619	9.11273	6.67388
	13.0764	6.3131	6.6931	10.9462	5.0611	8.45674			13.1351	8.27647	39.2832	10.8263	5.7075	6.68655			13.6545	9.18042	9.05971	20.2279	14.9205	8.63347
	7.43516	4.79309	3.17954	9.92667	4.75324	7.12484			4.94318	15.6051	12.6341	22.6943	12.1684	4.24831			20.0169	7.5069	13.41	8.32552	11.4628	8.39906
	6.90079	11.7611	7.82944	9.79364	4.40985	7.7847			15.9636	8.9832	27.1856	8.18497	3.22412	4.95867			9.36226	6.48559	7.42089	25.2664	6.35329	19.9664
	8.75121	5.2114	5.17949	8.43418	5.58446	9.36249			6.44787	5.16604	24.8638	6.72514	8.94773	6.44625			6.86827	11.4064	9.25132	5.00719	2.49133	4.53448
	11.5223	4.40515	4.1472	9.72582	8.43122	6.34604			11.6434	29.7475	16.6174	2.66903	4.02772	8.55417			7.71255	4.52936	8.61777	5.90576	17.2652	4.62595
	14.0593	2.93148	10.0203	7.13242	6.40318	7.48288			7.19509	3.06842	7.42379	2.98262	4.38596	2.87803			31.6064	4.25551	5.44596	6.19096	3.26029	4.58033
	10.1716	10.9702	3.3824	3.54843	9.77813	6.73998			9.48004	7.28097	14.0439	7.48502	5.25294	7.86835			18.6167	4.23156	8.88953	10.4719	18.9621	8.51768
	6.48323	9.16389	10.1587	9.87465	8.93513	6.07449			18.3921	10.5221	7.10705	13.6565	16.5968	9.29028			16.3545	4.59189	18.5492	16.6353	17.2981	9.11614
	13.3255	6.17067	14.7605	5.26193	5.59404	5.23351			11.9605	4.48836	7.43935	3.66265	4.31789	7.23379			48.2414	4.29543	15.4793	9.6645	8.00923	11.2908
	5.08343	5.80846	12.3132	6.09468	3.41754	9.51673			14.8317	16.8723	17.9275	4.78487	17.1067	6.1823			18.7474	8.01581	12.0649	6.55684	17.1185	3.06068
	9.11974	4.79002	12.1773	6.59289	7.73743	7.75913			9.11062	23.9826	11.588	2.9043	6.16819	4.49133			12.0615	17.3209	6.87749	9.36533	9.00378	13.9739
	6.35843	6.50129	14.7815	5.38437	8.73985	7.28573			10.648	2.71557	20.8703	7.89577	4.73824	6.09435			27.144	34.943	4.10661	24.3892	9.5398	9.76853
	7.39209	6.95735	14.9121	12.6919	5.30469	7.98676			3.73014	5.40029	4.78487	4.78714	2.91726	6.19525			7.94899	33.1451	5.05598	14.2711	11.8486	5.57476
	4.69852	3.70399	11.0727	9.38662	4.02234	4.01437			15.8171	13.5801	4.78714	4.41129	3.6646	9.12315			14.9352	21.8991	6.34059	5.87813	8.72613	5.38709
	12.0411	7.31821	11.6401	9.92506	7.02858	5.92292			6.859	9.96476	10.9455	11.0347	5.73262	11.8484			8.71362	10.9664	8.62439	5.62414	5.5961	6.34445
	5.25992	8.45249	8.12815	4.42183	6.80519	4.9664			6.84723	5.41983	3.72829	3.88142	8.45673	4.36562			7.75025	10.5187	9.94368	18.9165	10.586	17.468
	6.65038	6.29029	13.5314	13.405	7.64956	6.38482			6.20318	13.9264	4.06597	6.0921	6.94836	8.03603			16.1225	18.174	16.6586	8.68875	5.22919	19.1663
	4.77519	6.58456	5.80448	4.37565	5.24796	8.90095			5.79141	2.44077	9.17843	4.02519	3.79373	7.63499			7.62449	4.12136	6.13851	9.78321	6.49563	8.03358
	6.05259	6.04294	3.98729	6.33807	5.46719	6.44318			9.49619	5.49946	7.40191	11.8701	4.60147	6.91724			25.4571	12.5013	11.6842	23.4111	4.36634	7.83931
	6.83895	11.7071	13.8469	9.3701	5.94959	4.47965			10.1688	9.45826	3.66206	6.41407	7.6706	8.46459			4.93489	11.9673	14.5643	12.515	6.61598	6.20445
	14.8991	8.41864	10.7155	13.1329	6.74799	5.64163			4.10785	4.98737	11.8555	5.5917	4.41723	7.72466			9.28819	5.86754	5.81914	12.0177	7.42233	10.2766
	10.2695	6.41104	10.2821	7.60485	6.99046	4.55066			21.806	18.4076	8.46975	2.9421	5.67271	2.60481			16.5712	10.462	8.54176	3.68295	11.1202	7.04212
	10.1158	5.89667	5.08995	9.97175	8.77843	6.36393			17.43	7.39638	4.20927	6.38589	14.6515	12.5432			7.47708	13.8816	14.2239	5.32203	13.7811	7.34335
	4.66906	9.08576	8.65848	4.55737	5.48151	5.79498			7.14977	3.11953	3.50707	3.8186	5.50911	8.25141			24.7477	5.75751	7.79946	10.4787	5.61316	6.84135
	13.5045	12.1566		9.77583	6.32519	4.52522			3.82976	7.19618	3.26998	8.3648	3.64009	11.2364			11.4804	13.3135	20.3623	19.184	3.38419	6.60693
	14.0927	10.5229		8.89105	5.51171	5.14199			5.52189	5.66301	7.51233	3.68598	4.14947	6.87708			6.19543	2.81653	13.9696	10.8088	5.02128	5.50196
	12.3651	8.44606		9.93235	6.44318	5.52556			5.68606	4.92804	3.51257	7.64345	7.36798	12.5549			8.15644	8.97529	7.55521	4.56127	5.51078	10.4836
	14.0219	7.90848		7.95883	4.9664	3.6995			3.90768	6.20472	4.13792	5.98613	3.07217	7.81915			5.35468	11.2292	11.4538	14.5301	9.35963	7.03888
	11.0048	13.9307		8.15891	6.38482	3.59961			7.7545	23.8914	9.29766	4.15881	7.20915	10.1754			7.41811	23.6564	6.80068	8.0954	7.66957	8.22184
	13.7546	6.97735		8.4199	5.14199				15.2587	3.32623	8.30143	9.43245	7.72062	4.79199			10.5698	7.88292	27.3648	8.69404	8.42951	6.16012
	10.2398			12.9591	8.9144				5.78541	8.97152	5.45337	4.49334	8.73336	7.35146			10.6435	4.53435	8.43603	12.9075	5.88026	5.68449
	8.06448			12.6172	4.55066				8.39374	3.79058	10.7394	9.25076	5.83694	4.26981			7.34262	7.95132	6.06594	5.87225	5.61083	6.5403
	11.0581			8.23062	6.14097				8.80703	4.82861	5.56998	6.02081	10.5725	8.22592			6.46996	6.69696	8.77845	7.52287	6.1935	7.39139
	9.42048			11.133	8.63881				8.47393	3.24334	12.5407	6.68827	7.95776	8.47615			5.18337	7.62219	10.7413	7.30144	9.68829	7.68851
	7.36596			9.87949	5.79498				11.9898	3.14051	8.65429	8.2781	7.93408	3.69029			13.1344	6.67693	19.4822	10.1098	17.341	4.54436
	4.22984			6.3028	6.36393				11.2844	10.7161	6.74585	4.79842	15.6474	11.9225			7.84647	5.86095	13.9765	8.58263	10.2842	6.69564
	5.59067			5.99907	5.05514				8.6571	4.11383	2.74214	8.66082	3.56543	3.94728			3.83321	8.65477	5.85979	8.04775	3.55001	8.0375
	8.39469			6.72797	4.52522				4.68891	6.36715	3.39941	3.33974	6.33285	13.3115			7.29018	10.6449	11.0013	7.97646	7.68943	5.60796
	5.28766			11.4349	5.52556				8.35256	11.4078	2.69024	8.36087	17.9141	15.6101			11.5987	3.55201	9.307	8.60066	6.04968	6.27359
				11.6284	5.58524				8.36518	15.9524	5.69631	15.327	10.4808	15.1961			6.28589	10.5146	5.6914	7.50265	2.85647	8.89836
				6.33293	3.59961				5.71319	8.17509	6.71674	13.7113	7.43901	9.54233			3.68832	9.95701	14.6295	5.75595	6.95265	4.95873
				13.7263					11.4296	6.54316	11.255	23.1936	18.7411	5.489			5.16976	4.44167	5.44244	6.59598	5.37324	4.89614
				7.03142					4.74524	15.5274	10.7472	11.5871	7.95258	16.1921			9.0495	8.67142	8.44097	8.27447	5.45028	5.07138
				6.5534					4.01552	11.6798	6.11346	3.47273	11.5976	18.9432			9.87483	8.43055	4.9193	5.28127	3.6579	3.62468
				6.99711					7.41934	4.63288	17.8096	20.3206	4.06394	11.6553			18.3093	8.72234	8.07586	11.7198	7.73774	6.04006
				13.5314					6.83169	22.7771	24.9861	7.81344	19.8526	12.1858			5.05414	48.8814	5.5166	5.48366	7.52255	6.97163
				12.8738					10.2526	15.0615	12.8239	17.3451	4.82548	4.00166			13.1452	7.4822	11.0198	9.76043	12.1956	6.43333
				14.2741					5.92597	16.4568	11.8199	9.56693	8.37034	4.50213			5.11168	7.48943	9.14125	15.4816	11.0567	4.59726
									7.81219	5.63481	18.002	24.873	10.7535	10.7052			12.3749	4.8785	5.9725	7.19245	14.4551	6.59721
									10.1366	10.8183	5.75381	11.3745	8.68165	14.6425			7.36287	17.8795	5.41111	8.48453	11.8395	10.0708
									13.1711	18.432	4.23764	13.4418	14.0113	10.5401			29.3757	5.85895	19.998	8.35875	13.6556	10.5009
									35.9264	15.8362	17.8667	12.3835	9.70467	8.50149			9.63345	34.8872	9.76462	7.45005	3.25865	6.63615
									12.9102	6.78467	6.26283	7.35951	19.9567	17.2436			7.33456	15.0721	11.9219	13.03	6.80719	6.36898
									12.5833	4.99366	17.4836	7.31745	8.42969	9.5485			11.5278	13.8163	29.0863	5.8615	8.11027	5.34943
									13.6324	17.6927	4.77601	18.1395	6.96974	16.9254			9.2563	16.4011	19.5382	5.13238	8.433	16.0406
									7.39308	17.3064	17.9348	16.4536	15.2516	9.95152			46.8674	22.4248	17.0634	18.3095	15.5267	11.7533
									18.3932	8.32051	8.82805	24.5763	15.6556	4.28933			11.1093	13.1795	7.83929	12.3596	4.66086	8.66585
									9.82628	9.05523	7.58558	20.0753					14.2848	11.4892	15.7357	14.9413	14.5265	13.1837
									20.556	12.4315	12.51	20.9001					25.8335	7.4472	15.271	9.1234	11.6477	14.6274
									15.68	15.469	35.9787	8.55062					27.267	13.9048	25.2726	7.18606	16.477	5.6737
									12.0306	21.3086	27.9365	6.8036					21.0034	12.2285	44.1995	6.52442	7.91836	13.1127
									5.37613	14.3189	9.10898	16.0018					17.2462	20.7888	12.2284	4.56039	10.0697	6.63285
									7.9322	17.2357	5.77849	11.1336					22.5213	27.03	13.8102	8.95005	10.4382	9.87746
									11.4894			13.9627					23.7087	27.4827	8.84028	14.4134	6.59882	5.59021
									9.67183								14.0941	13.4788	17.6013	8.51522	14.6235	8.22414
									16.5666								21.4878	22.9065	5.99985	7.47628	10.0564	10.7422
									8.31936								10.559	6.89858	8.71551	7.32791	11.4224	6.66884
									13.7687								10.9951	18.2002	32.2926	10.5183	11.4259	6.42675
									9.3509								10.7862	19.9002	13.6184	6.07063	8.30587	10.6738
									23.1877								26.8233	9.25691	32.6521	18.1217	16.4675	6.37284
									8.10345								7.64289	11.1841	27.8248	16.511	9.80496	6.35502
									22.4683								14.8952	8.4167	14.2417	18.9426	17.9365	7.75371
																	25.4465	8.69183	13.6253	13.5624	8.70141	10.6143
																	11.4063	15.7282	8.24879	13.1799	9.6052	9.32292
																	9.86178	20.4208	8.83755	3.64755	6.29164	8.19764
																	4.69709	25.8261	14.776	20.0148	16.1364	9.1295
																	18.9559	5.15998	9.94524	11.8558	16.378	14.094
																	10.3852	26.9908	10.9619	4.84576	6.88392	6.12065
																	22.2518	17.3293	19.7164	20.5254	7.16661	10.7831
																	22.0582	12.6729	24.8616	12.378	15.6303	8.75584
																	14.6602	11.0146	8.73033	18.7635	8.1169	11.5525
																	17.631	10.8769	6.58662	15.0204	9.86089
																	20.2043	12.9454	15.3828	5.06675	16.1201
																	8.31544	13.0655	22.4564	8.55582	14.3715
																	15.601	12.0266	20.3481	6.09338	3.99061
																	14.7256	20.7347	5.97474	12.9967	5.20325
																	10.2584	8.60466	6.62756	11.6677	7.96336
																	25.5808	12.0574	42.2759	9.95388	21.3471
																	9.3878	5.60894	4.83327	8.0712	5.19005
																	10.37	3.22724	14.8729	23.2482	9.28908
																	24.1712	18.1285	20.368	8.89134	7.03087
																	14.3579	17.5922	33.6972
																	14.2449	10.8726	6.39733
																	21.5396	16.2392	22.9211
																	6.70992	19.9513	16.8715
																	7.94197	22.7321	5.1511
																	14.9074	22.9195	11.1053
																	6.78344	13.2191	14.3184
																	29.089	10.7147	12.6288
																	7.83627	11.2573	21.7116
																	9.40797	12.647	9.88581
																		13.4429

## Sheet: FIGURE 3a
	ROSS PLOT- NORMAL-TRACKING-COORDINATES										ROSS PLOT- SUB-CLINICAL-HIGH MOBILITY										ROSS PLOT- SUB-CLINICAL-LOW MOBILITY									ROSS PLOT- EARLY-CLINICAL-HIGH- MOBILITY											ROSS PLOT- EARLY-CLINICAL-LOW- MOBILITY
		Track n∞	Slice n∞	X	Y	Distance	Velocity	Pixel Value				Track n∞	Slice n∞	X	Y	Distance	Velocity	Pixel Value			Track n∞	Slice n°	X	Y	Distance	Velocity	Pixel Value				Track n∞	Slice n∞	X	Y	Distance	Velocity	Pixel Value				Track n∞	Slice n∞	X	Y	Distance	Velocity	Pixel Value
	1	1	1	66	74	-1	-1	-16711905			1	1	1	43	53	-1	-1	-16646391		1	1	1	66	52	-1	-1	-16711936			1	1	1	88	110	-1	-1	-16449780			1	1	1	44	44	-1	-1	-16711929
	2	1	2	67	73	0.812749	0.16255	-16711918			2	1	2	44	52	0.812749	0.16255	-16384232		2	1	2	62	55	2.8735	0.5747	-16325108			2	1	2	88	110	0	0	-16724219			2	1	2	42	44	1.149	0.23	-16188661
	3	1	3	67	73	0	0	-16711915			3	1	3	46	53	1.28507	0.257014	-16385264		3	1	3	66	56	2.36955	0.47391	-16711936			3	1	3	85	103	4.377	0.875	-16079854			3	1	3	42	44	0	0	-16384498
	4	1	4	67	73	0	0	-15926503			4	1	4	46	56	1.7241	0.34482	-16580858		4	1	4	66	56	0	0	-16515324			4	1	4	80	88	9.087	1.817	-16740093			4	1	4	42	44	0	0	-16516086
	5	1	5	67	73	0	0	-15208662			5	1	5	46	56	0	0	-16187630		5	1	5	66	56	0	0	-16711936			5	1	5	80	88	0	0	-14959837			5	1	5	42	44	0	0	-16714229
	6	1	6	67	73	0	0	-16532455			6	1	6	46	56	0	0	-16187615		6	1	6	63	63	4.37678	0.875357	-16711936			6	1	6	75	72	9.634	1.927	-16722676			6	1	6	42	44	0	0	-16711931
	7	1	7	69	80	4.18388	0.836776	-16711878			7	1	7	48	56	1.1494	0.22988	-16449786		7	1	7	63	67	2.2988	0.45976	-16712960			7	1	7	72	60	7.109	1.422	-14883806			7	1	7	42	44	0	0	-16711936
	8	1	8	69	80	0	0	-16712382			8	1	8	48	56	0	0	-16711928		8	1	8	63	67	0	0	-16713968			8	1	8	66	48	7.71	1.542	-16406260			8	1	8	42	44	0	0	-16713463
	9	1	9	69	80	0	0	-16449992			9	1	9	48	56	0	0	-16711918		9	1	9	63	67	0	0	-16253159			9	1	9	66	48	0	0	-16208623			9	1	9	42	44	0	0	-16712946
	10	1	10	69	80	0	0	-16318659			10	1	10	48	56	0	0	-16711915		10	1	10	65	69	1.6255	0.325099	-16319734			10	1	10	66	48	0	0	-16734208			10	1	10	42	44	0	0	-16712185
	11	1	11	69	80	0	0	-16713418			11	1	11	50	58	1.6255	0.325099	-16580848		11	1	11	66	69	0.5747	0.11494	-16515835			11	1	11	66	48	0	0	-16403180			11	1	11	42	44	0	0	-16516850
	12	1	12	69	80	0	0	-16711872			12	1	12	49	58	0.5747	0.11494	-16384227		12	1	12	66	69	0	0	-15991030			12	1	12	66	48	0	0	-16141286			12	1	12	42	44	0	0	-16516084
	13	1	13	69	80	0	0	-16711885			13	1	13	49	58	0	0	-16449772		13	1	13	66	69	0	0	-16253170			13	1	13	66	48	0	0	-16735487			13	1	13	42	44	0	0	-16712697
	14	1	14	70	84	2.36955	0.47391	-16647872			14	1	14	49	58	0	0	-16711924		14	1	14	66	71	1.1494	0.22988	-16712167			14	1	14	66	48	0	0	-16076268			14	1	14	42	44	0	0	-16712445
	15	1	15	70	84	0	0	-16711883			15	1	15	49	58	0	0	-16449769		15	1	15	66	71	0	0	-16713723			15	1	15	66	48	0	0	-14957778			15	1	15	42	44	0	0	-16711936
	16	1	16	70	84	0	0	-16711862			16	1	16	49	58	0	0	-16714455		16	1	16	66	71	0	0	-16712425			16	1	16	66	48	0	0	-16538091			16	1	16	42	44	0	0	-16712439
	17	1	17	70	84	0	0	-16712129			17	1	17	51	55	2.07211	0.414422	-16725248		17	1	17	66	71	0	0	-16717560			17	1	17	66	48	0	0	-16735466			17	1	17	42	44	0	0	-16385264
	18	1	18	70	84	0	0	-16712897			18	1	18	51	55	0	0	-15007957		18	1	18	66	71	0	0	-16725752			18	1	18	66	48	0	0	-16606964			18	1	18	42	44	0	0	-16711924
	19	1	19	70	84	0	0	-16713668			19	1	19	52	56	0.812749	0.16255	-15802591		19	1	19	67	74	1.81736	0.363472	-16711915			19	1	19	66	48	0	0	-16744704			19	1	19	42	44	0	0	-16711929
	20	1	20	74	84	2.2988	0.45976	-16711850			20	1	20	53	53	1.81736	0.363472	-16723952		20	1	20	67	74	0	0	-16451045			20	1	20	67	53	2.93	0.586	-16344819			20	1	20	42	44	0	0	-16646393
	21	1	21	74	84	0	0	-16647586			21	1	21	55	50	2.07211	0.414422	-16323812		21	1	21	67	74	0	0	-16711907			21	1	21	67	53	0	0	-16742901			21	1	21	42	44	0	0	-15859949
	22	1	22	74	84	0	0	-16515495			22	1	22	55	50	0	0	-16718308		22	1	22	67	74	0	0	-16253399			22	1	22	67	53	0	0	-16742135			22	1	22	42	44	0	0	-16187901
	23	1	23	74	84	0	0	-16647594			23	1	23	55	50	0	0	-16720107		23	1	23	67	74	0	0	-15664599			23	1	23	67	57	2.299	0.46	-15168730			23	1	23	42	44	0	0	-16580850
	24	1	24	74	84	0	0	-16319397			24	1	24	57	49	1.28507	0.257014	-16718317		24	1	24	67	74	0	0	-16715504			24	1	24	67	57	0	0	-15959014			24	1	24	42	44	0	0	-16711934
	25	1	25	74	84	0	0	-16385449			25	1	25	57	49	0	0	-15011021		25	1	25	67	74	0	0	-16122589			25	1	25	67	57	0	0	-14379986			25	1	25	42	44	0	0	-16711922
	26	1	26	74	84	0	0	-16712378			26	1	26	57	49	0	0	-16520923		26	1	26	67	74	0	0	-16384482			26	1	26	67	57	0	0	-15565285			26	1	26	42	44	0	0	-16711933
	27	1	27	74	84	0	0	-16712614			27	1	27	59	47	1.6255	0.325099	-16720624		27	1	27	67	71	1.7241	0.34482	-16713696			27	1	27	67	57	0	0	-16286186			27	1	27	42	44	0	0	-16580847
	28	1	28	74	84	0	0	-16712376			28	1	28	59	47	0	0	-16584161		28	1	28	67	71	0	0	-16711903			28	1	28	67	57	0	0	-16220140			28	1	28	42	44	0	0	-16646384
	29	1	29	74	84	0	0	-16712107			29	1	29	59	47	0	0	-16655855		29	1	29	67	71	0	0	-16580833			29	1	29	67	57	0	0	-16087532			29	1	29	42	44	0	0	-16711920
	30	1	30	74	84	0	0	-16515747			30	1	30	61	45	1.6255	0.325099	-16325362		30	1	30	67	71	0	0	-16711906			30	1	30	67	57	0	0	-16616179			30	1	30	42	44	0	0	-16321007
	31	1	31	74	84	0	0	-16450467			31	1	31	60	46	0.812749	0.16255	-16722405		31	1	31	67	71	0	0	-16711915			31	1	31	67	60	1.724	0.345	-16021737			31	1	31	42	44	0	0	-16318696
	32	1	32	74	84	0	0	-16319146			32	1	32	60	46	0	0	-15754430		32	1	32	67	71	0	0	-16711914			32	1	32	67	60	0	0	-15891943			32	1	32	42	44	0	0	-16711910
	33	1	33	74	84	0	0	-15925427			33	1	33	60	50	2.2988	0.45976	-15993297		33	1	33	67	71	0	0	-16384234			33	1	33	67	60	0	0	-14905561			33	1	33	42	44	0	0	-16319718
	34	1	34	74	84	0	0	-16318645			34	1	34	60	50	0	0	-16647384		34	1	34	67	71	0	0	-16515305			34	1	34	67	60	0	0	-16419567			34	1	34	42	44	0	0	-16711913
	35	1	35	74	84	0	0	-16188607			35	1	35	60	50	0	0	-16717274		35	1	35	67	71	0	0	-16123630			35	1	35	62	68	5.422	1.084	-16752384			35	1	35	42	44	0	0	-16713974
	36	1	36	74	84	0	0	-15993013			36	1	36	61	49	0.812749	0.16255	-15545050		36	1	36	67	71	0	0	-16319208			36	1	36	52	76	7.36	1.472	-16553706			36	1	36	42	44	0	0	-16449772
	37	2	1	84	61	-1	-1	-15861479			37	2	1	34	43	-1	-1	-16581376		37	2	1	37	46	-1	-1	-16188910			37	2	1	133	29	-1	-1	-16711932			37	2	1	39	70	-1	-1	-16712952
	38	2	2	83	58	1.81736	0.363472	-16711909			38	2	2	36	42	1.28507	0.257014	-16582138		38	2	2	37	51	2.8735	0.5747	-16711921			38	2	2	132	29	0.575	0.115	-14353612			38	2	2	39	70	0	0	-16187626
	39	2	3	83	58	0	0	-16712431			39	2	3	35	43	0.812749	0.16255	-16581627		39	2	3	37	51	0	0	-16711912			39	2	3	129	31	2.072	0.414	-16712192			39	2	3	39	70	0	0	-16457211
	40	2	4	86	65	4.37678	0.875357	-16124396			40	2	4	35	44	0.5747	0.11494	-16580862		40	2	4	35	55	2.57014	0.514027	-16714991			40	2	4	129	31	0	0	-16715254			40	2	4	39	70	0	0	-16724480
	41	2	5	86	65	0	0	-15534563			41	2	5	35	44	0	0	-16711936		41	2	5	35	55	0	0	-16516840			41	2	5	125	31	2.299	0.46	-16188912			41	2	5	39	70	0	0	-16723456
	42	2	6	86	65	0	0	-16059092			42	2	6	35	44	0	0	-16711935		42	2	6	33	58	2.07211	0.414422	-16646614			42	2	6	125	31	0	0	-15862506			42	2	6	39	70	0	0	-16588007
	43	2	7	86	65	0	0	-16387303			43	2	7	35	46	1.1494	0.22988	-16452084		43	2	7	33	58	0	0	-16515288			43	2	7	125	31	0	0	-15993325			43	2	7	39	70	0	0	-16725504
	44	2	8	86	65	0	0	-16386016			44	2	8	35	46	0	0	-16255986		44	2	8	33	58	0	0	-16713703			44	2	8	125	31	0	0	-15466728			44	2	8	39	70	0	0	-16062441
	45	2	9	90	68	2.8735	0.5747	-16711904			45	2	9	35	46	0	0	-16450794		45	2	9	29	59	2.36955	0.47391	-16384195			45	2	9	125	31	0	0	-15208924			45	2	9	39	70	0	0	-16723697
	46	2	10	90	68	0	0	-16515315			46	2	10	36	45	0.812749	0.16255	-16711935		46	2	10	29	59	0	0	-16122583			46	2	10	125	31	0	0	-15605989			46	2	10	39	70	0	0	-16391142
	47	2	11	90	68	0	0	-16646381			47	2	11	35	45	0.5747	0.11494	-16711928		47	2	11	29	59	0	0	-16319685			47	2	11	125	31	0	0	-16334827			47	2	11	41	71	1.285	0.257	-16135154
	48	2	12	90	68	0	0	-16711916			48	2	12	35	44	0.5747	0.11494	-16646390		48	2	12	27	59	1.1494	0.22988	-16450255			48	2	12	125	31	0	0	-15287270			48	2	12	41	71	0	0	-16724210
	49	2	13	90	68	0	0	-16056548			49	2	13	33	45	1.28507	0.257014	-16712689		49	2	13	27	59	0	0	-16712399			49	2	13	125	31	0	0	-16738048			49	2	13	41	71	0	0	-16730103
	50	2	14	90	68	0	0	-16711930			50	2	14	33	45	0	0	-16711915		50	2	14	27	59	0	0	-16515801			50	2	14	125	31	0	0	-15419620			50	2	14	41	71	0	0	-16722679
	51	2	15	90	68	0	0	-16711905			51	2	15	33	45	0	0	-16449762		51	2	15	27	59	0	0	-16712403			51	2	15	125	31	0	0	-16736507			51	2	15	41	71	0	0	-16722161
	52	2	16	95	74	4.48855	0.89771	-16711925			52	2	16	33	45	0	0	-16711914		52	2	16	27	59	0	0	-15926484			52	2	16	123	30	1.285	0.257	-15275987			52	2	16	41	71	0	0	-16731648
	53	2	17	95	74	0	0	-16385501			53	2	17	33	45	0	0	-16711903		53	2	17	27	59	0	0	-16189126			53	2	17	123	30	0	0	-15475668			53	2	17	41	71	0	0	-16734976
	54	2	18	95	74	0	0	-16712690			54	2	18	33	45	0	0	-16711904		54	2	18	27	59	0	0	-16384977			54	2	18	123	30	0	0	-15217114			54	2	18	41	71	0	0	-16724965
	55	2	19	95	74	0	0	-16711920			55	2	19	33	45	0	0	-16711898		55	2	19	27	59	0	0	-16123083			55	2	19	123	30	0	0	-15940069			55	2	19	43	74	2.072	0.414	-16727781
	56	2	20	95	74	0	0	-16711913			56	2	20	33	45	0	0	-16711905		56	2	20	27	59	0	0	-15860941			56	2	20	123	30	0	0	-15152345			56	2	20	43	74	0	0	-16736255
	57	2	21	95	74	0	0	-16712191			57	2	21	33	45	0	0	-16711901		57	2	21	27	59	0	0	-16188876			57	2	21	123	30	0	0	-15088852			57	2	21	43	74	0	0	-16728816
	58	2	22	95	74	0	0	-16386279			58	2	22	33	45	0	0	-16712171		58	2	22	27	59	0	0	-16711872			58	2	22	119	30	2.299	0.46	-16737019			58	2	22	43	74	0	0	-16733696
	59	2	23	95	74	0	0	-16711928			59	2	23	33	45	0	0	-16476665		59	2	23	27	59	0	0	-16711862			59	2	23	119	30	0	0	-16341237			59	2	23	43	74	0	0	-16727786
	60	2	24	95	74	0	0	-16711899			60	2	24	39	47	3.63472	0.726944	-16728292		60	2	24	27	59	0	0	-16450993			60	2	24	119	30	0	0	-16743424			60	2	24	43	74	0	0	-16722401
	61	2	25	95	74	0	0	-16187610			61	2	25	49	50	6.00004	1.20001	-16745984		61	2	25	27	59	0	0	-16711889			61	2	25	119	30	0	0	-15885800			61	2	25	43	74	0	0	-16585936
	62	2	26	95	74	0	0	-16123612			62	2	26	50	51	0.812749	0.16255	-16748527		62	2	26	27	59	0	0	-16515273			62	2	26	119	30	0	0	-16151026			62	2	26	43	74	0	0	-16723928
	63	2	27	95	74	0	0	-16580826			63	2	27	50	51	0	0	-16743935		63	2	27	27	59	0	0	-16711883			63	2	27	119	30	0	0	-16416495			63	2	27	43	74	0	0	-16391629
	64	2	28	95	74	0	0	-16711923			64	2	28	56	56	4.48855	0.89771	-16062416		64	2	28	27	59	0	0	-16712657			64	2	28	111	30	4.598	0.92	-16732378			64	2	28	43	74	0	0	-16726247
	65	2	29	95	74	0	0	-15991284			65	2	29	56	56	0	0	-16716523		65	2	29	27	59	0	0	-16711886			65	2	29	111	30	0	0	-16009425			65	2	29	43	74	0	0	-16728814
	66	2	30	95	74	0	0	-16711914			66	2	30	59	56	1.7241	0.34482	-16257492		66	2	30	27	59	0	0	-16711879			66	2	30	111	30	0	0	-15091395			66	2	30	43	74	0	0	-16590036
	67	2	31	95	74	0	0	-16711905			67	2	31	59	56	0	0	-15864021		67	2	31	27	59	0	0	-16711904			67	2	31	111	30	0	0	-16408284			67	2	31	43	74	0	0	-16529876
	68	2	32	95	74	0	0	-16711896			68	2	32	59	56	0	0	-16131807		68	2	32	27	59	0	0	-16711909			68	2	32	111	30	0	0	-16077524			68	2	32	43	74	0	0	-16010965
	69	2	33	95	74	0	0	-16711911			69	2	33	61	57	1.28507	0.257014	-16723165		69	2	33	31	58	2.36955	0.47391	-16711871			69	2	33	111	30	0	0	-16743913			69	2	33	43	74	0	0	-16195280
	70	2	34	95	74	0	0	-16712151			70	2	34	61	57	0	0	-16725492		70	2	34	31	58	0	0	-16711874			70	2	34	111	30	0	0	-16280790			70	2	34	43	74	0	0	-16719829
	71	2	35	95	74	0	0	-16712931			71	2	35	61	57	0	0	-16728045		71	2	35	31	58	0	0	-16711882			71	2	35	111	30	0	0	-15618252			71	2	35	43	74	0	0	-15535297
	72	2	36	95	74	0	0	-16711897			72	2	36	61	57	0	0	-14951371		72	2	36	31	58	0	0	-16711869			72	2	36	111	30	0	0	-15358666			72	2	36	43	74	0	0	-16725218
	73	3	1	83	58	-1	-1	-16713698			73	3	1	52	69	-1	-1	-16711930		73	3	1	43	28	-1	-1	-16711930			73	3	1	55	98	-1	-1	-16200436			73	3	1	41	56	-1	-1	-16713216
	74	3	2	82	60	1.28507	0.257014	-16714208			74	3	2	48	66	2.8735	0.319278	-16711936		74	3	2	45	30	1.6255	0.325099	-16712442			74	3	2	55	98	0	0	-16721148			74	3	2	40	57	0.813	0.163	-16646393
	75	3	3	82	60	0	0	-16253157			75	3	3	47	62	2.36955	0.263283	-16580862		75	3	3	45	30	0	0	-16712191			75	3	3	52	97	1.817	0.363	-16722432			75	3	3	40	57	0	0	-16711918
	76	3	4	82	60	0	0	-15473097			76	3	4	47	58	2.2988	0.255422	-16711931		76	3	4	45	30	0	0	-16711930			76	3	4	50	96	1.285	0.257	-16720896			76	3	4	40	57	0	0	-16712946
	77	3	5	82	60	0	0	-16487914			77	3	5	47	60	1.1494	0.127711	-16711927		77	3	5	45	30	0	0	-16450816			77	3	5	50	96	0	0	-16711933			77	3	5	40	57	0	0	-16712181
	78	3	6	80	69	5.29847	1.05969	-16712676			78	3	6	48	59	0.812749	0.0903054	-16711932		78	3	6	46	37	4.06374	0.812749	-16319720			78	3	6	50	96	0	0	-16720384			78	3	6	40	57	0	0	-16646384
	79	3	7	80	69	0	0	-16713441			79	3	7	48	59	0	0	-16712431		79	3	7	46	37	0	0	-16450804			79	3	7	50	96	0	0	-16193263			79	3	7	40	57	0	0	-16711925
	80	3	8	80	69	0	0	-16712927			80	3	8	48	61	1.1494	0.127711	-16711915		80	3	8	46	37	0	0	-16646640			80	3	8	50	96	0	0	-16719616			80	3	8	40	57	0	0	-16711933
	81	3	9	79	69	0.5747	0.11494	-16711899			81	3	9	48	61	0	0	-16711913		81	3	9	47	37	0.5747	0.11494	-16583670			81	3	9	50	96	0	0	-16716288			81	3	9	40	57	0	0	-16580849
	82	3	10	78	69	0.5747	0.11494	-16580826			82	3	10	50	61	1.1494	0.127711	-15728854		82	3	10	47	37	0	0	-16711921			82	3	10	50	96	0	0	-16713725			82	3	10	40	57	0	0	-16712685
	83	3	11	80	73	2.57014	0.514027	-16711900			83	3	11	49	61	0.5747	0.0638556	-16711913		83	3	11	47	37	0	0	-16318691			83	3	11	50	96	0	0	-16712445			83	3	11	40	57	0	0	-16711922
	84	3	12	80	73	0	0	-16711901			84	3	12	49	61	0	0	-16711894		84	3	12	47	37	0	0	-16451045			84	3	12	50	96	0	0	-16712699			84	3	12	40	57	0	0	-16384233
	85	3	13	80	73	0	0	-16711900			85	3	13	49	60	0.5747	0.0638556	-16580828		85	3	13	47	37	0	0	-16646365			85	3	13	50	96	0	0	-16713468			85	3	13	40	57	0	0	-16582380
	86	3	14	80	73	0	0	-16712406			86	3	14	49	60	0	0	-16713187		86	3	14	47	37	0	0	-16711917			86	3	14	50	96	0	0	-15925482			86	3	14	40	57	0	0	-16515568
	87	3	15	80	73	0	0	-16647117			87	3	15	49	60	0	0	-16711899		87	3	15	47	37	0	0	-16711904			87	3	15	50	96	0	0	-15404260			87	3	15	40	57	0	0	-15859942
	88	3	16	80	73	0	0	-16713162			88	3	16	49	60	0	0	-16646354		88	3	16	47	37	0	0	-16515807			88	3	16	50	96	0	0	-16723712			88	3	16	40	57	0	0	-16715506
	89	3	17	76	78	3.67988	0.735975	-16711881			89	3	17	49	60	0	0	-16711902		89	3	17	47	37	0	0	-16057815			89	3	17	50	96	0	0	-16060909			89	3	17	40	57	0	0	-16385513
	90	3	18	78	75	2.07211	0.414422	-16711885			90	3	18	49	60	0	0	-16712926		90	3	18	47	37	0	0	-16712675			90	3	18	46	95	2.37	0.474	-16583417			90	3	18	40	57	0	0	-15533793
	91	3	19	78	75	0	0	-16646338			91	3	19	51	59	1.28507	0.142785	-16515283		91	3	19	47	37	0	0	-16711891			91	3	19	46	95	0	0	-15405026			91	3	19	40	57	0	0	-16647151
	92	3	20	78	75	0	0	-16711889			92	3	20	51	59	0	0	-16712925		92	3	20	47	37	0	0	-16449747			92	3	20	46	95	0	0	-16733685			92	3	20	40	57	0	0	-16518126
	93	3	21	78	75	0	0	-16711883			93	3	21	51	59	0	0	-16711893		93	3	21	47	37	0	0	-16711905			93	3	21	46	95	0	0	-15885033			93	3	21	40	57	0	0	-16648181
	94	3	22	78	80	2.8735	0.5747	-16711880			94	3	22	52	59	0.5747	0.0638556	-16712146		94	3	22	47	37	0	0	-16711892			94	3	22	49	102	4.377	0.875	-16732146			94	3	22	40	57	0	0	-16713204
	95	3	23	78	80	0	0	-16711896			95	3	23	52	59	0	0	-16712660		95	3	23	47	37	0	0	-16711908			95	3	23	49	102	0	0	-15742958			95	3	23	40	57	0	0	-16712695
	96	3	24	78	80	0	0	-16711878			96	3	24	52	59	0	0	-16712666		96	3	24	47	37	0	0	-16711902			96	3	24	49	102	0	0	-16572155			96	3	24	40	57	0	0	-16712690
	97	3	25	78	80	0	0	-16711872			97	3	25	52	59	0	0	-16712922		97	3	25	47	37	0	0	-16711911			97	3	25	45	83	11.159	2.232	-16752384			97	3	25	40	57	0	0	-16254954
	98	3	26	78	80	0	0	-16711868			98	3	26	53	59	0.5747	0.0638556	-16711894		98	3	26	47	37	0	0	-16712680			98	3	26	44	67	9.213	1.843	-16730075			98	3	26	40	57	0	0	-16253941
	99	3	27	78	80	0	0	-16711868			99	3	27	53	59	0	0	-16712162		99	3	27	48	31	3.49576	0.699153	-16318686			99	3	27	48	54	7.817	1.563	-14944987			99	3	27	40	57	0	0	-16451571
	100	3	28	78	80	0	0	-16711858			100	3	28	53	59	0	0	-16713187		100	3	28	48	31	0	0	-16712171			100	3	28	48	48	3.448	0.69	-16732641			100	3	28	40	57	0	0	-16320496
	101	3	29	78	80	0	0	-16580783			101	3	29	53	59	0	0	-16711902		101	3	29	48	31	0	0	-16711922			101	3	29	48	48	0	0	-15286212			101	3	29	40	57	0	0	-16452846
	102	3	30	78	80	0	0	-16515261			102	3	30	53	59	0	0	-16712410		102	3	30	48	31	0	0	-16253148			102	3	30	48	48	0	0	-16739299			102	3	30	40	57	0	0	-16711912
	103	3	31	78	80	0	0	-16711878			103	3	31	53	59	0	0	-16713437		103	3	31	48	31	0	0	-16449752			103	3	31	48	48	0	0	-16738515			103	3	31	40	57	0	0	-16646376
	104	3	32	78	80	0	0	-16711859			104	3	32	53	59	0	0	-16711894		104	3	32	48	31	0	0	-16711907			104	3	32	50	50	1.625	0.325	-16720867			104	3	32	40	57	0	0	-16451306
	105	3	33	78	80	0	0	-16056751			105	3	33	53	58	0.5747	0.0638556	-16711892		105	3	33	48	31	0	0	-16711911			105	3	33	50	50	0	0	-15737550			105	3	33	40	57	0	0	-16516338
	106	3	34	78	80	0	0	-16384169			106	3	34	53	58	0	0	-16711896		106	3	34	48	31	0	0	-16712692			106	3	34	50	50	0	0	-16007634			106	3	34	40	57	0	0	-16583407
	107	3	35	78	80	0	0	-16122782			107	3	35	53	58	0	0	-16711887		107	3	35	48	31	0	0	-16712434			107	3	35	50	50	0	0	-16734427			107	3	35	40	57	0	0	-16123872
	108	3	36	78	80	0	0	-16260036			108	3	36	53	58	0	0	-16711891		108	3	36	48	31	0	0	-16646376			108	3	36	50	50	0	0	-14497967			108	3	36	40	57	0	0	-16385514
	109	4	1	79	65	-1	-1	-16711927			109	4	1	84	86	-1	-1	-16711919		109	4	1	53	62	-1	-1	-16711936			109	4	1	60	123	-1	-1	-16602612			109	4	1	30	32	-1	-1	-16711936
	110	4	2	76	67	2.07211	0.414422	-16711919			110	4	2	83	84	1.28507	0.257014	-16515294		110	4	2	53	64	1.1494	0.22988	-16711936			110	4	2	60	123	0	0	-15406827			110	4	2	30	32	0	0	-16190971
	111	4	3	77	71	2.36955	0.47391	-16647395			111	4	3	83	85	0.5747	0.11494	-16711850		111	4	3	50	63	1.81736	0.363472	-16711936			111	4	3	54	120	3.855	0.771	-16711936			111	4	3	30	32	0	0	-16456948
	112	4	4	77	71	0	0	-16385000			112	4	4	83	85	0	0	-16711845		112	4	4	50	63	0	0	-16712448			112	4	4	54	120	0	0	-16515318			112	4	4	30	32	0	0	-16742400
	113	4	5	77	71	0	0	-16711921			113	4	5	82	84	0.812749	0.16255	-16711831		113	4	5	50	63	0	0	-16711935			113	4	5	54	120	0	0	-16056575			113	4	5	30	32	0	0	-16744192
	114	4	6	77	71	0	0	-16319710			114	4	6	82	84	0	0	-16711850		114	4	6	51	66	1.81736	0.363472	-16711933			114	4	6	54	120	0	0	-16332531			114	4	6	25	40	5.422	1.084	-16732672
	115	4	7	77	71	0	0	-15926754			115	4	7	82	84	0	0	-16711842		115	4	7	51	66	0	0	-16384244			115	4	7	54	120	0	0	-16743168			115	4	7	25	40	0	0	-16266742
	116	4	8	77	71	0	0	-14621404			116	4	8	82	84	0	0	-16711859		116	4	8	51	65	0.5747	0.11494	-16713439			116	4	8	54	120	0	0	-16749312			116	4	8	25	40	0	0	-16392426
	117	4	9	73	79	5.14027	1.02805	-15861711			117	4	9	82	84	0	0	-16712356		117	4	9	51	65	0	0	-16712939			117	4	9	59	130	6.425	1.285	-16720109			117	4	9	25	40	0	0	-16399340
	118	4	10	73	79	0	0	-16711912			118	4	10	82	84	0	0	-16517789		118	4	10	51	65	0	0	-16712676			118	4	10	59	130	0	0	-14944988			118	4	10	25	40	0	0	-16734706
	119	4	11	73	79	0	0	-16712169			119	4	11	82	84	0	0	-16580779		119	4	11	51	65	0	0	-16711904			119	4	11	59	130	0	0	-16189164			119	4	11	25	40	0	0	-16348656
	120	4	12	73	79	0	0	-16714466			120	4	12	82	84	0	0	-16714666		120	4	12	51	65	0	0	-16711889			120	4	12	59	130	0	0	-16319986			120	4	12	35	38	5.861	1.172	-15744231
	121	4	13	73	79	0	0	-16744698			121	4	13	82	84	0	0	-16713624		121	4	13	51	65	0	0	-16712658			121	4	13	59	130	0	0	-16713717			121	4	13	35	38	0	0	-16729846
	122	4	14	71	92	7.559	1.5118	-16711904			122	4	14	82	84	0	0	-16723108		122	4	14	51	65	0	0	-16515531			122	4	14	59	130	0	0	-15599594			122	4	14	35	38	0	0	-16732404
	123	4	15	71	92	0	0	-16711891			123	4	15	82	84	0	0	-16723886		123	4	15	51	65	0	0	-16711887			123	4	15	68	128	5.298	1.06	-16735995			123	4	15	35	38	0	0	-16729583
	124	4	16	71	92	0	0	-16711893			124	4	16	75	82	4.18388	0.836776	-16131493		124	4	16	51	65	0	0	-16646589			124	4	16	68	128	0	0	-16738048			124	4	16	35	38	0	0	-16734208
	125	4	17	71	92	0	0	-16516822			125	4	17	75	82	0	0	-15408540		125	4	17	53	65	1.1494	0.22988	-16711871			125	4	17	68	128	0	0	-16071402			125	4	17	35	38	0	0	-16734972
	126	4	18	71	92	0	0	-15929552			126	4	18	75	82	0	0	-15340940		126	4	18	53	65	0	0	-16711865			126	4	18	68	128	0	0	-16726004			126	4	18	35	38	0	0	-16733176
	127	4	19	68	98	3.8552	0.771041	-16711842			127	4	19	75	82	0	0	-15210130		127	4	19	53	65	0	0	-16711861			127	4	19	68	128	0	0	-16721144			127	4	19	35	38	0	0	-16405230
	128	4	20	68	98	0	0	-16711860			128	4	20	75	82	0	0	-14682248		128	4	20	53	65	0	0	-16711865			128	4	20	68	128	0	0	-16582892			128	4	20	41	43	4.489	0.898	-16739070
	129	4	21	68	98	0	0	-16711861			129	4	21	75	82	0	0	-14552964		129	4	21	53	65	0	0	-16711853			129	4	21	68	128	0	0	-16270315			129	4	21	41	43	0	0	-16340215
	130	4	22	68	98	0	0	-16713154			130	4	22	75	82	0	0	-16533164		130	4	22	53	65	0	0	-16711864			130	4	22	78	126	5.861	1.172	-16529402			130	4	22	41	43	0	0	-16738560
	131	4	23	68	98	0	0	-16712121			131	4	23	75	82	0	0	-15604361		131	4	23	53	65	0	0	-16711872			131	4	23	78	126	0	0	-16729323			131	4	23	41	43	0	0	-16734460
	132	4	24	68	98	0	0	-16712117			132	4	24	75	80	1.1494	0.22988	-16057707		132	4	24	53	65	0	0	-16712114			132	4	24	78	126	0	0	-16740343			132	4	24	41	43	0	0	-16009183
	133	4	25	68	98	0	0	-16384438			133	4	25	75	80	0	0	-14682230		133	4	25	53	65	0	0	-16580785			133	4	25	78	126	0	0	-16499699			133	4	25	41	43	0	0	-15739868
	134	4	26	68	98	0	0	-15925930			134	4	26	75	80	0	0	-16715633		134	4	26	53	65	0	0	-16711859			134	4	26	92	118	9.267	1.853	-15472514			134	4	26	41	43	0	0	-15745762
	135	4	27	68	98	0	0	-15471523			135	4	27	75	80	0	0	-15604603		135	4	27	53	65	0	0	-16580775			135	4	27	92	118	0	0	-15667583			135	4	27	41	43	0	0	-14888401
	136	4	28	68	98	0	0	-15079584			136	4	28	75	80	0	0	-16193919		136	4	28	53	65	0	0	-16711852			136	4	28	92	118	0	0	-16260221			136	4	28	41	43	0	0	-16529386
	137	4	29	65	102	2.8735	0.5747	-16711858			137	4	29	75	80	0	0	-16001655		137	4	29	53	65	0	0	-16711848			137	4	29	94	114	2.57	0.514	-15930480			137	4	29	41	43	0	0	-15806430
	138	4	30	65	102	0	0	-16711841			138	4	30	75	84	2.2988	0.45976	-16733127		138	4	30	53	68	1.7241	0.34482	-16711865			138	4	30	94	114	0	0	-16389744			138	4	30	41	43	0	0	-16728808
	139	4	31	65	102	0	0	-16711841			139	4	31	75	84	0	0	-16003757		139	4	31	53	68	0	0	-16711857			139	4	31	94	114	0	0	-16717427			139	4	31	41	43	0	0	-15475415
	140	4	32	65	102	0	0	-16711843			140	4	32	75	84	0	0	-15679143		140	4	32	53	68	0	0	-16711859			140	4	32	94	114	0	0	-15945838			140	4	32	41	43	0	0	-15868887
	141	4	33	65	102	0	0	-16711845			141	4	33	75	84	0	0	-16734135		141	4	33	53	68	0	0	-16711861			141	4	33	98	104	6.19	1.238	-15941607			141	4	33	41	43	0	0	-16590564
	142	4	34	65	102	0	0	-16711829			142	4	34	75	84	0	0	-16739013		142	4	34	53	68	0	0	-16711864			142	4	34	98	104	0	0	-16722161			142	4	34	41	43	0	0	-15475409
	143	4	35	65	102	0	0	-16711807			143	4	35	75	84	0	0	-16740047		143	4	35	53	68	0	0	-16711861			143	4	35	98	104	0	0	-16591344			143	4	35	41	43	0	0	-16722137
	144	4	36	65	102	0	0	-16712077			144	4	36	74	79	2.93041	0.586081	-16256867		144	4	36	53	68	0	0	-16711859			144	4	36	98	104	0	0	-16741626			144	4	36	41	43	0	0	-16724440
	145	5	1	59	75	-1	-1	-16711845			145	5	1	39	49	-1	-1	-16582141		145	5	1	67	43	-1	-1	-15469037			145	5	1	56	56	-1	-1	-16581101			145	5	1	33	33	-1	-1	-16712960
	146	5	2	59	75	0	0	-16711830			146	5	2	38	54	2.93041	0.586081	-16254202		146	5	2	63	39	3.25099	0.650199	-16711921			146	5	2	55	56	0.575	0.115	-16123120			146	5	2	31	34	1.285	0.257	-16711932
	147	5	3	59	75	0	0	-16711795			147	5	3	38	54	0	0	-16515327		147	5	3	65	42	2.07211	0.414422	-15337952			147	5	3	52	56	1.724	0.345	-16712431			147	5	3	31	34	0	0	-16711936
	148	5	4	59	75	0	0	-16711771			148	5	4	37	54	0.5747	0.11494	-16057837		148	5	4	68	41	1.81736	0.363472	-16515314			148	5	4	52	56	0	0	-16320245			148	5	4	31	34	0	0	-16711935
	149	5	5	59	75	0	0	-16711777			149	5	5	37	54	0	0	-16711936		149	5	5	68	40	0.5747	0.11494	-16711919			149	5	5	52	56	0	0	-16058617			149	5	5	31	34	0	0	-16711936
	150	5	6	59	75	0	0	-16712837			150	5	6	37	55	0.5747	0.11494	-16711933		150	5	6	68	40	0	0	-16711910			150	5	6	52	56	0	0	-16582130			150	5	6	31	34	0	0	-16711926
	151	5	7	59	81	3.4482	0.68964	-16711710			151	5	7	36	55	0.5747	0.11494	-16711928		151	5	7	68	40	0	0	-16711900			151	5	7	52	56	0	0	-15862272			151	5	7	31	34	0	0	-16711928
	152	5	8	59	81	0	0	-16711955			152	5	8	36	55	0	0	-16711932		152	5	8	68	40	0	0	-16515270			152	5	8	53	61	2.93	0.586	-15993828			152	5	8	31	34	0	0	-16711924
	153	5	9	59	81	0	0	-16384014			153	5	9	36	55	0	0	-16711923		153	5	9	68	40	0	0	-16450516			153	5	9	55	60	1.285	0.257	-15467230			153	5	9	31	34	0	0	-16711935
	154	5	10	59	81	0	0	-16515098			154	5	10	36	55	0	0	-16711916		154	5	10	68	42	1.1494	0.22988	-16516050			154	5	10	55	60	0	0	-15274457			154	5	10	31	34	0	0	-16711926
	155	5	11	59	81	0	0	-16711740			155	5	11	35	57	1.28507	0.257014	-16253414		155	5	11	68	42	0	0	-16384472			155	5	11	55	60	0	0	-15734254			155	5	11	31	34	0	0	-16711919
	156	5	12	59	81	0	0	-16384090			156	5	12	35	57	0	0	-16712432		156	5	12	68	42	0	0	-15927755			156	5	12	55	60	0	0	-15141337			156	5	12	31	34	0	0	-16711920
	157	5	13	63	86	3.67988	0.735975	-16647937			157	5	13	35	57	0	0	-16712171		157	5	13	68	42	0	0	-16711881			157	5	13	55	60	0	0	-14879957			157	5	13	31	34	0	0	-16713206
	158	5	14	63	86	0	0	-16384257			158	5	14	35	57	0	0	-16515557		158	5	14	68	42	0	0	-16711887			158	5	14	55	60	0	0	-15078363			158	5	14	31	34	0	0	-16646379
	159	5	15	63	86	0	0	-16580609			159	5	15	35	57	0	0	-16648157		159	5	15	68	46	2.2988	0.45976	-16711892			159	5	15	55	60	0	0	-15076817			159	5	15	31	34	0	0	-16713455
	160	5	16	63	86	0	0	-16252945			160	5	16	35	57	0	0	-16712425		160	5	16	68	46	0	0	-16711881			160	5	16	55	60	0	0	-15145428			160	5	16	31	36	1.149	0.23	-16712182
	161	5	17	63	86	0	0	-16581121			161	5	17	35	54	1.7241	0.34482	-16580813		161	5	17	70	44	1.6255	0.325099	-16711886			161	5	17	53	62	1.625	0.325	-16711930			161	5	17	31	36	0	0	-16711914
	162	5	18	63	86	0	0	-16385285			162	5	18	35	54	0	0	-16712150		162	5	18	70	44	0	0	-16711896			162	5	18	55	62	1.149	0.23	-16515835			162	5	18	31	36	0	0	-16711929
	163	5	19	63	86	0	0	-16581381			163	5	19	35	54	0	0	-16712146		163	5	19	70	44	0	0	-16712132			163	5	19	55	62	0	0	-16711932			163	5	19	31	36	0	0	-16713178
	164	5	20	63	86	0	0	-15859969			164	5	20	35	54	0	0	-16318670		164	5	20	70	44	0	0	-16711887			164	5	20	55	62	0	0	-16646381			164	5	20	31	36	0	0	-16188132
	165	5	21	63	86	0	0	-16122625			165	5	21	35	56	1.1494	0.22988	-16711888		165	5	21	70	44	0	0	-16711893			165	5	21	55	62	0	0	-16711926			165	5	21	31	36	0	0	-16648673
	166	5	22	63	86	0	0	-16056321			166	5	22	34	56	0.5747	0.11494	-16711877		166	5	22	70	44	0	0	-16711890			166	5	22	55	62	0	0	-16711930			166	5	22	31	36	0	0	-16190167
	167	5	23	63	86	0	0	-16451078			167	5	23	34	56	0	0	-16515274		167	5	23	70	44	0	0	-16711898			167	5	23	55	62	0	0	-16580852			167	5	23	31	36	0	0	-15468235
	168	5	24	63	86	0	0	-16384513			168	5	24	34	56	0	0	-16711894		168	5	24	70	44	0	0	-16711926			168	5	24	55	62	0	0	-15669472			168	5	24	31	36	0	0	-16126941
	169	5	25	67	86	2.2988	0.45976	-16712193			169	5	25	34	56	0	0	-16449739		169	5	25	70	47	1.7241	0.34482	-16385488			169	5	25	61	66	4.144	0.829	-16533747			169	5	25	31	36	0	0	-14358731
	170	5	26	67	86	0	0	-16580609			170	5	26	34	56	0	0	-16711875		170	5	26	70	47	0	0	-16712132			170	5	26	62	68	1.285	0.257	-16727551			170	5	26	31	36	0	0	-14685390
	171	5	27	67	86	0	0	-16580609			171	5	27	34	56	0	0	-15795648		171	5	27	70	47	0	0	-16712140			171	5	27	73	67	6.348	1.27	-16146152			171	5	27	31	36	0	0	-14944710
	172	5	28	67	86	0	0	-16712196			172	5	28	34	56	0	0	-16711875		172	5	28	70	47	0	0	-16712638			172	5	28	76	65	2.072	0.414	-16015077			172	5	28	34	38	2.072	0.414	-16711912
	173	5	29	67	86	0	0	-16711942			173	5	29	34	56	0	0	-16712903		173	5	29	70	47	0	0	-16122563			173	5	29	86	59	6.702	1.34	-16736220			173	5	29	34	38	0	0	-16711915
	174	5	30	67	86	0	0	-16386561			174	5	30	34	56	0	0	-16711865		174	5	30	69	48	0.812749	0.16255	-16318930			174	5	30	93	56	4.377	0.875	-15889373			174	5	30	34	38	0	0	-16711906
	175	5	31	67	86	0	0	-16057089			175	5	31	34	55	0.5747	0.11494	-15926443		175	5	31	69	48	0	0	-15730627			175	5	31	99	52	4.144	0.829	-16743405			175	5	31	34	38	0	0	-16711902
	176	5	32	67	86	0	0	-16582409			176	5	32	34	55	0	0	-16711877		176	5	32	69	48	0	0	-16712148			176	5	32	106	53	4.064	0.813	-16678624			176	5	32	34	38	0	0	-16711903
	177	5	33	67	86	0	0	-15336713			177	5	33	34	55	0	0	-16713150		177	5	33	69	48	0	0	-16451271			177	5	33	115	56	5.452	1.09	-16409575			177	5	33	34	38	0	0	-16711900
	178	5	34	67	86	0	0	-16647174			178	5	34	34	55	0	0	-16712124		178	5	34	69	48	0	0	-15991507			178	5	34	121	59	3.855	0.771	-15814364			178	5	34	34	38	0	0	-16711890
	179	5	35	67	86	0	0	-16384007			179	5	35	34	55	0	0	-16712383		179	5	35	69	48	0	0	-16581574			179	5	35	122	60	0.813	0.163	-15685850			179	5	35	34	38	0	0	-16711897
	180	5	36	67	86	0	0	-16646145			180	5	36	35	56	0.812749	0.16255	-16188088		180	5	36	68	48	0.5747	0.11494	-15860951			180	5	36	127	60	2.873	0.575	-14769875			180	5	36	34	38	0	0	-16711894
	181	6	1	64	61	-1	-1	-16712182			181	6	1	67	36	-1	-1	-16711936		181	6	1	50	42	-1	-1	-15663335			181	6	1	131	66	-1	-1	-16123630			181	6	1	41	45	-1	-1	-16712192
	182	6	2	60	63	2.57014	0.514027	-16711912			182	6	2	65	42	3.63472	0.726944	-16450804		182	6	2	48	45	2.07211	0.414422	-16714240			182	6	2	129	66	1.149	0.23	-15147495			182	6	2	38	46	1.817	0.363	-16711936
	183	6	3	60	63	0	0	-16711924			183	6	3	64	40	1.28507	0.257014	-16711931		183	6	3	49	46	0.812749	0.16255	-16713472			183	6	3	125	74	5.14	1.028	-16217594			183	6	3	38	46	0	0	-16712959
	184	6	4	60	63	0	0	-16646381			184	6	4	62	46	3.63472	0.726944	-16711931		184	6	4	50	48	1.28507	0.257014	-16711936			184	6	4	119	78	4.144	0.829	-16085759			184	6	4	38	46	0	0	-16122089
	185	6	5	60	63	0	0	-15925989			185	6	5	62	46	0	0	-16449776		185	6	5	50	48	0	0	-16583670			185	6	5	114	79	2.93	0.586	-16735736			185	6	5	38	46	0	0	-15797486
	186	6	6	60	63	0	0	-16515301			186	6	6	61	46	0.5747	0.11494	-16712443		186	6	6	50	50	1.1494	0.22988	-16726528			186	6	6	114	79	0	0	-15875545			186	6	6	38	46	0	0	-16122101
	187	6	7	60	63	0	0	-16711918			187	6	7	62	46	0.5747	0.11494	-16715007		187	6	7	55	58	5.42171	1.08434	-14748121			187	6	7	114	79	0	0	-15945180			187	6	7	38	46	0	0	-16648185
	188	6	8	60	63	0	0	-16515302			188	6	8	62	47	0.5747	0.11494	-16727296		188	6	8	61	64	4.87649	0.975298	-16711929			188	6	8	114	79	0	0	-16405733			188	6	8	38	46	0	0	-16450293
	189	6	9	60	63	0	0	-16711918			189	6	9	64	51	2.57014	0.514027	-16719352		189	6	9	63	69	3.09485	0.618971	-16714225			189	6	9	116	80	1.285	0.257	-16726770			189	6	9	38	46	0	0	-16711929
	190	6	10	60	63	0	0	-16711931			190	6	10	67	52	1.81736	0.363472	-15341024		190	6	10	63	69	0	0	-16646391			190	6	10	116	80	0	0	-15939032			190	6	10	38	46	0	0	-16711929
	191	6	11	60	63	0	0	-16712945			191	6	11	69	49	2.07211	0.414422	-16713467		191	6	11	63	68	0.5747	0.11494	-16580864			191	6	11	116	80	0	0	-15875553			191	6	11	38	46	0	0	-16711930
	192	6	12	60	63	0	0	-16712696			192	6	12	69	49	0	0	-16711918		192	6	12	65	70	1.6255	0.325099	-16712192			192	6	12	116	80	0	0	-15482077			192	6	12	38	46	0	0	-16711930
	193	6	13	63	70	4.37678	0.875357	-16647905			193	6	13	69	49	0	0	-15665381		193	6	13	65	70	0	0	-16711933			193	6	13	116	80	0	0	-16336104			193	6	13	38	46	0	0	-16711928
	194	6	14	63	70	0	0	-16451027			194	6	14	77	56	6.10914	1.22183	-16717045		194	6	14	64	70	0.5747	0.11494	-16711936			194	6	14	116	80	0	0	-16007143			194	6	14	38	46	0	0	-16711929
	195	6	15	63	70	0	0	-16515798			195	6	15	77	59	1.7241	0.34482	-16450806		195	6	15	64	70	0	0	-16711936			195	6	15	116	80	0	0	-16733167			195	6	15	38	46	0	0	-16711928
	196	6	16	63	70	0	0	-16515308			196	6	16	79	56	2.07211	0.414422	-16711924		196	6	16	66	73	2.07211	0.414422	-16711923			196	6	16	116	80	0	0	-16077538			196	6	16	38	46	0	0	-16711915
	197	6	17	63	70	0	0	-16450279			197	6	17	79	54	1.1494	0.22988	-15731944		197	6	17	66	73	0	0	-16711930			197	6	17	115	81	0.813	0.163	-16741368			197	6	17	38	46	0	0	-16711924
	198	6	18	63	70	0	0	-16581352			198	6	18	79	53	0.5747	0.11494	-16321761		198	6	18	66	73	0	0	-16056814			198	6	18	115	81	0	0	-15749353			198	6	18	38	46	0	0	-16712697
	199	6	19	63	70	0	0	-16711904			199	6	19	79	53	0	0	-16729084		199	6	19	66	73	0	0	-16715264			199	6	19	115	81	0	0	-16741621			199	6	19	38	46	0	0	-16712183
	200	6	20	63	70	0	0	-16712931			200	6	20	79	53	0	0	-16730871		200	6	20	65	77	2.36955	0.47391	-16712188			200	6	20	115	81	0	0	-15891442			200	6	20	38	46	0	0	-16711923
	201	6	21	63	70	0	0	-16057552			201	6	21	79	48	2.8735	0.5747	-15275744		201	6	21	65	77	0	0	-16712952			201	6	21	115	81	0	0	-16753917			201	6	21	38	46	0	0	-16711919
	202	6	22	63	70	0	0	-16711915			202	6	22	77	49	1.28507	0.257014	-16715257		202	6	22	65	77	0	0	-16711918			202	6	22	102	87	8.228	1.646	-16014566			202	6	22	38	46	0	0	-16711919
	203	6	23	63	70	0	0	-16712941			203	6	23	77	49	0	0	-16714217		203	6	23	65	77	0	0	-16384236			203	6	23	96	92	4.489	0.898	-16290662			203	6	23	38	46	0	0	-16384231
	204	6	24	63	70	0	0	-16712685			204	6	24	77	55	3.4482	0.68964	-16520421		204	6	24	65	77	0	0	-16711915			204	6	24	96	92	0	0	-16091484			204	6	24	38	46	0	0	-16711912
	205	6	25	63	70	0	0	-16123361			205	6	25	77	59	2.2988	0.45976	-16734973		205	6	25	65	78	0.5747	0.11494	-16711921			205	6	25	96	92	0	0	-15961186			205	6	25	38	46	0	0	-16712948
	206	6	26	62	75	2.93041	0.586081	-16058557			206	6	26	75	58	1.28507	0.257014	-16730112		206	6	26	65	78	0	0	-16712439			206	6	26	96	92	0	0	-15961463			206	6	26	38	46	0	0	-16713447
	207	6	27	62	75	0	0	-16712130			207	6	27	74	58	0.5747	0.11494	-16321261		207	6	27	65	78	0	0	-16318683			207	6	27	96	92	0	0	-15637119			207	6	27	38	46	0	0	-16713197
	208	6	28	62	75	0	0	-16711882			208	6	28	74	58	0	0	-16721399		208	6	28	65	78	0	0	-16253149			208	6	28	96	92	0	0	-16028796			208	6	28	38	46	0	0	-16713188
	209	6	29	62	75	0	0	-16711886			209	6	29	68	61	3.8552	0.771041	-15747821		209	6	29	65	78	0	0	-16515285			209	6	29	91	91	2.93	0.586	-15362931			209	6	29	38	46	0	0	-16711911
	210	6	30	62	75	0	0	-16450780			210	6	30	68	61	0	0	-16735996		210	6	30	65	78	0	0	-15794906			210	6	30	91	91	0	0	-15428198			210	6	30	38	46	0	0	-16515303
	211	6	31	62	75	0	0	-16712399			211	6	31	61	61	4.0229	0.80458	-16738304		211	6	31	65	78	0	0	-16712162			211	6	31	91	91	0	0	-16741245			211	6	31	38	46	0	0	-16713202
	212	6	32	62	75	0	0	-16711887			212	6	32	62	58	1.81736	0.363472	-16728576		212	6	32	65	78	0	0	-15926492			212	6	32	91	91	0	0	-16676992			212	6	32	38	46	0	0	-16187621
	213	6	33	62	75	0	0	-16450780			213	6	33	67	57	2.93041	0.586081	-16728320		213	6	33	65	78	0	0	-16711903			213	6	33	91	91	0	0	-16613483			213	6	33	38	46	0	0	-16711917
	214	6	34	62	75	0	0	-16449738			214	6	34	67	60	1.7241	0.34482	-16718846		214	6	34	65	78	0	0	-16188884			214	6	34	91	91	0	0	-16547941			214	6	34	38	46	0	0	-16711921
	215	6	35	62	75	0	0	-16253901			215	6	35	62	61	2.93041	0.586081	-15794410		215	6	35	65	78	0	0	-16384206			215	6	35	91	91	0	0	-16286309			215	6	35	38	46	0	0	-16318693
	216	6	36	62	75	0	0	-16711889			216	6	36	55	61	4.0229	0.80458	-16719359		216	6	36	65	78	0	0	-16515301			216	6	36	91	91	0	0	-16156772			216	6	36	38	46	0	0	-16319459
	217	7	1	52	72	-1	-1	-16711909			217	7	1	94	77	-1	-1	-16122860		217	7	1	72	46	-1	-1	-16319988			217	7	1	115	103	-1	-1	-16122365			217	7	1	33	40	-1	-1	-16712704
	218	7	2	52	71	0.5747	0.11494	-16711898			218	7	2	90	75	2.57014	0.514027	-15670504		218	7	2	70	50	2.57014	0.514027	-16711922			218	7	2	112	106	2.438	0.488	-16711936			218	7	2	33	40	0	0	-16711923
	219	7	3	51	73	1.28507	0.257014	-16712665			219	7	3	90	78	1.7241	0.34482	-16385264		219	7	3	73	49	1.81736	0.363472	-16057584			219	7	3	109	104	2.072	0.414	-16580855			219	7	3	33	40	0	0	-16587245
	220	7	4	51	73	0	0	-16580816			220	7	4	92	82	2.57014	0.514027	-16320245		220	7	4	72	49	0.5747	0.11494	-16385011			220	7	4	104	102	3.095	0.619	-16713728			220	7	4	33	40	0	0	-16323560
	221	7	5	51	73	0	0	-16711887			221	7	5	92	82	0	0	-16581863		221	7	5	72	48	0.5747	0.11494	-16712441			221	7	5	97	102	4.023	0.805	-16059885			221	7	5	33	40	0	0	-16260588
	222	7	6	51	73	0	0	-16318924			222	7	6	92	82	0	0	-16318684		222	7	6	72	48	0	0	-16713216			222	7	6	97	102	0	0	-16711936			222	7	6	33	40	0	0	-16400084
	223	7	7	51	73	0	0	-16711885			223	7	7	92	82	0	0	-16189401		223	7	7	72	48	0	0	-16319216			223	7	7	92	97	4.064	0.813	-16326643			223	7	7	33	40	0	0	-16737536
	224	7	8	54	76	2.43825	0.487649	-16711893			224	7	8	91	81	0.812749	0.16255	-16712926		224	7	8	72	48	0	0	-16449780			224	7	8	92	97	0	0	-15674344			224	7	8	33	40	0	0	-16732656
	225	7	9	54	76	0	0	-16711868			225	7	9	89	81	1.1494	0.22988	-16713437		225	7	9	72	48	0	0	-16517867			225	7	9	86	89	5.747	1.149	-16331003			225	7	9	33	40	0	0	-15221978
	226	7	10	54	76	0	0	-16711881			226	7	10	89	81	0	0	-16712154		226	7	10	72	48	0	0	-16711920			226	7	10	84	84	3.095	0.619	-16134893			226	7	10	33	40	0	0	-15681248
	227	7	11	54	76	0	0	-16711887			227	7	11	89	80	0.5747	0.11494	-16711895		227	7	11	72	48	0	0	-16122341			227	7	11	84	82	1.149	0.23	-15402205			227	7	11	33	40	0	0	-16745980
	228	7	12	54	76	0	0	-16449729			228	7	12	88	79	0.812749	0.16255	-16187592		228	7	12	73	46	1.28507	0.257014	-16188653			228	7	12	84	82	0	0	-16527870			228	7	12	33	40	0	0	-16738554
	229	7	13	54	76	0	0	-16646343			229	7	13	88	74	2.8735	0.5747	-15797422		229	7	13	73	46	0	0	-16056814			229	7	13	84	74	4.598	0.92	-16658927			229	7	13	33	40	0	0	-16745216
	230	7	14	54	76	0	0	-16449738			230	7	14	83	76	3.09485	0.618971	-16517841		230	7	14	73	46	0	0	-16712192			230	7	14	80	74	2.299	0.46	-16594165			230	7	14	33	40	0	0	-16743168
	231	7	15	53	79	1.81736	0.363472	-16515781			231	7	15	82	75	0.812749	0.16255	-16712664		231	7	15	73	46	0	0	-16713726			231	7	15	80	74	0	0	-16730624			231	7	15	36	43	2.438	0.488	-16451520
	232	7	16	53	79	0	0	-16712635			232	7	16	81	73	1.28507	0.257014	-16451799		232	7	16	73	46	0	0	-16711927			232	7	16	80	74	0	0	-16335867			232	7	16	36	43	0	0	-16654801
	233	7	17	53	79	0	0	-16253103			233	7	17	81	72	0.5747	0.11494	-16711894		233	7	17	73	46	0	0	-16384762			233	7	17	80	74	0	0	-16736512			233	7	17	36	43	0	0	-15210693
	234	7	18	53	79	0	0	-16580788			234	7	18	81	72	0	0	-16711893		234	7	18	73	46	0	0	-16319216			234	7	18	78	74	1.149	0.23	-16727037			234	7	18	36	43	0	0	-16594141
	235	7	19	53	79	0	0	-16712888			235	7	19	81	72	0	0	-16711895		235	7	19	73	46	0	0	-16713464			235	7	19	78	74	0	0	-16727295			235	7	19	36	43	0	0	-16727777
	236	7	20	59	79	3.4482	0.68964	-15728797			236	7	20	81	72	0	0	-16122062		236	7	20	73	46	0	0	-16385011			236	7	20	78	74	0	0	-15614190			236	7	20	36	43	0	0	-16269284
	237	7	21	59	79	0	0	-16122009			237	7	21	81	72	0	0	-16515274		237	7	21	73	46	0	0	-16449790			237	7	21	75	71	2.438	0.488	-16734208			237	7	21	36	43	0	0	-16138214
	238	7	22	59	79	0	0	-16712895			238	7	22	81	72	0	0	-16713417		238	7	22	73	46	0	0	-16711923			238	7	22	75	71	0	0	-16731648			238	7	22	36	43	0	0	-16750073
	239	7	23	59	79	0	0	-16711851			239	7	23	81	72	0	0	-16711892		239	7	23	73	46	0	0	-16711936			239	7	23	75	71	0	0	-16140536			239	7	23	36	43	0	0	-16418022
	240	7	24	59	79	0	0	-16711856			240	7	24	81	72	0	0	-16711896		240	7	24	76	45	1.81736	0.363472	-16515309			240	7	24	73	70	1.285	0.257	-16529408			240	7	24	41	47	3.68	0.736	-16728508
	241	7	25	59	79	0	0	-16711859			241	7	25	81	72	0	0	-16646352		241	7	25	76	45	0	0	-16711919			241	7	25	73	70	0	0	-16737024			241	7	25	41	47	0	0	-16725950
	242	7	26	59	79	0	0	-16515757			242	7	26	81	72	0	0	-16712918		242	7	26	76	45	0	0	-16384240			242	7	26	73	70	0	0	-16739840			242	7	26	41	47	0	0	-16393903
	243	7	27	59	79	0	0	-16711853			243	7	27	81	72	0	0	-16712390		243	7	27	76	45	0	0	-16711918			243	7	27	68	72	3.095	0.619	-15417575			243	7	27	41	47	0	0	-16721581
	244	7	28	59	79	0	0	-16711846			244	7	28	81	72	0	0	-16711879		244	7	28	76	45	0	0	-16711913			244	7	28	68	70	1.149	0.23	-16731390			244	7	28	41	47	0	0	-16127895
	245	7	29	59	79	0	0	-16582053			245	7	29	81	72	0	0	-16711879		245	7	29	75	45	0.5747	0.11494	-16711909			245	7	29	68	70	0	0	-16732410			245	7	29	41	47	0	0	-15599773
	246	7	30	59	79	0	0	-16711845			246	7	30	81	72	0	0	-16711887		246	7	30	75	45	0	0	-16711926			246	7	30	68	70	0	0	-16271091			246	7	30	41	47	0	0	-16715183
	247	7	31	59	79	0	0	-16711816			247	7	31	84	66	3.8552	0.771041	-16259509		247	7	31	75	45	0	0	-16711936			247	7	31	68	70	0	0	-16598777			247	7	31	41	47	0	0	-16712877
	248	7	32	59	79	0	0	-16712336			248	7	32	84	66	0	0	-16715976		248	7	32	75	45	0	0	-16711923			248	7	32	68	70	0	0	-16728825			248	7	32	41	47	0	0	-16715173
	249	7	33	59	79	0	0	-16712857			249	7	33	81	70	2.8735	0.5747	-16515257		249	7	33	75	45	0	0	-16711925			249	7	33	68	70	0	0	-16734720			249	7	33	41	47	0	0	-16712355
	250	7	34	59	79	0	0	-16711815			250	7	34	81	70	0	0	-16646844		250	7	34	75	45	0	0	-16711930			250	7	34	68	70	0	0	-16139759			250	7	34	41	47	0	0	-16711836
	251	7	35	59	79	0	0	-16711823			251	7	35	81	70	0	0	-16384180		251	7	35	74	46	0.812749	0.16255	-16188399			251	7	35	67	73	1.817	0.363	-16006642			251	7	35	41	47	0	0	-16062895
	252	7	36	59	79	0	0	-16712333			252	7	36	81	70	0	0	-16712126		252	7	36	74	46	0	0	-16711931			252	7	36	67	73	0	0	-16404979			252	7	36	41	47	0	0	-16719552
	253	8	1	61	75	-1	-1	-16450527			253	8	1	42	53	-1	-1	-16711929		253	8	1	73	76	-1	-1	-16711935			253	8	1	212	155	-1	-1	-16711929			253	8	1	40	38	-1	-1	-16714240
	254	8	2	58	78	2.43825	0.487649	-16516345			254	8	2	42	59	3.4482	0.68964	-16711934		254	8	2	69	75	2.36955	0.47391	-16711925			254	8	2	202	161	6.702	1.34	-16058354			254	8	2	40	38	0	0	-15925487
	255	8	3	57	79	0.812749	0.16255	-16713448			255	8	3	42	58	0.5747	0.11494	-16711930		255	8	3	69	74	0.5747	0.11494	-16711932			255	8	3	186	163	9.267	1.853	-16384246			255	8	3	40	38	0	0	-15207122
	256	8	4	57	79	0	0	-16711908			256	8	4	42	58	0	0	-16711924		256	8	4	69	73	0.5747	0.11494	-16711936			256	8	4	178	165	4.739	0.948	-16646390			256	8	4	40	38	0	0	-14620110
	257	8	5	57	79	0	0	-16711913			257	8	5	42	58	0	0	-16711924		257	8	5	67	73	1.1494	0.22988	-16711933			257	8	5	178	165	0	0	-16449776			257	8	5	40	38	0	0	-14946501
	258	8	6	57	79	0	0	-15862983			258	8	6	42	58	0	0	-16711933		258	8	6	65	73	1.1494	0.22988	-16515323			258	8	6	178	165	0	0	-16390901			258	8	6	36	38	2.299	0.46	-16711920
	259	8	7	57	79	0	0	-16189639			259	8	7	44	56	1.6255	0.325099	-16711933		259	8	7	64	73	0.5747	0.11494	-16711930			259	8	7	177	171	3.496	0.699	-16318707			259	8	7	36	38	0	0	-16711916
	260	8	8	57	83	2.2988	0.45976	-16711889			260	8	8	45	56	0.5747	0.11494	-16581109		260	8	8	64	73	0	0	-16711936			260	8	8	177	171	0	0	-16122092			260	8	8	36	38	0	0	-16711886
	261	8	9	57	83	0	0	-16714213			261	8	9	45	56	0	0	-16713727		261	8	9	64	73	0	0	-16712698			261	8	9	177	171	0	0	-16389102			261	8	9	36	38	0	0	-16711880
	262	8	10	57	83	0	0	-16713163			262	8	10	45	54	1.1494	0.22988	-16715517		262	8	10	63	73	0.5747	0.11494	-16712960			262	8	10	170	167	4.633	0.927	-16717820			262	8	10	36	38	0	0	-16711880
	263	8	11	57	83	0	0	-16711895			263	8	11	46	53	0.812749	0.16255	-16321775		263	8	11	63	73	0	0	-16711929			263	8	11	170	167	0	0	-16455406			263	8	11	36	38	0	0	-16712371
	264	8	12	57	83	0	0	-16646334			264	8	12	52	49	4.14422	0.828844	-16519834		264	8	12	62	73	0.5747	0.11494	-16711934			264	8	12	170	167	0	0	-16654830			264	8	12	36	38	0	0	-16711860
	265	8	13	57	83	0	0	-15603386			265	8	13	52	47	1.1494	0.22988	-16711866		265	8	13	61	73	0.5747	0.11494	-16712703			265	8	13	170	167	0	0	-14886116			265	8	13	36	38	0	0	-16711835
	266	8	14	61	87	3.25099	0.650199	-16384213			266	8	14	52	46	0.5747	0.11494	-15794605		266	8	14	61	73	0	0	-16711926			266	8	14	170	167	0	0	-16266479			266	8	14	36	38	0	0	-16712850
	267	8	15	61	87	0	0	-16386006			267	8	15	56	43	2.8735	0.5747	-16713629		267	8	15	58	73	1.7241	0.34482	-16712448			267	8	15	170	167	0	0	-16731648			267	8	15	36	38	0	0	-16711841
	268	8	16	61	87	0	0	-16515270			268	8	16	65	45	5.29847	1.05969	-16735469		268	8	16	58	73	0	0	-16711936			268	8	16	170	167	0	0	-16730877			268	8	16	36	38	0	0	-16711836
	269	8	17	61	87	0	0	-16384198			269	8	17	65	45	0	0	-15876024		269	8	17	58	73	0	0	-16711936			269	8	17	175	168	2.93	0.586	-16711927			269	8	17	36	38	0	0	-16580754
	270	8	18	61	87	0	0	-16711885			270	8	18	65	45	0	0	-16276146		270	8	18	58	73	0	0	-16711936			270	8	18	175	168	0	0	-16712437			270	8	18	36	38	0	0	-16384141
	271	8	19	61	87	0	0	-16711881			271	8	19	77	53	8.28844	1.65769	-16739579		271	8	19	56	73	1.1494	0.22988	-16711934			271	8	19	175	168	0	0	-16646643			271	8	19	36	38	0	0	-16580761
	272	8	20	61	87	0	0	-16711884			272	8	20	74	56	2.43825	0.487649	-16125653		272	8	20	56	73	0	0	-16449790			272	8	20	175	168	0	0	-16712695			272	8	20	36	38	0	0	-16712393
	273	8	21	61	87	0	0	-16712151			273	8	21	68	67	7.20097	1.44019	-16254955		273	8	21	56	73	0	0	-16580857			273	8	21	175	168	0	0	-16711922			273	8	21	36	38	0	0	-16712657
	274	8	22	63	89	1.6255	0.325099	-16711885			274	8	22	68	67	0	0	-16646894		274	8	22	56	73	0	0	-16712960			274	8	22	175	168	0	0	-16711928			274	8	22	36	38	0	0	-16318675
	275	8	23	63	89	0	0	-16711854			275	8	23	68	67	0	0	-16123111		275	8	23	55	73	0.5747	0.11494	-16711930			275	8	23	175	168	0	0	-16712438			275	8	23	36	38	0	0	-16711890
	276	8	24	63	89	0	0	-16711874			276	8	24	68	67	0	0	-16385260		276	8	24	55	73	0	0	-16711936			276	8	24	175	168	0	0	-16714997			276	8	24	36	38	0	0	-16646348
	277	8	25	63	89	0	0	-16711865			277	8	25	68	67	0	0	-16712162		277	8	25	55	73	0	0	-16711936			277	8	25	175	168	0	0	-16713445			277	8	25	36	38	0	0	-16712151
	278	8	26	63	89	0	0	-16711866			278	8	26	68	67	0	0	-16711905		278	8	26	55	73	0	0	-16711936			278	8	26	175	168	0	0	-16713719			278	8	26	38	33	3.095	0.619	-16711845
	279	8	27	63	89	0	0	-16711867			279	8	27	68	67	0	0	-16711902		279	8	27	55	73	0	0	-16711936			279	8	27	175	168	0	0	-16711918			279	8	27	38	33	0	0	-16711833
	280	8	28	63	89	0	0	-16711863			280	8	28	69	70	1.81736	0.363472	-16188625		280	8	28	55	73	0	0	-16711931			280	8	28	175	168	0	0	-16741376			280	8	28	38	33	0	0	-16711846
	281	8	29	63	89	0	0	-16253110			281	8	29	69	70	0	0	-16516800		281	8	29	55	73	0	0	-16711936			281	8	29	175	168	0	0	-16706294			281	8	29	38	33	0	0	-16711858
	282	8	30	63	89	0	0	-16712874			282	8	30	69	70	0	0	-16123582		282	8	30	55	73	0	0	-16711936			282	8	30	160	143	16.755	3.351	-16764160			282	8	30	38	33	0	0	-16711854
	283	8	31	59	92	2.8735	0.5747	-16385164			283	8	31	69	70	0	0	-16188086		283	8	31	55	73	0	0	-16711936			283	8	31	141	105	24.416	4.883	-16722658			283	8	31	38	33	0	0	-16712370
	284	8	32	59	92	0	0	-16188046			284	8	32	69	70	0	0	-16385469		284	8	32	55	73	0	0	-16449792			284	8	32	132	98	6.553	1.311	-16721907			284	8	32	38	33	0	0	-16711867
	285	8	33	59	92	0	0	-16253090			285	8	33	69	70	0	0	-16712123		285	8	33	55	73	0	0	-16515327			285	8	33	119	92	8.228	1.646	-16398567			285	8	33	38	33	0	0	-16711865
	286	8	34	59	92	0	0	-15599783			286	8	34	69	70	0	0	-16385737		286	8	34	55	73	0	0	-16712704			286	8	34	104	92	8.62	1.724	-16741629			286	8	34	38	33	0	0	-16711869
	287	8	35	51	92	4.5976	0.91952	-15663518			287	8	35	69	70	0	0	-16451242		287	8	35	55	73	0	0	-15597810			287	8	35	97	93	4.064	0.813	-16722920			287	8	35	38	33	0	0	-16711849
	288	8	36	40	88	6.72669	1.34534	-16711876			288	8	36	69	70	0	0	-16385200		288	8	36	55	73	0	0	-16649974			288	8	36	97	93	0	0	-16722159			288	8	36	38	33	0	0	-16711865
	289	9	1	60	53	-1	-1	-16711900			289	9	1	20	45	-1	-1	-16711930		289	9	1	58	37	-1	-1	-16187635			289	9	1	70	94	-1	-1	-16647168			289	9	1	43	48	-1	-1	-16254954
	290	9	2	59	59	3.49576	0.699153	-16711907			290	9	2	24	44	2.36955	0.47391	-16515581		290	9	2	58	44	4.0229	0.80458	-15925489			290	9	2	69	93	0.813	0.163	-16711930			290	9	2	43	48	0	0	-16451554
	291	9	3	59	59	0	0	-16711893			291	9	3	25	41	1.81736	0.363472	-16581107		291	9	3	58	40	2.2988	0.45976	-16711936			291	9	3	66	92	1.817	0.363	-16646389			291	9	3	41	46	1.625	0.325	-16729074
	292	9	4	59	59	0	0	-16711887			292	9	4	25	40	0.5747	0.11494	-16516338		292	9	4	58	40	0	0	-16711936			292	9	4	66	92	0	0	-16711932			292	9	4	41	46	0	0	-16726006
	293	9	5	59	59	0	0	-15796159			293	9	5	25	40	0	0	-16451053		293	9	5	61	44	2.8735	0.5747	-16646641			293	9	5	66	92	0	0	-16712441			293	9	5	41	46	0	0	-15997925
	294	9	6	59	59	0	0	-16449979			294	9	6	25	40	0	0	-16450542		294	9	6	61	44	0	0	-16711917			294	9	6	66	92	0	0	-16581107			294	9	6	41	46	0	0	-15863007
	295	9	7	59	59	0	0	-16449728			295	9	7	26	42	1.28507	0.257014	-16123368		295	9	7	61	44	0	0	-16712425			295	9	7	66	92	0	0	-16712180			295	9	7	41	46	0	0	-15737062
	296	9	8	59	59	0	0	-16646604			296	9	8	26	42	0	0	-16385262		296	9	8	60	45	0.812749	0.16255	-16711899			296	9	8	66	92	0	0	-16449777			296	9	8	41	46	0	0	-16717035
	297	9	9	59	59	0	0	-16318673			297	9	9	26	42	0	0	-16711927		297	9	9	60	46	0.5747	0.11494	-16712165			297	9	9	66	92	0	0	-16715506			297	9	9	41	46	0	0	-16714735
	298	9	10	59	59	0	0	-16711888			298	9	10	26	42	0	0	-16712169		298	9	10	60	46	0	0	-16712168			298	9	10	66	92	0	0	-15863532			298	9	10	41	46	0	0	-16387819
	299	9	11	59	59	0	0	-16711892			299	9	11	28	42	1.1494	0.22988	-16646375		299	9	11	60	46	0	0	-16187596			299	9	11	73	85	5.689	1.138	-16066012			299	9	11	41	46	0	0	-16649703
	300	9	12	59	59	0	0	-16384725			300	9	12	26	44	1.6255	0.325099	-16255218		300	9	12	60	46	0	0	-16712916			300	9	12	73	85	0	0	-16071126			300	9	12	41	46	0	0	-16058856
	301	9	13	59	59	0	0	-16254677			301	9	13	26	44	0	0	-16712176		301	9	13	60	46	0	0	-16712919			301	9	13	73	85	0	0	-15808724			301	9	13	41	46	0	0	-16384486
	302	9	14	59	59	0	0	-16188874			302	9	14	26	44	0	0	-16711919		302	9	14	57	48	2.07211	0.414422	-16646346			302	9	14	73	85	0	0	-16095717			302	9	14	41	46	0	0	-16384751
	303	9	15	59	59	0	0	-15927257			303	9	15	26	44	0	0	-16384749		303	9	15	57	48	0	0	-16711877			303	9	15	81	76	6.92	1.384	-16581358			303	9	15	41	46	0	0	-16711919
	304	9	16	62	61	2.07211	0.414422	-16580789			304	9	16	26	44	0	0	-16712169		304	9	16	57	48	0	0	-16712640			304	9	16	87	72	4.144	0.829	-16516850			304	9	16	41	46	0	0	-16712695
	305	9	17	62	61	0	0	-16711869			305	9	17	26	44	0	0	-16646389		305	9	17	57	48	0	0	-16516283			305	9	17	87	72	0	0	-16712690			305	9	17	41	46	0	0	-16712426
	306	9	18	62	61	0	0	-16515262			306	9	18	26	44	0	0	-16712410		306	9	18	57	47	0.5747	0.11494	-16384194			306	9	18	87	72	0	0	-16712187			306	9	18	41	46	0	0	-16711932
	307	9	19	62	61	0	0	-16711890			307	9	19	26	44	0	0	-16123622		307	9	19	57	47	0	0	-16319181			307	9	19	87	72	0	0	-16449772			307	9	19	41	46	0	0	-16712434
	308	9	20	67	58	3.35105	0.67021	-16450203			308	9	20	26	44	0	0	-16711907		308	9	20	57	47	0	0	-16450770			308	9	20	87	72	0	0	-16711936			308	9	20	41	46	0	0	-16711920
	309	9	21	67	58	0	0	-16449694			309	9	21	26	44	0	0	-16581602		309	9	21	57	47	0	0	-16712140			309	9	21	87	72	0	0	-16711934			309	9	21	41	46	0	0	-16581610
	310	9	22	67	58	0	0	-15991192			310	9	22	26	44	0	0	-16646882		310	9	22	57	47	0	0	-16712382			310	9	22	87	72	0	0	-16711927			310	9	22	41	46	0	0	-16646890
	311	9	23	67	58	0	0	-16516250			311	9	23	26	45	0.5747	0.11494	-16385752		311	9	23	60	43	2.8735	0.5747	-16713183			311	9	23	87	72	0	0	-16712186			311	9	23	41	46	0	0	-16646892
	312	9	24	61	62	4.14422	0.828844	-16711887			312	9	24	26	45	0	0	-16450526		312	9	24	60	43	0	0	-16451548			312	9	24	87	72	0	0	-16717056			312	9	24	41	46	0	0	-16253676
	313	9	25	64	59	2.43825	0.487649	-16647071			313	9	25	26	45	0	0	-16646633		313	9	25	60	43	0	0	-16056542			313	9	25	87	72	0	0	-16731136			313	9	25	41	46	0	0	-16123368
	314	9	26	64	59	0	0	-16711859			314	9	26	26	45	0	0	-16449772		314	9	26	60	43	0	0	-16122830			314	9	26	98	75	6.553	1.311	-16646615			314	9	26	41	46	0	0	-16516068
	315	9	27	64	59	0	0	-16515749			315	9	27	26	45	0	0	-16122858		315	9	27	60	43	0	0	-15665104			315	9	27	98	75	0	0	-16581851			315	9	27	41	46	0	0	-16712683
	316	9	28	64	59	0	0	-16122529			316	9	28	26	45	0	0	-16451057		316	9	28	60	43	0	0	-16515274			316	9	28	98	75	0	0	-16712666			316	9	28	41	46	0	0	-16711917
	317	9	29	64	59	0	0	-15599508			317	9	29	27	42	1.81736	0.363472	-16319467		317	9	29	60	43	0	0	-15928776			317	9	29	98	75	0	0	-16711892			317	9	29	41	46	0	0	-16518368
	318	9	30	65	62	1.81736	0.363472	-16713108			318	9	30	27	42	0	0	-16712673		318	9	30	60	43	0	0	-16254151			318	9	30	98	75	0	0	-16384717			318	9	30	41	46	0	0	-16455131
	319	9	31	65	62	0	0	-16387235			319	9	31	28	46	2.36955	0.47391	-16516312		319	9	31	60	43	0	0	-15795648			319	9	31	98	75	0	0	-16711894			319	9	31	41	46	0	0	-16715745
	320	9	32	65	62	0	0	-16384655			320	9	32	28	46	0	0	-16515799		320	9	32	60	43	0	0	-16451017			320	9	32	98	75	0	0	-16712397			320	9	32	41	46	0	0	-16581602
	321	9	33	65	62	0	0	-16583070			321	9	33	28	46	0	0	-16319972		321	9	33	60	43	0	0	-16321201			321	9	33	98	75	0	0	-16711879			321	9	33	41	46	0	0	-16190692
	322	9	34	65	62	0	0	-15990923			322	9	34	28	46	0	0	-16646894		322	9	34	60	43	0	0	-16124599			322	9	34	98	75	0	0	-16449739			322	9	34	41	46	0	0	-16452323
	323	9	35	65	62	0	0	-16123031			323	9	35	28	46	0	0	-16711914		323	9	35	60	43	0	0	-16123057			323	9	35	98	75	0	0	-16384195			323	9	35	41	46	0	0	-16712930
	324	9	36	65	62	0	0	-16712860			324	9	36	28	46	0	0	-16646633		324	9	36	60	43	0	0	-15863496			324	9	36	98	75	0	0	-16647107			324	9	36	41	46	0	0	-16518627
	325	10	1	39	63	-1	-1	-16712675			325	10	1	73	94	-1	-1	-16583928		325	10	1	48	22	-1	-1	-15532269			325	10	1	104	55	-1	-1	-16515581			325	10	1	72	65	-1	-1	-16580862
	326	10	2	37	64	1.28507	0.257014	-16712160			326	10	2	76	99	3.35105	0.67021	-16126191		326	10	2	48	22	0	0	-16711936			326	10	2	103	57	1.285	0.257	-15794944			326	10	2	72	65	0	0	-16450542
	327	10	3	41	64	2.2988	0.45976	-16711908			327	10	3	69	101	4.18388	0.836776	-16122607		327	10	3	46	21	1.28507	0.257014	-16646389			327	10	3	98	51	4.489	0.898	-16712938			327	10	3	72	65	0	0	-16711910
	328	10	4	41	64	0	0	-16711923			328	10	4	69	101	0	0	-16717568		328	10	4	41	27	4.48855	0.89771	-16713216			328	10	4	98	51	0	0	-16711910			328	10	4	70	66	1.285	0.257	-16581342
	329	10	5	41	64	0	0	-16711904			329	10	5	69	101	0	0	-16266992		329	10	5	41	27	0	0	-16711936			329	10	5	98	51	0	0	-16711909			329	10	5	70	66	0	0	-16515289
	330	10	6	41	64	0	0	-16058328			330	10	6	62	93	6.10914	1.22183	-16396010		330	10	6	41	27	0	0	-16384248			330	10	6	98	51	0	0	-16646370			330	10	6	70	66	0	0	-16188886
	331	10	7	41	64	0	0	-15535315			331	10	7	56	93	3.4482	0.68964	-16729083		331	10	7	41	27	0	0	-16646902			331	10	7	98	51	0	0	-16711902			331	10	7	70	66	0	0	-16519384
	332	10	8	41	64	0	0	-16721634			332	10	8	51	90	3.35105	0.67021	-16724992		332	10	8	41	27	0	0	-16646384			332	10	8	98	51	0	0	-16711904			332	10	8	70	66	0	0	-15992527
	333	10	9	46	64	2.8735	0.5747	-16384717			333	10	9	44	85	4.94376	0.988751	-16720893		333	10	9	38	30	2.43825	0.487649	-16723712			333	10	9	96	49	1.625	0.325	-16515283			333	10	9	70	66	0	0	-16717288
	334	10	10	46	64	0	0	-16320219			334	10	10	44	85	0	0	-16728307		334	10	10	38	31	0.5747	0.11494	-15877885			334	10	10	96	49	0	0	-16712668			334	10	10	70	66	0	0	-16580821
	335	10	11	46	64	0	0	-15419090			335	10	11	45	77	4.63338	0.926676	-16760576		335	10	11	38	31	0	0	-14368737			335	10	11	90	44	4.489	0.898	-15865565			335	10	11	70	66	0	0	-16384717
	336	10	12	46	64	0	0	-16735715			336	10	12	37	64	8.77241	1.75448	-16590575		336	10	12	38	31	0	0	-16740352			336	10	12	90	44	0	0	-15733726			336	10	12	70	66	0	0	-16122834
	337	10	13	47	72	4.63338	0.926676	-16711887			337	10	13	37	56	4.5976	0.91952	-15991004		337	10	13	38	31	0	0	-15226338			337	10	13	90	44	0	0	-15863520			337	10	13	70	66	0	0	-16715991
	338	10	14	47	72	0	0	-16711905			338	10	14	36	54	1.28507	0.257014	-16122080		338	10	14	36	36	3.09485	0.618971	-15296484			338	10	14	84	36	5.747	1.149	-16735733			338	10	14	70	66	0	0	-16582866
	339	10	15	47	72	0	0	-16711901			339	10	15	36	54	0	0	-16713206		339	10	15	36	36	0	0	-14438103			339	10	15	84	36	0	0	-15608548			339	10	15	70	66	0	0	-15860161
	340	10	16	47	72	0	0	-16711891			340	10	16	36	54	0	0	-16711926		340	10	16	36	36	0	0	-16755712			340	10	16	80	36	2.299	0.46	-16727804			340	10	16	70	66	0	0	-16713161
	341	10	17	47	72	0	0	-16711911			341	10	17	36	54	0	0	-16713983		341	10	17	33	43	4.37678	0.875357	-15284711			341	10	17	80	36	0	0	-16715764			341	10	17	70	66	0	0	-15532218
	342	10	18	47	72	0	0	-16711900			342	10	18	36	54	0	0	-16711908		342	10	18	33	43	0	0	-16673787			342	10	18	80	36	0	0	-15994352			342	10	18	70	66	0	0	-16058050
	343	10	19	47	72	0	0	-16711913			343	10	19	36	54	0	0	-16711909		343	10	19	33	43	0	0	-16475643			343	10	19	80	36	0	0	-16713198			343	10	19	70	66	0	0	-15467186
	344	10	20	47	72	0	0	-16711910			344	10	20	36	54	0	0	-16711900		344	10	20	33	43	0	0	-16730876			344	10	20	80	36	0	0	-16716800			344	10	20	70	66	0	0	-16388799
	345	10	21	56	70	5.29847	1.05969	-16057516			345	10	21	36	54	0	0	-16711904		345	10	21	33	44	0.5747	0.11494	-14750180			345	10	21	72	34	4.739	0.948	-16057586			345	10	21	70	66	0	0	-15469490
	346	10	22	56	70	0	0	-16711857			346	10	22	36	53	0.5747	0.11494	-16711907		346	10	22	34	46	1.28507	0.257014	-15205868			346	10	22	72	34	0	0	-16647924			346	10	22	70	66	0	0	-16720077
	347	10	23	56	70	0	0	-16711877			347	10	23	36	53	0	0	-16713951		347	10	23	34	46	0	0	-14815458			347	10	23	72	34	0	0	-16318709			347	10	23	74	65	2.37	0.474	-16449728
	348	10	24	56	70	0	0	-16449703			348	10	24	41	43	6.42534	1.28507	-15674344		348	10	24	34	46	0	0	-15022307			348	10	24	72	34	0	0	-16715003			348	10	24	74	65	0	0	-16253630
	349	10	25	56	70	0	0	-16256427			349	10	25	41	44	0.5747	0.11494	-16720344		349	10	25	34	46	0	0	-16598015			349	10	25	72	34	0	0	-16187626			349	10	25	74	65	0	0	-16321224
	350	10	26	56	70	0	0	-16321992			350	10	26	41	44	0	0	-15731659		350	10	26	34	46	0	0	-15871731			350	10	26	72	34	0	0	-16449766			350	10	26	74	65	0	0	-16711859
	351	10	27	56	70	0	0	-16324312			351	10	27	41	44	0	0	-15665856		351	10	27	34	46	0	0	-15681507			351	10	27	72	34	0	0	-16449759			351	10	27	74	65	0	0	-16123582
	352	10	28	70	66	8.36776	1.67355	-16515249			352	10	28	41	44	0	0	-16253135		352	10	28	32	50	2.57014	0.514027	-16726528			352	10	28	67	33	2.93	0.586	-16712420			352	10	28	74	65	0	0	-16711866
	353	10	29	75	69	3.35105	0.67021	-16721348			353	10	29	41	44	0	0	-16719838		353	10	29	32	50	0	0	-16321274			353	10	29	67	33	0	0	-16255960			353	10	29	74	65	0	0	-16712397
	354	10	30	75	69	0	0	-16711859			354	10	30	41	44	0	0	-16253640		354	10	30	32	50	0	0	-16331004			354	10	30	67	33	0	0	-16711911			354	10	30	74	65	0	0	-16322757
	355	10	31	75	69	0	0	-16321466			355	10	31	49	38	5.747	1.1494	-16189602		355	10	31	32	50	0	0	-16668416			355	10	31	67	33	0	0	-16711909			355	10	31	74	65	0	0	-16711873
	356	10	32	75	69	0	0	-15474378			356	10	32	49	38	0	0	-16714146		356	10	32	32	50	0	0	-16729600			356	10	32	67	33	0	0	-16711905			356	10	32	74	65	0	0	-16712632
	357	10	33	75	69	0	0	-16746488			357	10	33	49	38	0	0	-16711813		357	10	33	32	50	0	0	-16203516			357	10	33	67	33	0	0	-16711904			357	10	33	74	65	0	0	-16711864
	358	10	34	86	72	6.55259	1.31052	-16711840			358	10	34	49	38	0	0	-16712060		358	10	34	32	50	0	0	-16723712			358	10	34	67	33	0	0	-16711905			358	10	34	74	65	0	0	-16451763
	359	10	35	86	72	0	0	-16449706			359	10	35	49	38	0	0	-16711799		359	10	35	32	50	0	0	-16724480			359	10	35	67	33	0	0	-16711915			359	10	35	74	65	0	0	-16711862
	360	10	36	86	72	0	0	-16253865			360	10	36	49	38	0	0	-16580729		360	10	36	32	50	0	0	-15992563			360	10	36	67	33	0	0	-16712678			360	10	36	74	65	0	0	-16715190
	361	11	1	111	87	-1	-1	-16711936			361	11	1	111	89	-1	-1	-16582579		361	11	1	50	62	-1	-1	-16318689			361	11	1	53	106	-1	-1	-16515809			361	11	1	138	188	-1	-1	-16751616
	362	11	2	115	86	2.36955	0.47391	-16062453			362	11	2	110	88	0.812749	0.16255	-15925689		362	11	2	49	58	2.37	0.474	-16712437			362	11	2	54	105	0.812749	0.16255	-15401680			362	11	2	137	188	0.5747	0.11494	-16752123
	363	11	3	115	86	0	0	-16711930			363	11	3	107	87	1.81736	0.363472	-16711864		363	11	3	49	58	0	0	-16711921			363	11	3	54	105	0	0	-16058078			363	11	3	140	189	1.81736	0.363472	-16614135
	364	11	4	114	86	0.5747	0.11494	-16727552			364	11	4	107	87	0	0	-16384163		364	11	4	49	58	0	0	-16711931			364	11	4	54	108	1.7241	0.34482	-16711913			364	11	4	140	189	0	0	-16745980
	365	11	5	113	86	0.5747	0.11494	-16726014			365	11	5	107	87	0	0	-16188337		365	11	5	49	58	0	0	-16515305			365	11	5	54	108	0	0	-16711906			365	11	5	140	189	0	0	-16353521
	366	11	6	113	86	0	0	-16724736			366	11	6	103	87	2.2988	0.45976	-16713917		366	11	6	46	56	2.072	0.414	-16646640			366	11	6	54	108	0	0	-16711908			366	11	6	140	189	0	0	-16744191
	367	11	7	113	86	0	0	-16663289			367	11	7	103	87	0	0	-16187574		367	11	7	46	56	0	0	-16712692			367	11	7	54	108	0	0	-16711905			367	11	7	140	189	0	0	-16742910
	368	11	8	113	86	0	0	-16733692			368	11	8	103	87	0	0	-16713138		368	11	8	46	56	0	0	-16711930			368	11	8	54	108	0	0	-16711901			368	11	8	140	189	0	0	-16738816
	369	11	9	113	86	0	0	-16539378			369	11	9	97	89	3.63472	0.726944	-16253642		369	11	9	46	56	0	0	-16713728			369	11	9	54	108	0	0	-15925460			369	11	9	140	189	0	0	-16736765
	370	11	10	113	86	0	0	-16216054			370	11	10	93	90	2.36955	0.47391	-16187609		370	11	10	46	56	0	0	-16712949			370	11	10	54	108	0	0	-16515285			370	11	10	140	189	0	0	-16670974
	371	11	11	119	92	4.87649	0.975298	-16717305			371	11	11	91	92	1.6255	0.325099	-16711899		371	11	11	46	56	0	0	-16584179			371	11	11	54	108	0	0	-15993047			371	11	11	140	189	0	0	-16742140
	372	11	12	119	92	0	0	-15737065			372	11	12	91	92	0	0	-16515282		372	11	12	46	56	0	0	-16719100			372	11	12	56	107	1.28507	0.257014	-15863259			372	11	12	140	189	0	0	-16741626
	373	11	13	119	92	0	0	-16198639			373	11	13	76	97	9.0868	1.81736	-16714960		373	11	13	47	52	2.37	0.474	-16452844			373	11	13	56	107	0	0	-16197099			373	11	13	140	189	0	0	-16741631
	374	11	14	119	92	0	0	-16408055			374	11	14	70	101	4.14422	0.828844	-15794386		374	11	14	47	52	0	0	-15665882			374	11	14	56	107	0	0	-15348698			374	11	14	140	189	0	0	-16472573
	375	11	15	119	91	0.5747	0.11494	-16480756			375	11	15	63	101	4.0229	0.80458	-14486228		375	11	15	47	52	0	0	-14420684			375	11	15	56	111	2.2988	0.45976	-16711915			375	11	15	140	189	0	0	-16736256
	376	11	16	119	91	0	0	-16736756			376	11	16	65	102	1.28507	0.257014	-16122844		376	11	16	47	52	0	0	-15804384			376	11	16	56	111	0	0	-16711900			376	11	16	140	189	0	0	-16734718
	377	11	17	119	91	0	0	-16473587			377	11	17	65	101	0.5747	0.11494	-16711897		377	11	17	47	52	0	0	-16197867			377	11	17	56	111	0	0	-16711913			377	11	17	140	189	0	0	-16727807
	378	11	18	119	91	0	0	-16141807			378	11	18	65	101	0	0	-16714967		378	11	18	47	52	0	0	-14559946			378	11	18	56	111	0	0	-16711920			378	11	18	140	189	0	0	-16131823
	379	11	19	119	91	0	0	-16470772			379	11	19	65	93	4.5976	0.91952	-16714198		379	11	19	47	52	0	0	-16074725			379	11	19	56	111	0	0	-16711913			379	11	19	140	189	0	0	-16721143
	380	11	20	119	91	0	0	-16727289			380	11	20	65	93	0	0	-16714717		380	11	20	47	52	0	0	-13843145			380	11	20	56	111	0	0	-16711909			380	11	20	140	189	0	0	-16647924
	381	11	21	119	91	0	0	-16732920			381	11	21	65	89	2.2988	0.45976	-15860948		381	11	21	47	52	0	0	-15355866			381	11	21	56	111	0	0	-16711912			381	11	21	140	189	0	0	-16714231
	382	11	22	119	91	0	0	-16668143			382	11	22	64	86	1.81736	0.363472	-16713189		382	11	22	47	52	0	0	-15884763			382	11	22	56	111	0	0	-16711916			382	11	22	140	189	0	0	-16711926
	383	11	23	119	91	0	0	-16734198			383	11	23	64	83	1.7241	0.34482	-16319710		383	11	23	50	57	3.351	0.67	-16716012			383	11	23	56	111	0	0	-16711916			383	11	23	140	189	0	0	-16711929
	384	11	24	119	91	0	0	-16736756			384	11	24	65	81	1.28507	0.257014	-16451045		384	11	24	50	57	0	0	-16058843			384	11	24	56	111	0	0	-16711904			384	11	24	140	189	0	0	-16318711
	385	11	25	119	91	0	0	-16738807			385	11	25	66	73	4.63338	0.926676	-16723196		385	11	25	50	57	0	0	-16449750			385	11	25	56	111	0	0	-16711916			385	11	25	140	189	0	0	-16646386
	386	11	26	119	91	0	0	-16750848			386	11	26	65	71	1.28507	0.257014	-16712436		386	11	26	50	57	0	0	-16719337			386	11	26	56	111	0	0	-16711925			386	11	26	140	189	0	0	-16711930
	387	11	27	119	91	0	0	-16749824			387	11	27	65	68	1.7241	0.34482	-16711886		387	11	27	50	57	0	0	-15864023			387	11	27	56	111	0	0	-16711898			387	11	27	140	189	0	0	-16711930
	388	11	28	119	91	0	0	-16754423			388	11	28	65	67	0.5747	0.11494	-16711885		388	11	28	50	57	0	0	-15543258			388	11	28	56	111	0	0	-16711924			388	11	28	140	189	0	0	-16711933
	389	11	29	122	86	3.35105	0.67021	-15728854			389	11	29	63	65	1.6255	0.325099	-16713391		389	11	29	50	57	0	0	-15600599			389	11	29	56	111	0	0	-16711909			389	11	29	140	189	0	0	-16711933
	390	11	30	122	86	0	0	-16735472			390	11	30	63	64	0.5747	0.11494	-15663310		390	11	30	50	57	0	0	-16522214			390	11	30	56	111	0	0	-16384201			390	11	30	140	189	0	0	-16711927
	391	11	31	122	86	0	0	-16734191			391	11	31	63	64	0	0	-15270593		391	11	31	50	57	0	0	-16192734			391	11	31	56	111	0	0	-16711882			391	11	31	133	184	4.94376	0.988751	-15934954
	392	11	32	122	86	0	0	-15944160			392	11	32	63	64	0	0	-15597743		392	11	32	50	57	0	0	-15797978			392	11	32	56	111	0	0	-16712165			392	11	32	133	184	0	0	-16647608
	393	11	33	122	89	1.7241	0.34482	-15607254			393	11	33	63	64	0	0	-16646332		393	11	33	50	57	0	0	-15273679			393	11	33	56	111	0	0	-16711903			393	11	33	133	184	0	0	-16711860
	394	11	34	122	89	0	0	-15280597			394	11	34	63	64	0	0	-16255673		394	11	34	50	57	0	0	-15998176			394	11	34	56	111	0	0	-16711885			394	11	34	133	184	0	0	-16711859
	395	11	35	122	89	0	0	-15867095			395	11	35	63	64	0	0	-16385968		395	11	35	50	57	0	0	-15735768			395	11	35	56	111	0	0	-16711887			395	11	35	133	184	0	0	-16515487
	396	11	36	122	89	0	0	-15733464			396	11	36	64	67	1.81736	0.363472	-16711889		396	11	36	50	57	0	0	-16460010			396	11	36	56	111	0	0	-16711897			396	11	36	133	184	0	0	-16714679
	397	12	1	92	93	-1	-1	-16712185			397	12	1	32	85	-1	-1	-16711912		397	12	1	72	76	-1	-1	-16318702			397	12	1	146	158	-1	-1	-16646321			397	12	1	98	122	-1	-1	-16711918
	398	12	2	92	93	0	0	-16711931			398	12	2	34	84	1.28507	0.257014	-16580856		398	12	2	70	77	1.285	0.257	-16646393			398	12	2	159	163	8.00464	1.60093	-16711936			398	12	2	98	122	0	0	-16712426
	399	12	3	92	93	0	0	-16497407			399	12	3	34	82	1.1494	0.22988	-16188382		399	12	3	70	77	0	0	-16580847			399	12	3	169	164	5.77566	1.15513	-16722163			399	12	3	97	122	0.5747	0.11494	-16711913
	400	12	4	98	91	3.63472	0.726944	-16734439			400	12	4	34	82	0	0	-16714229		400	12	4	70	77	0	0	-16450796			400	12	4	169	165	0.5747	0.11494	-16451055			400	12	4	96	120	1.28507	0.257014	-16254716
	401	12	5	113	90	8.63964	1.72793	-15864534			401	12	5	32	78	2.57014	0.514027	-16122068		401	12	5	70	77	0	0	-16188649			401	12	5	169	165	0	0	-16580862			401	12	5	96	120	0	0	-16712158
	402	12	6	111	87	2.07211	0.414422	-16711924			402	12	6	32	78	0	0	-16515294		402	12	6	70	77	0	0	-16188902			402	12	6	169	165	0	0	-16711920			402	12	6	96	120	0	0	-16711895
	403	12	7	111	87	0	0	-16711930			403	12	7	32	78	0	0	-16714480		403	12	7	69	73	2.37	0.474	-16711903			403	12	7	170	156	5.20413	1.04083	-16722677			403	12	7	96	120	0	0	-16711927
	404	12	8	111	87	0	0	-16711927			404	12	8	32	78	0	0	-16714720		404	12	8	69	73	0	0	-16711919			404	12	8	161	146	7.7318	1.54636	-16720124			404	12	8	96	120	0	0	-16253678
	405	12	9	111	87	0	0	-16253148			405	12	9	32	78	0	0	-16257715		405	12	9	69	73	0	0	-16711906			405	12	9	146	139	9.51298	1.9026	-16016619			405	12	9	96	120	0	0	-16516846
	406	12	10	111	87	0	0	-16715210			406	12	10	18	72	8.75357	1.75071	-16122101		406	12	10	69	73	0	0	-16711886			406	12	10	152	134	4.48855	0.89771	-15742688			406	12	10	104	118	4.7391	0.94782	-16711905
	407	12	11	111	87	0	0	-16747463			407	12	11	18	67	2.8735	0.5747	-16517624		407	12	11	69	73	0	0	-16711901			407	12	11	152	134	0	0	-16134113			407	12	11	104	118	0	0	-16711906
	408	12	12	111	87	0	0	-16760234			408	12	12	17	66	0.812749	0.16255	-16711920		408	12	12	69	73	0	0	-16712150			408	12	12	145	133	4.06374	0.812749	-16716786			408	12	12	104	118	0	0	-16711923
	409	12	13	117	84	3.8552	0.771041	-16711919			409	12	13	17	66	0	0	-16646892		409	12	13	69	73	0	0	-16449735			409	12	13	144	130	1.81736	0.363472	-16253401			409	12	13	104	118	0	0	-16711928
	410	12	14	117	84	0	0	-16580801			410	12	14	17	66	0	0	-16712172		410	12	14	77	75	4.739	0.948	-15992778			410	12	14	144	130	0	0	-16272096			410	12	14	112	112	5.747	1.1494	-16715753
	411	12	15	117	84	0	0	-16712105			411	12	15	17	66	0	0	-16711928		411	12	15	77	75	0	0	-16451268			411	12	15	138	126	4.14422	0.828844	-16717225			411	12	15	118	116	4.14422	0.828844	-16711922
	412	12	16	117	84	0	0	-15467689			412	12	16	17	66	0	0	-16646365		412	12	16	77	75	0	0	-16056751			412	12	16	133	121	4.06374	0.812749	-16318664			412	12	16	118	116	0	0	-16711917
	413	12	17	121	85	2.36955	0.47391	-16711897			413	12	17	20	71	3.35105	0.67021	-16711917		413	12	17	77	75	0	0	-15663799			413	12	17	133	122	0.5747	0.11494	-16319433			413	12	17	118	116	0	0	-16711905
	414	12	18	121	85	0	0	-16711878			414	12	18	25	71	2.8735	0.5747	-16721408		414	12	18	77	75	0	0	-16386229			414	12	18	133	122	0	0	-16319174			414	12	18	118	116	0	0	-16646375
	415	12	19	121	85	0	0	-16515241			415	12	19	25	74	1.7241	0.34482	-16715243		415	12	19	77	75	0	0	-15664826			415	12	19	133	122	0	0	-15925689			415	12	19	118	115	0.5747	0.11494	-16711919
	416	12	20	121	85	0	0	-16711850			416	12	20	25	73	0.5747	0.11494	-15401680		416	12	20	77	75	0	0	-16582070			416	12	20	133	122	0	0	-15734477			416	12	20	118	115	0	0	-16711921
	417	12	21	123	86	1.28507	0.257014	-16711839			417	12	21	27	73	1.1494	0.22988	-14944199		417	12	21	77	75	0	0	-16515507			417	12	21	133	122	0	0	-15600071			417	12	21	118	115	0	0	-16711927
	418	12	22	123	86	0	0	-16711816			418	12	22	29	73	1.1494	0.22988	-16651981		418	12	22	77	75	0	0	-16582318			418	12	22	133	122	0	0	-16062407			418	12	22	118	115	0	0	-16711912
	419	12	23	123	86	0	0	-16712052			419	12	23	29	75	1.1494	0.22988	-15859910		419	12	23	77	75	0	0	-16712628			419	12	23	133	122	0	0	-16724958			419	12	23	118	115	0	0	-16711912
	420	12	24	123	86	0	0	-16711782			420	12	24	29	75	0	0	-16718565		420	12	24	80	75	1.724	0.345	-16713145			420	12	24	133	122	0	0	-15738820			420	12	24	118	115	0	0	-16712172
	421	12	25	123	86	0	0	-16711756			421	12	25	29	75	0	0	-16384198		421	12	25	80	75	0	0	-16517061			421	12	25	133	122	0	0	-16464093			421	12	25	118	115	0	0	-16646358
	422	12	26	123	86	0	0	-15076667			422	12	26	29	75	0	0	-16711887		422	12	26	80	75	0	0	-15990964			422	12	26	131	124	1.6255	0.325099	-16651732			422	12	26	118	115	0	0	-16712159
	423	12	27	128	84	3.09485	0.618971	-16711882			423	12	27	29	75	0	0	-16715476		423	12	27	80	75	0	0	-16711869			423	12	27	131	124	0	0	-16384448			423	12	27	118	115	0	0	-16646632
	424	12	28	128	84	0	0	-16711864			424	12	28	29	75	0	0	-16450239		424	12	28	80	75	0	0	-16253132			424	12	28	131	124	0	0	-16449979			424	12	28	118	115	0	0	-16711911
	425	12	29	128	84	0	0	-16711871			425	12	29	29	75	0	0	-15663301		425	12	29	80	75	0	0	-16580802			425	12	29	131	124	0	0	-15795130			425	12	29	118	115	0	0	-16711919
	426	12	30	128	84	0	0	-16712611			426	12	30	29	75	0	0	-16714970		426	12	30	80	75	0	0	-16711881			426	12	30	131	124	0	0	-15861168			426	12	30	118	115	0	0	-16711897
	427	12	31	128	84	0	0	-16386201			427	12	31	29	75	0	0	-16259020		427	12	31	80	75	0	0	-16711876			427	12	31	131	124	0	0	-15665840			427	12	31	111	115	4.0229	0.80458	-16711864
	428	12	32	128	84	0	0	-15862419			428	12	32	32	73	2.07211	0.414422	-16728790		428	12	32	84	75	2.299	0.46	-15794346			428	12	32	131	124	0	0	-15670960			428	12	32	111	115	0	0	-16711872
	429	12	33	128	84	0	0	-16712346			429	12	33	33	72	0.812749	0.16255	-15145905		429	12	33	84	75	0	0	-16449733			429	12	33	131	124	0	0	-15884763			429	12	33	111	115	0	0	-16712384
	430	12	34	128	84	0	0	-16319624			430	12	34	33	72	0	0	-16735460		430	12	34	84	75	0	0	-16711876			430	12	34	131	124	0	0	-15488974			430	12	34	111	115	0	0	-16711863
	431	12	35	128	88	2.2988	0.45976	-16648035			431	12	35	33	72	0	0	-15088072		431	12	35	84	75	0	0	-16711872			431	12	35	129	119	3.09485	0.618971	-16592044			431	12	35	111	115	0	0	-16711850
	432	12	36	128	88	0	0	-16646240			432	12	36	37	69	2.8735	0.5747	-14494094		432	12	36	84	75	0	0	-16712130			432	12	36	127	115	2.57014	0.514027	-16726201			432	12	36	111	115	0	0	-16714416
	433	13	1	95	91	-1	-1	-16712172			433	13	1	38	91	-1	-1	-16711919		433	13	1	49	56	-1	-1	-15795166			433	13	1	133	103	-1	-1	-16726479			433	13	1	62	100	-1	-1	-16581097
	434	13	2	99	94	2.8735	0.5747	-16711891			434	13	2	36	90	1.28507	0.257014	-16318689		434	13	2	45	52	3.251	0.65	-16515565			434	13	2	129	93	6.18971	1.23794	-15740047			434	13	2	62	100	0	0	-16711903
	435	13	3	99	94	0	0	-16518064			435	13	3	34	87	2.07211	0.414422	-16646379		435	13	3	45	52	0	0	-16646641			435	13	3	127	90	2.07211	0.414422	-16648388			435	13	3	60	100	1.1494	0.22988	-15796185
	436	13	4	99	94	0	0	-16254141			436	13	4	34	87	0	0	-16711895		436	13	4	45	52	0	0	-16057817			436	13	4	126	86	2.36955	0.47391	-16715988			436	13	4	60	100	0	0	-15730897
	437	13	5	99	94	0	0	-16711860			437	13	5	34	87	0	0	-16711918		437	13	5	45	52	0	0	-16516319			437	13	5	126	86	0	0	-16714196			437	13	5	60	100	0	0	-16385250
	438	13	6	99	94	0	0	-16082864			438	13	6	29	85	3.09485	0.618971	-16515807		438	13	6	45	52	0	0	-16516060			438	13	6	116	85	5.77566	1.15513	-16736245			438	13	6	60	100	0	0	-16319695
	439	13	7	99	94	0	0	-16378560			439	13	7	30	85	0.5747	0.11494	-16057827		439	13	7	45	52	0	0	-16384212			439	13	7	123	83	4.18388	0.836776	-15926731			439	13	7	60	100	0	0	-15861966
	440	13	8	104	104	6.42534	1.28507	-16725223			440	13	8	30	85	0	0	-16646880		440	13	8	45	52	0	0	-16057803			440	13	8	123	83	0	0	-15406282			440	13	8	60	100	0	0	-16450269
	441	13	9	104	104	0	0	-16711896			441	13	9	30	85	0	0	-16581574		441	13	9	45	52	0	0	-16253891			441	13	9	116	85	4.18388	0.836776	-16727768			441	13	9	60	100	0	0	-15927244
	442	13	10	104	104	0	0	-15925446			442	13	10	30	85	0	0	-16254929		442	13	10	45	52	0	0	-16253652			442	13	10	115	85	0.5747	0.11494	-16467682			442	13	10	60	100	0	0	-16253899
	443	13	11	104	104	0	0	-16711888			443	13	11	30	85	0	0	-16385234		443	13	11	45	52	0	0	-16515268			443	13	11	103	84	6.9203	1.38406	-16263381			443	13	11	59	100	0.5747	0.11494	-15861441
	444	13	12	104	104	0	0	-16713428			444	13	12	30	85	0	0	-16188887		444	13	12	45	52	0	0	-16580787			444	13	12	92	80	6.72669	1.34534	-16534478			444	13	12	59	100	0	0	-16254149
	445	13	13	104	104	0	0	-16718046			445	13	13	30	85	0	0	-16712145		445	13	13	45	52	0	0	-16449716			445	13	13	81	76	6.72669	1.34534	-16589240			445	13	13	59	100	0	0	-16253891
	446	13	14	104	104	0	0	-16729336			446	13	14	30	85	0	0	-16516062		446	13	14	45	52	0	0	-16711875			446	13	14	80	76	0.5747	0.11494	-16723391			446	13	14	59	100	0	0	-15926983
	447	13	15	104	104	0	0	-16734955			447	13	15	31	88	1.81736	0.363472	-16122062		447	13	15	45	52	0	0	-15859901			447	13	15	78	79	2.07211	0.414422	-16132772			447	13	15	59	100	0	0	-16646591
	448	13	16	104	104	0	0	-16494828			448	13	16	31	88	0	0	-16581574		448	13	16	45	52	0	0	-16319423			448	13	16	78	79	0	0	-16397233			448	13	16	59	100	0	0	-16188611
	449	13	17	104	104	0	0	-16632564			449	13	17	31	88	0	0	-16450760		449	13	17	45	52	0	0	-16449733			449	13	17	78	79	0	0	-16199345			449	13	17	59	100	0	0	-16057789
	450	13	18	112	110	5.747	1.1494	-16734696			450	13	18	31	88	0	0	-16384199		450	13	18	45	52	0	0	-16711871			450	13	18	78	79	0	0	-16458926			450	13	18	59	100	0	0	-16711857
	451	13	19	118	107	3.8552	0.771041	-16196568			451	13	19	31	88	0	0	-16712145		451	13	19	45	52	0	0	-16711885			451	13	19	78	79	0	0	-16592563			451	13	19	59	100	0	0	-16188597
	452	13	20	118	107	0	0	-16717271			452	13	20	31	88	0	0	-16713168		452	13	20	45	52	0	0	-16122557			452	13	20	78	79	0	0	-16727228			452	13	20	59	100	0	0	-16711850
	453	13	21	118	107	0	0	-16722663			453	13	21	31	88	0	0	-16384197		453	13	21	45	52	0	0	-16385716			453	13	21	78	79	0	0	-16527279			453	13	21	59	99	0.5747	0.11494	-15926967
	454	13	22	118	107	0	0	-16719852			454	13	22	31	88	0	0	-16711892		454	13	22	45	52	0	0	-16449740			454	13	22	78	79	0	0	-16400574			454	13	22	59	99	0	0	-16450734
	455	13	23	118	107	0	0	-16723435			455	13	23	31	88	0	0	-16712151		455	13	23	45	52	0	0	-16319676			455	13	23	78	79	0	0	-16659116			455	13	23	59	99	0	0	-15992236
	456	13	24	118	107	0	0	-16070113			456	13	24	31	88	0	0	-16253133		456	13	24	48	48	2.873	0.575	-16711901			456	13	24	78	79	0	0	-16727495			456	13	24	61	96	2.07211	0.414422	-16515521
	457	13	25	118	107	0	0	-16731626			457	13	25	31	88	0	0	-16712412		457	13	25	48	48	0	0	-16712133			457	13	25	78	79	0	0	-16399280			457	13	25	61	96	0	0	-16188322
	458	13	26	118	107	0	0	-16612595			458	13	26	31	88	0	0	-16713694		458	13	26	48	48	0	0	-16122331			458	13	26	78	79	0	0	-16729018			458	13	26	61	96	0	0	-16188599
	459	13	27	118	107	0	0	-16743158			459	13	27	31	88	0	0	-16711902		459	13	27	48	48	0	0	-16711882			459	13	27	78	79	0	0	-16065452			459	13	27	61	96	0	0	-16580795
	460	13	28	118	107	0	0	-16750072			460	13	28	31	88	0	0	-16711892		460	13	28	48	48	0	0	-16711873			460	13	28	78	79	0	0	-16066992			460	13	28	61	96	0	0	-15990908
	461	13	29	117	103	2.36955	0.47391	-16719327			461	13	29	31	88	0	0	-16187586		461	13	29	48	48	0	0	-16711870			461	13	29	78	79	0	0	-16725697			461	13	29	61	96	0	0	-16646281
	462	13	30	117	103	0	0	-16719072			462	13	30	31	88	0	0	-16711890		462	13	30	48	48	0	0	-16711881			462	13	30	78	79	0	0	-16725171			462	13	30	61	96	0	0	-16711857
	463	13	31	117	103	0	0	-15996623			463	13	31	33	87	1.28507	0.257014	-16712647		463	13	31	48	48	0	0	-16581317			463	13	31	78	79	0	0	-16132785			463	13	31	61	96	0	0	-16646291
	464	13	32	117	103	0	0	-15932626			464	13	32	33	87	0	0	-16581819		464	13	32	48	48	0	0	-16712399			464	13	32	78	79	0	0	-16332723			464	13	32	61	96	0	0	-16711827
	465	13	33	117	103	0	0	-15801559			465	13	33	33	85	1.1494	0.22988	-16714940		465	13	33	48	48	0	0	-16712914			465	13	33	78	79	0	0	-16330913			465	13	33	61	96	0	0	-16711823
	466	13	34	117	103	0	0	-16259022			466	13	34	38	84	2.93041	0.586081	-16711894		466	13	34	48	48	0	0	-16712903			466	13	34	78	79	0	0	-16723129			466	13	34	61	96	0	0	-16253821
	467	13	35	117	103	0	0	-16197323			467	13	35	38	84	0	0	-16253129		467	13	35	48	48	0	0	-16646856			467	13	35	78	79	0	0	-16195236			467	13	35	61	95	0.5747	0.11494	-16450947
	468	13	36	118	105	1.28507	0.257014	-16711897			468	13	36	38	84	0	0	-16123345		468	13	36	48	48	0	0	-16449743			468	13	36	78	79	0	0	-15997087			468	13	36	61	95	0	0	-16711837
	469	14	1	67	68	-1	-1	-16713978			469	14	1	66	100	-1	-1	-16711861		469	14	1	49	45	-1	-1	-16711915			469	14	1	235	162	-1	-1	-16258752			469	14	1	88	51	-1	-1	-16711877
	470	14	2	67	65	1.7241	0.34482	-16515312			470	14	2	67	96	2.36955	0.47391	-16449677		470	14	2	50	47	1.285	0.257	-16711901			470	14	2	234	161	0.812749	0.16255	-16388036			470	14	2	88	51	0	0	-16711890
	471	14	3	67	65	0	0	-16711930			471	14	3	67	91	2.8735	0.5747	-15663191		471	14	3	50	47	0	0	-16712416			471	14	3	237	162	1.81736	0.363472	-16733655			471	14	3	88	51	0	0	-16711880
	472	14	4	67	65	0	0	-16718336			472	14	4	67	91	0	0	-16318508		472	14	4	50	47	0	0	-16646363			472	14	4	237	162	0	0	-16733396			472	14	4	87	51	0.5747	0.11494	-16711885
	473	14	5	67	65	0	0	-16712945			473	14	5	67	90	0.5747	0.11494	-15861257		473	14	5	50	47	0	0	-16384725			473	14	5	237	162	0	0	-16733914			473	14	5	87	51	0	0	-16711876
	474	14	6	67	65	0	0	-16714233			474	14	6	67	85	2.8735	0.5747	-16711759		474	14	6	50	47	0	0	-16711903			474	14	6	242	166	3.67988	0.735975	-16599755			474	14	6	87	51	0	0	-16711884
	475	14	7	67	65	0	0	-16056560			475	14	7	67	82	1.7241	0.34482	-16713890		475	14	7	50	47	0	0	-16711902			475	14	7	245	162	2.8735	0.5747	-16343505			475	14	7	87	51	0	0	-16711880
	476	14	8	67	65	0	0	-16714991			476	14	8	68	80	1.28507	0.257014	-16711875		476	14	8	50	47	0	0	-16515807			476	14	8	245	162	0	0	-16341197			476	14	8	87	51	0	0	-16711876
	477	14	9	67	65	0	0	-16062188			477	14	9	67	78	1.28507	0.257014	-16714484		477	14	9	50	47	0	0	-16711895			477	14	9	245	162	0	0	-16672981			477	14	9	87	51	0	0	-16712133
	478	14	10	68	69	2.36955	0.47391	-16711928			478	14	10	52	75	8.79122	1.75824	-15865060		478	14	10	50	47	0	0	-16515547			478	14	10	249	162	2.2988	0.45976	-16408266			478	14	10	87	51	0	0	-16711895
	479	14	11	68	69	0	0	-16319711			479	14	11	45	74	4.06374	0.812749	-15401168		479	14	11	50	47	0	0	-16713436			479	14	11	249	163	0.5747	0.11494	-16734157			479	14	11	87	51	0	0	-16711883
	480	14	12	68	69	0	0	-16649184			480	14	12	40	77	3.35105	0.67021	-16725230		480	14	12	50	47	0	0	-16449757			480	14	12	249	163	0	0	-16733127			480	14	12	87	51	0	0	-16711872
	481	14	13	68	69	0	0	-16322543			481	14	13	41	84	4.06374	0.812749	-16735468		481	14	13	50	47	0	0	-15794400			481	14	13	249	163	0	0	-16209360			481	14	13	87	51	0	0	-16711884
	482	14	14	73	67	3.09485	0.618971	-16386543			482	14	14	42	85	0.812749	0.16255	-14232775		482	14	14	50	47	0	0	-16711901			482	14	14	259	161	5.86081	1.17216	-16724410			482	14	14	87	51	0	0	-16711886
	483	14	15	73	66	0.5747	0.11494	-15859932			483	14	15	42	85	0	0	-15935447		483	14	15	50	47	0	0	-16711919			483	14	15	259	157	2.2988	0.45976	-16402101			483	14	15	87	51	0	0	-16711891
	484	14	16	73	66	0	0	-15991772			484	14	16	42	85	0	0	-16718298		484	14	16	50	47	0	0	-16711908			484	14	16	258	155	1.28507	0.257014	-16268990			484	14	16	87	51	0	0	-16711878
	485	14	17	73	66	0	0	-16711912			485	14	17	45	90	3.35105	0.67021	-15415758		485	14	17	50	47	0	0	-16716273			485	14	17	258	155	0	0	-16660147			485	14	17	87	51	0	0	-16711885
	486	14	18	73	66	0	0	-16580840			486	14	18	45	90	0	0	-16738560		486	14	18	50	47	0	0	-16580828			486	14	18	258	155	0	0	-16667572			486	14	18	87	51	0	0	-16711884
	487	14	19	73	66	0	0	-16712945			487	14	19	45	90	0	0	-15541713		487	14	19	50	47	0	0	-16580824			487	14	19	250	153	4.7391	0.94782	-15742652			487	14	19	87	51	0	0	-16711877
	488	14	20	73	66	0	0	-16714474			488	14	20	45	90	0	0	-16733440		488	14	20	50	47	0	0	-16714473			488	14	20	253	151	2.07211	0.414422	-16526501			488	14	20	87	51	0	0	-16711881
	489	14	21	73	66	0	0	-16711909			489	14	21	45	90	0	0	-16724189		489	14	21	50	47	0	0	-16449742			489	14	21	253	151	0	0	-16327582			489	14	21	87	51	0	0	-16711874
	490	14	22	76	66	1.7241	0.34482	-16711908			490	14	22	45	90	0	0	-15470027		490	14	22	50	47	0	0	-16646358			490	14	22	253	151	0	0	-16460959			490	14	22	87	51	0	0	-16711884
	491	14	23	76	66	0	0	-16711915			491	14	23	45	90	0	0	-15668936		491	14	23	50	47	0	0	-16711892			491	14	23	253	151	0	0	-16267420			491	14	23	87	51	0	0	-16711875
	492	14	24	76	66	0	0	-16711914			492	14	24	45	90	0	0	-15535800		492	14	24	50	47	0	0	-16384207			492	14	24	252	149	1.28507	0.257014	-16732849			492	14	24	87	51	0	0	-16711877
	493	14	25	76	66	0	0	-16515296			493	14	25	45	90	0	0	-16321994		493	14	25	50	47	0	0	-16712136			493	14	25	252	149	0	0	-16142753			493	14	25	87	51	0	0	-16711890
	494	14	26	76	66	0	0	-16712169			494	14	26	45	90	0	0	-14943422		494	14	26	50	47	0	0	-16384189			494	14	26	252	149	0	0	-16345019			494	14	26	87	51	0	0	-16711882
	495	14	27	76	66	0	0	-16711907			495	14	27	45	90	0	0	-16722152		495	14	27	50	47	0	0	-16712642			495	14	27	252	145	2.2988	0.45976	-15629548			495	14	27	87	51	0	0	-16712134
	496	14	28	76	66	0	0	-16711907			496	14	28	45	90	0	0	-16522443		496	14	28	50	47	0	0	-16711871			496	14	28	242	134	8.54353	1.70871	-16355304			496	14	28	87	51	0	0	-16711876
	497	14	29	76	66	0	0	-16711908			497	14	29	45	90	0	0	-16730088		497	14	29	50	47	0	0	-16712613			497	14	29	223	125	12.0824	2.41648	-16396172			497	14	29	87	51	0	0	-16515248
	498	14	30	76	66	0	0	-16123094			498	14	30	47	94	2.57014	0.514027	-16728017		498	14	30	50	47	0	0	-16253119			498	14	30	201	126	12.6565	2.53129	-16013969			498	14	30	87	51	0	0	-16646339
	499	14	31	76	66	0	0	-16254166			499	14	31	46	93	0.812749	0.16255	-16721339		499	14	31	50	47	0	0	-16319659			499	14	31	191	125	5.77566	1.15513	-16601749			499	14	31	87	51	0	0	-16646844
	500	14	32	76	66	0	0	-15012295			500	14	32	46	93	0	0	-16723408		500	14	32	50	47	0	0	-16711844			500	14	32	188	123	2.07211	0.414422	-16737714			500	14	32	87	51	0	0	-16646328
	501	14	33	76	66	0	0	-15799758			501	14	33	46	93	0	0	-15532207		501	14	33	50	47	0	0	-16253085			501	14	33	186	121	1.6255	0.325099	-16080297			501	14	33	87	51	0	0	-16711868
	502	14	34	76	66	0	0	-15667152			502	14	34	46	93	0	0	-15341729		502	14	34	50	47	0	0	-16711850			502	14	34	186	121	0	0	-16739782			502	14	34	87	51	0	0	-16580799
	503	14	35	76	66	0	0	-14949314			503	14	35	46	93	0	0	-16723928		503	14	35	50	47	0	0	-16711839			503	14	35	186	121	0	0	-16749012			503	14	35	87	51	0	0	-16711852
	504	14	36	76	66	0	0	-15864013			504	14	36	47	93	0.5747	0.11494	-16516024		504	14	36	50	47	0	0	-16711853			504	14	36	186	121	0	0	-16752606			504	14	36	87	51	0	0	-16449709
	505	15	1	71	103	-1	-1	-16392446			505	15	1	148	120	-1	-1	-16711932		505	15	1	41	29	-1	-1	-16515292			505	15	1	204	163	-1	-1	-15140826			505	15	1	72	71	-1	-1	-15402181
	506	15	2	73	100	2.07211	0.414422	-16713720			506	15	2	152	112	5.14027	1.02805	-16711932		506	15	2	44	29	1.724	0.345	-16580844			506	15	2	200	161	2.57014	0.514027	-16711917			506	15	2	71	72	0.812749	0.16255	-16711875
	507	15	3	73	100	0	0	-16711936			507	15	3	152	112	0	0	-15285736		507	15	3	44	29	0	0	-16712944			507	15	3	200	160	0.5747	0.11494	-16318694			507	15	3	71	72	0	0	-16711871
	508	15	4	73	100	0	0	-16711936			508	15	4	154	102	5.86081	1.17216	-14949089		508	15	4	44	29	0	0	-16646641			508	15	4	200	160	0	0	-16711920			508	15	4	71	72	0	0	-15663287
	509	15	5	73	100	0	0	-16711936			509	15	5	152	95	4.18388	0.836776	-16731904		509	15	5	44	29	0	0	-16646643			509	15	5	200	160	0	0	-16318685			509	15	5	71	72	0	0	-16515248
	510	15	6	73	100	0	0	-16711936			510	15	6	153	79	9.21314	1.84263	-15934450		510	15	6	44	29	0	0	-16384752			510	15	6	200	160	0	0	-16058854			510	15	6	67	71	2.36955	0.47391	-16515258
	511	15	7	73	100	0	0	-16711930			511	15	7	153	51	16.0916	3.21832	-15404008		511	15	7	44	29	0	0	-16711923			511	15	7	199	158	1.28507	0.257014	-16268248			511	15	7	67	71	0	0	-16449739
	512	15	8	73	100	0	0	-16711932			512	15	8	153	37	8.0458	1.60916	-16669183		512	15	8	44	29	0	0	-16712180			512	15	8	197	157	1.28507	0.257014	-15728838			512	15	8	67	71	0	0	-16711870
	513	15	9	73	100	0	0	-16711930			513	15	9	153	22	8.6205	1.7241	-15859943		513	15	9	44	29	0	0	-16515832			513	15	9	196	155	1.28507	0.257014	-14880451			513	15	9	67	71	0	0	-16711872
	514	15	10	76	99	1.81736	0.363472	-16385260			514	15	10	152	14	4.63338	0.926676	-16449777		514	15	10	44	29	0	0	-16711920			514	15	10	196	155	0	0	-15209161			514	15	10	67	71	0	0	-16711885
	515	15	11	76	99	0	0	-16385003			515	15	11	151	7	4.06374	0.812749	-15597799		515	15	11	44	29	0	0	-16122860			515	15	11	193	160	3.35105	0.67021	-15805150			515	15	11	72	69	3.09485	0.618971	-16318639
	516	15	12	76	99	0	0	-16582128			516	15	12	151	7	0	0	-16715520		516	15	12	44	29	0	0	-16647153			516	15	12	198	156	3.67988	0.735975	-16070103			516	15	12	72	69	0	0	-16713165
	517	15	13	76	99	0	0	-16384500			517	15	13	151	7	0	0	-16711919		517	15	13	44	29	0	0	-16712947			517	15	13	194	156	2.2988	0.45976	-16712163			517	15	13	72	69	0	0	-16256451
	518	15	14	76	99	0	0	-16450291			518	15	14	149	6	1.28507	0.257014	-16713707		518	15	14	44	29	0	0	-16646388			518	15	14	194	156	0	0	-16712412			518	15	14	72	69	0	0	-16187589
	519	15	15	76	99	0	0	-16188659			519	15	15	149	6	0	0	-16711913		519	15	15	44	29	0	0	-16713461			519	15	15	194	156	0	0	-16712411			519	15	15	72	69	0	0	-15925435
	520	15	16	76	99	0	0	-16646892			520	15	16	149	6	0	0	-15794397		520	15	16	44	29	0	0	-16712181			520	15	16	194	156	0	0	-16318665			520	15	16	72	69	0	0	-16188096
	521	15	17	76	99	0	0	-16581107			521	15	17	149	6	0	0	-16711922		521	15	17	50	26	3.855	0.771	-16711924			521	15	17	193	156	0.5747	0.11494	-16711895			521	15	17	72	69	0	0	-15991222
	522	15	18	76	99	0	0	-16711926			522	15	18	149	6	0	0	-15991013		522	15	18	50	26	0	0	-16580849			522	15	18	188	153	3.35105	0.67021	-15080138			522	15	18	72	69	0	0	-15271349
	523	15	19	76	99	0	0	-16711903			523	15	19	149	6	0	0	-16716525		523	15	19	50	26	0	0	-16711922			523	15	19	182	145	5.747	1.1494	-16203491			523	15	19	72	69	0	0	-15794352
	524	15	20	76	99	0	0	-16450796			524	15	20	149	6	0	0	-16719332		524	15	20	50	26	0	0	-16712182			524	15	20	172	137	7.35975	1.47195	-15869903			524	15	20	72	69	0	0	-15925419
	525	15	21	76	99	0	0	-16711919			525	15	21	149	6	0	0	-16715490		525	15	21	50	26	0	0	-16711916			525	15	21	157	130	9.51298	1.9026	-16418022			525	15	21	70	72	2.07211	0.414422	-16712325
	526	15	22	76	99	0	0	-16449759			526	15	22	149	6	0	0	-15865301		526	15	22	50	26	0	0	-16712686			526	15	22	131	108	19.5736	3.91472	-16661472			526	15	22	70	72	0	0	-16188549
	527	15	23	76	99	0	0	-16515308			527	15	23	149	6	0	0	-16725248		527	15	23	50	26	0	0	-16646379			527	15	23	131	108	0	0	-16012248			527	15	23	70	72	0	0	-16711787
	528	15	24	76	99	0	0	-16713966			528	15	24	149	13	4.0229	0.80458	-15796447		528	15	24	50	26	0	0	-16711912			528	15	24	131	108	0	0	-16080079			528	15	24	70	72	0	0	-16580714
	529	15	25	76	99	0	0	-16189154			529	15	25	149	12	0.5747	0.11494	-14747611		529	15	25	50	26	0	0	-16646368			529	15	25	131	108	0	0	-16476372			529	15	25	70	72	0	0	-16711782
	530	15	26	78	100	1.28507	0.257014	-16122088			530	15	26	149	12	0	0	-14814680		530	15	26	50	26	0	0	-16385252			530	15	26	131	108	0	0	-15687115			530	15	26	70	72	0	0	-16320615
	531	15	27	78	100	0	0	-16711923			531	15	27	149	12	0	0	-15803109		531	15	27	50	26	0	0	-16711896			531	15	27	127	108	2.2988	0.45976	-16735980			531	15	27	70	72	0	0	-16385639
	532	15	28	78	100	0	0	-15861210			532	15	28	149	12	0	0	-16716782		532	15	28	50	26	0	0	-16515298			532	15	28	127	108	0	0	-16336080			532	15	28	70	72	0	0	-15666530
	533	15	29	78	100	0	0	-16711936			533	15	29	149	12	0	0	-15075546		533	15	29	50	26	0	0	-16646882			533	15	29	127	108	0	0	-16336862			533	15	29	70	72	0	0	-16646495
	534	15	30	78	100	0	0	-16711915			534	15	30	149	12	0	0	-15928800		534	15	30	50	26	0	0	-16515291			534	15	30	127	108	0	0	-16470227			534	15	30	70	72	0	0	-15861052
	535	15	31	80	99	1.28507	0.257014	-16711927			535	15	31	149	12	0	0	-14618581		535	15	31	50	26	0	0	-16711904			535	15	31	127	108	0	0	-16337871			535	15	31	70	72	0	0	-15468590
	536	15	32	80	99	0	0	-16711910			536	15	32	149	12	0	0	-15477475		536	15	32	50	26	0	0	-16712409			536	15	32	127	108	0	0	-16733146			536	15	32	70	72	0	0	-16254771
	537	15	33	80	99	0	0	-16711907			537	15	33	149	12	0	0	-15342817		537	15	33	50	26	0	0	-16646356			537	15	33	127	108	0	0	-16733404			537	15	33	70	72	0	0	-15731247
	538	15	34	81	98	0.812749	0.16255	-16711904			538	15	34	152	12	1.7241	0.34482	-15928282		538	15	34	50	26	0	0	-16580816			538	15	34	127	108	0	0	-15942074			538	15	34	70	72	0	0	-15533595
	539	15	35	81	98	0	0	-16713180			539	15	35	152	12	0	0	-15731408		539	15	35	50	26	0	0	-16319184			539	15	35	127	108	0	0	-16008396			539	15	35	70	72	0	0	-15860230
	540	15	36	81	98	0	0	-16713954			540	15	36	152	12	0	0	-15270080		540	15	36	50	26	0	0	-16712150			540	15	36	127	108	0	0	-15548084			540	15	36	70	72	0	0	-16253985
	541	16	1	73	68	-1	-1	-16711927			541	16	1	64	159	-1	-1	-16711932		541	16	1	41	129	-1	-1	-16450793			541	16	1	141	187	-1	-1	-16711899			541	16	1	148	186	-1	-1	-16253149
	542	16	2	73	68	0	0	-16712442			542	16	2	66	153	3.63472	0.726944	-16711936		542	16	2	41	125	2.299	0.46	-16711918			542	16	2	145	183	3.25099	0.650199	-16581203			542	16	2	147	185	0.812749	0.16255	-16515293
	543	16	3	73	68	0	0	-16711936			543	16	3	70	149	3.25099	0.650199	-16253175		543	16	3	41	125	0	0	-16711925			543	16	3	145	183	0	0	-16318530			543	16	3	145	181	2.57014	0.514027	-15795668
	544	16	4	75	71	2.07211	0.414422	-16711936			544	16	4	70	139	5.747	1.1494	-16712703		544	16	4	41	125	0	0	-16449776			544	16	4	145	183	0	0	-16580660			544	16	4	145	181	0	0	-15536085
	545	16	5	75	71	0	0	-16712704			545	16	5	70	136	1.7241	0.34482	-16470776		545	16	5	41	125	0	0	-16451069			545	16	5	145	183	0	0	-16712497			545	16	5	145	181	0	0	-16590557
	546	16	6	75	71	0	0	-16711936			546	16	6	71	113	13.2306	2.64612	-16722432		546	16	6	41	125	0	0	-16319736			546	16	6	145	183	0	0	-16647714			546	16	6	153	184	4.91024	0.982048	-16720872
	547	16	7	75	71	0	0	-16711923			547	16	7	72	95	10.3606	2.07211	-15407081		547	16	7	41	125	0	0	-16319207			547	16	7	138	179	4.63338	0.926676	-16188589			547	16	7	153	184	0	0	-15600089
	548	16	8	75	71	0	0	-16711923			548	16	8	73	73	12.6565	2.53129	-16718336		548	16	8	41	125	0	0	-16515319			548	16	8	141	180	1.81736	0.363472	-16711778			548	16	8	153	184	0	0	-16517592
	549	16	9	75	71	0	0	-16711899			549	16	9	71	60	7.559	1.5118	-16711930		549	16	9	41	125	0	0	-16711903			549	16	9	141	180	0	0	-16712039			549	16	9	153	184	0	0	-16193515
	550	16	10	75	71	0	0	-16711910			550	16	10	69	55	3.09485	0.618971	-16515320		550	16	10	41	125	0	0	-16711923			550	16	10	141	180	0	0	-16712273			550	16	10	153	184	0	0	-16717810
	551	16	11	75	71	0	0	-16711928			551	16	11	68	50	2.93041	0.586081	-15861487		551	16	11	41	125	0	0	-16711916			551	16	11	141	180	0	0	-16515684			551	16	11	153	184	0	0	-15859926
	552	16	12	75	71	0	0	-16711921			552	16	12	67	43	4.06374	0.812749	-16711915		552	16	12	41	125	0	0	-16122096			552	16	12	141	180	0	0	-16712033			552	16	12	153	184	0	0	-15860438
	553	16	13	75	71	0	0	-16711910			553	16	13	67	43	0	0	-16253163		553	16	13	41	125	0	0	-15991004			553	16	13	141	180	0	0	-16711770			553	16	13	153	184	0	0	-16716782
	554	16	14	75	71	0	0	-16646385			554	16	14	67	43	0	0	-15794393		554	16	14	41	125	0	0	-16712933			554	16	14	141	180	0	0	-16384088			554	16	14	153	184	0	0	-16389078
	555	16	15	75	71	0	0	-16711929			555	16	15	67	43	0	0	-16258276		555	16	15	41	125	0	0	-16712941			555	16	15	141	180	0	0	-16056412			555	16	15	153	184	0	0	-16715731
	556	16	16	75	71	0	0	-16712164			556	16	16	67	43	0	0	-15338708		556	16	16	41	125	0	0	-16711911			556	16	16	141	180	0	0	-16648300			556	16	16	153	184	0	0	-15925964
	557	16	17	75	71	0	0	-16580840			557	16	17	67	46	1.7241	0.34482	-16713447		557	16	17	41	125	0	0	-16711898			557	16	17	141	180	0	0	-16713339			557	16	17	152	179	2.93041	0.586081	-16202982
	558	16	18	74	71	0.5747	0.11494	-16711912			558	16	18	67	46	0	0	-16189665		558	16	18	41	125	0	0	-16711913			558	16	18	141	180	0	0	-16712811			558	16	18	152	179	0	0	-16532194
	559	16	19	74	73	1.1494	0.22988	-16711923			559	16	19	67	46	0	0	-16714739		559	16	19	41	125	0	0	-16711907			559	16	19	141	180	0	0	-16188026			559	16	19	152	179	0	0	-16070875
	560	16	20	74	73	0	0	-16711908			560	16	20	67	46	0	0	-15930075		560	16	20	41	125	0	0	-16646379			560	16	20	141	180	0	0	-16388990			560	16	20	152	179	0	0	-15939038
	561	16	21	74	73	0	0	-16711913			561	16	21	67	51	2.8735	0.5747	-16716275		561	16	21	41	125	0	0	-16711899			561	16	21	141	180	0	0	-15599480			561	16	21	152	179	0	0	-15675860
	562	16	22	74	73	0	0	-16711916			562	16	22	67	51	0	0	-16187618		562	16	22	41	125	0	0	-16253146			562	16	22	141	180	0	0	-15927937			562	16	22	152	179	0	0	-15874517
	563	16	23	74	73	0	0	-16711898			563	16	23	67	51	0	0	-16715506		563	16	23	41	125	0	0	-16646362			563	16	23	141	180	0	0	-16128637			563	16	23	152	179	0	0	-15942100
	564	16	24	74	73	0	0	-16711900			564	16	24	67	51	0	0	-16189403		564	16	24	41	125	0	0	-16384215			564	16	24	136	175	4.06374	0.812749	-16731099			564	16	24	152	179	0	0	-16734189
	565	16	25	74	73	0	0	-16516062			565	16	25	67	51	0	0	-16712676		565	16	25	41	125	0	0	-16712158			565	16	25	136	175	0	0	-16735967			565	16	25	152	179	0	0	-16735204
	566	16	26	74	73	0	0	-15403973			566	16	26	67	51	0	0	-16715235		566	16	26	41	125	0	0	-16188125			566	16	26	136	175	0	0	-16731615			566	16	26	152	179	0	0	-16735203
	567	16	27	74	73	0	0	-15601102			567	16	27	67	51	0	0	-15139024		567	16	27	41	125	0	0	-16711897			567	16	27	138	177	1.6255	0.325099	-16385729			567	16	27	152	179	0	0	-16397250
	568	16	28	74	78	2.8735	0.5747	-16384215			568	16	28	67	51	0	0	-14418119		568	16	28	41	125	0	0	-16187847			568	16	28	138	177	0	0	-16058304			568	16	28	152	179	0	0	-15281592
	569	16	29	74	78	0	0	-16582551			569	16	29	67	51	0	0	-16319190		569	16	29	41	125	0	0	-15075269			569	16	29	134	176	2.36955	0.47391	-16714192			569	16	29	152	179	0	0	-16467658
	570	16	30	73	78	0.5747	0.11494	-16712662			570	16	30	67	51	0	0	-16320486		570	16	30	41	125	0	0	-16254929			570	16	30	123	172	6.72669	1.34534	-15934444			570	16	30	152	179	0	0	-16072128
	571	16	31	71	75	2.07211	0.414422	-16711886			571	16	31	67	51	0	0	-16714460		571	16	31	41	125	0	0	-16123859			571	16	31	123	171	0.5747	0.11494	-16256235			571	16	31	152	179	0	0	-15614651
	572	16	32	71	75	0	0	-16711896			572	16	32	69	51	1.1494	0.22988	-16719343		572	16	32	41	125	0	0	-15795145			572	16	32	123	171	0	0	-16384237			572	16	32	152	179	0	0	-16733896
	573	16	33	71	75	0	0	-16712403			573	16	33	69	51	0	0	-15860959		573	16	33	41	125	0	0	-16451271			573	16	33	123	171	0	0	-16713974			573	16	33	152	179	0	0	-16529088
	574	16	34	71	75	0	0	-16711892			574	16	34	69	51	0	0	-15466715		574	16	34	41	125	0	0	-15401411			574	16	34	123	171	0	0	-16713446			574	16	34	152	179	0	0	-16734417
	575	16	35	71	75	0	0	-16711887			575	16	35	69	51	0	0	-16721640		575	16	35	41	125	0	0	-16320724			575	16	35	123	171	0	0	-16711889			575	16	35	152	179	0	0	-16728782
	576	16	36	71	75	0	0	-16711878			576	16	36	69	51	0	0	-16713437		576	16	36	41	125	0	0	-16384446			576	16	36	123	171	0	0	-16646363			576	16	36	152	179	0	0	-16731872
	577	17	1	113	157	-1	-1	-16711924			577	17	1	79	55	-1	-1	-16189939		577	17	1	93	186	-1	-1	-16254195			577	17	1	75	156	-1	-1	-16253941			577	17	1	80	143	-1	-1	-16712603
	578	17	2	113	157	0	0	-16712439			578	17	2	77	54	1.28507	0.257014	-16515557		578	17	2	93	186	0	0	-16711929			578	17	2	73	152	2.57014	0.514027	-15997165			578	17	2	78	138	3.09485	0.618971	-16450229
	579	17	3	113	157	0	0	-16711931			579	17	3	77	55	0.5747	0.11494	-16515319		579	17	3	93	186	0	0	-16711925			579	17	3	66	145	5.68924	1.13785	-16140271			579	17	3	78	138	0	0	-16253339
	580	17	4	113	157	0	0	-14944988			580	17	4	77	55	0	0	-16714231		580	17	4	93	186	0	0	-16711920			580	17	4	66	140	2.8735	0.5747	-16264949			580	17	4	78	138	0	0	-16122756
	581	17	5	113	157	0	0	-15607783			581	17	5	77	55	0	0	-16711933		581	17	5	93	186	0	0	-16711916			581	17	5	62	137	2.8735	0.5747	-16397048			581	17	5	78	138	0	0	-15794561
	582	17	6	109	159	2.57014	0.514027	-16712434			582	17	6	77	55	0	0	-16713978		582	17	6	93	186	0	0	-16646632			582	17	6	62	134	1.7241	0.34482	-16395001			582	17	6	78	138	0	0	-16057731
	583	17	7	109	159	0	0	-16711917			583	17	7	77	55	0	0	-16711927		583	17	7	87	182	4.144	0.829	-16449764			583	17	7	61	133	0.812749	0.16255	-16342260			583	17	7	78	138	0	0	-15990911
	584	17	8	109	159	0	0	-16711927			584	17	8	77	55	0	0	-16711927		584	17	8	87	182	0	0	-16713963			584	17	8	61	132	0.5747	0.11494	-16737784			584	17	8	78	138	0	0	-15992190
	585	17	9	109	159	0	0	-16711905			585	17	9	77	55	0	0	-15335666		585	17	9	87	182	0	0	-16712164			585	17	9	60	132	0.5747	0.11494	-16406260			585	17	9	78	138	0	0	-16187510
	586	17	10	109	159	0	0	-16711907			586	17	10	77	55	0	0	-16711929		586	17	10	87	182	0	0	-16318689			586	17	10	60	132	0	0	-16543477			586	17	10	78	138	0	0	-15729266
	587	17	11	109	159	0	0	-15992545			587	17	11	81	56	2.36955	0.47391	-15927246		587	17	11	87	182	0	0	-16711912			587	17	11	60	132	0	0	-16282358			587	17	11	78	138	0	0	-15992174
	588	17	12	109	159	0	0	-15532238			588	17	12	81	55	0.5747	0.11494	-16711911		588	17	12	87	182	0	0	-16384219			588	17	12	57	129	2.43825	0.487649	-16282609			588	17	12	78	138	0	0	-16125806
	589	17	13	109	159	0	0	-16711903			589	17	13	81	55	0	0	-16253166		589	17	13	87	182	0	0	-16515302			589	17	13	57	129	0	0	-16748288			589	17	13	78	138	0	0	-16713331
	590	17	14	109	159	0	0	-16712163			590	17	14	81	55	0	0	-16515289		590	17	14	87	182	0	0	-16713961			590	17	14	57	129	0	0	-16747520			590	17	14	78	138	0	0	-15729769
	591	17	15	109	159	0	0	-16711894			591	17	15	81	55	0	0	-16711914		591	17	15	87	182	0	0	-16711932			591	17	15	57	129	0	0	-16749312			591	17	15	78	138	0	0	-16385128
	592	17	16	109	159	0	0	-16122068			592	17	16	81	55	0	0	-16580840		592	17	16	87	182	0	0	-16711915			592	17	16	57	129	0	0	-16744438			592	17	16	78	138	0	0	-16581988
	593	17	17	109	159	0	0	-16450518			593	17	17	81	55	0	0	-16711936		593	17	17	87	182	0	0	-16713208			593	17	17	56	128	0.812749	0.16255	-16348151			593	17	17	78	138	0	0	-16712302
	594	17	18	109	159	0	0	-16711893			594	17	18	81	55	0	0	-16123882		594	17	18	87	182	0	0	-16711924			594	17	18	56	128	0	0	-16675578			594	17	18	78	138	0	0	-16715620
	595	17	19	109	159	0	0	-16711884			595	17	19	84	56	1.81736	0.363472	-16711915		595	17	19	87	182	0	0	-16384240			595	17	19	56	128	0	0	-16745216			595	17	19	78	138	0	0	-16584549
	596	17	20	109	159	0	0	-16712650			596	17	20	87	58	2.07211	0.414422	-16711908		596	17	20	87	182	0	0	-16711930			596	17	20	56	128	0	0	-16744947			596	17	20	78	138	0	0	-16647783
	597	17	21	109	159	0	0	-16056510			597	17	21	87	58	0	0	-16711893		597	17	21	87	182	0	0	-16713727			597	17	21	51	126	3.09485	0.618971	-16003032			597	17	21	78	138	0	0	-16715359
	598	17	22	109	159	0	0	-16712128			598	17	22	87	58	0	0	-16253427		598	17	22	87	182	0	0	-16714229			598	17	22	51	126	0	0	-16261859			598	17	22	78	138	0	0	-16519500
	599	17	23	109	159	0	0	-16515268			599	17	23	89	60	1.6255	0.325099	-16711892		599	17	23	87	182	0	0	-16449776			599	17	23	51	126	0	0	-16199130			599	17	23	78	138	0	0	-16519500
	600	17	24	109	159	0	0	-16711876			600	17	24	89	60	0	0	-16711895		600	17	24	87	182	0	0	-16716782			600	17	24	51	126	0	0	-15866330			600	17	24	78	138	0	0	-16189508
	601	17	25	109	159	0	0	-16646323			601	17	25	90	60	0.5747	0.11494	-16711901		601	17	25	87	182	0	0	-16716523			601	17	25	51	126	0	0	-15798741			601	17	25	78	138	0	0	-16386887
	602	17	26	109	159	0	0	-16711872			602	17	26	90	60	0	0	-16712133		602	17	26	87	182	0	0	-16717563			602	17	26	51	126	0	0	-16125652			602	17	26	77	138	0.5747	0.11494	-15991376
	603	17	27	109	159	0	0	-16712889			603	17	27	90	60	0	0	-16711887		603	17	27	87	182	0	0	-16584682			603	17	27	51	126	0	0	-16472809			603	17	27	77	138	0	0	-16713328
	604	17	28	109	159	0	0	-16516024			604	17	28	90	60	0	0	-16711882		604	17	28	87	187	2.873	0.575	-16711920			604	17	28	51	126	0	0	-16731884			604	17	28	77	138	0	0	-16712026
	605	17	29	109	159	0	0	-16711866			605	17	29	90	60	0	0	-16711886		605	17	29	87	187	0	0	-16711913			605	17	29	51	126	0	0	-16730339			605	17	29	77	138	0	0	-16711761
	606	17	30	109	159	0	0	-16711867			606	17	30	90	59	0.5747	0.11494	-16580800		606	17	30	87	187	0	0	-16711914			606	17	30	51	126	0	0	-16731883			606	17	30	77	138	0	0	-16711762
	607	17	31	109	159	0	0	-16711860			607	17	31	90	59	0	0	-16319674		607	17	31	87	185	1.149	0.23	-16711914			607	17	31	51	126	0	0	-16081891			607	17	31	77	138	0	0	-15733559
	608	17	32	109	159	0	0	-16713394			608	17	32	90	59	0	0	-16714218		608	17	32	87	185	0	0	-16711936			608	17	32	45	121	4.48855	0.89771	-16748773			608	17	32	77	138	0	0	-16384062
	609	17	33	112	160	1.81736	0.363472	-16713166			609	17	33	90	59	0	0	-16056518		609	17	33	87	185	0	0	-16712934			609	17	33	41	120	2.36955	0.47391	-16740315			609	17	33	74	140	2.07211	0.414422	-16449894
	610	17	34	112	160	0	0	-16711881			610	17	34	90	59	0	0	-15795912		610	17	34	87	185	0	0	-16711919			610	17	34	41	118	1.1494	0.22988	-16754938			610	17	34	74	140	0	0	-16711790
	611	17	35	112	160	0	0	-16711870			611	17	35	90	59	0	0	-15990986		611	17	35	87	185	0	0	-16711931			611	17	35	35	108	6.7021	1.34042	-15670204			611	17	35	74	140	0	0	-16711788
	612	17	36	112	160	0	0	-16711873			612	17	36	90	59	0	0	-16711868		612	17	36	87	185	0	0	-16711926			612	17	36	37	105	2.07211	0.414422	-15873737			612	17	36	74	140	0	0	-16711783
	613	18	1	91	77	-1	-1	-16711929			613	18	1	39	65	-1	-1	-16713191		613	18	1	121	124	-1	-1	-16711891			613	18	1	69	40	-1	-1	-16188148			613	18	1	133	64	-1	-1	-16745465
	614	18	2	94	76	1.81736	0.363472	-16384241			614	18	2	39	65	0	0	-16187643		614	18	2	121	124	0	0	-16711901			614	18	2	64	41	2.93041	0.586081	-16711936			614	18	2	134	66	1.28507	0.257014	-16603617
	615	18	3	94	76	0	0	-16515321			615	18	3	39	65	0	0	-16711926		615	18	3	121	124	0	0	-16711912			615	18	3	63	41	0.5747	0.11494	-16711936			615	18	3	134	66	0	0	-16732137
	616	18	4	94	76	0	0	-16711932			616	18	4	38	62	1.817	0.363	-16711919		616	18	4	121	124	0	0	-16319461			616	18	4	58	40	2.93041	0.586081	-16253676			616	18	4	134	66	0	0	-16604393
	617	18	5	94	76	0	0	-16580852			617	18	5	38	62	0	0	-16187638		617	18	5	121	124	0	0	-16713958			617	18	5	58	40	0	0	-15085025			617	18	5	134	66	0	0	-16729828
	618	18	6	94	76	0	0	-16714746			618	18	6	38	62	0	0	-16516586		618	18	6	121	124	0	0	-16713440			618	18	6	53	43	3.35105	0.67021	-16609785			618	18	6	130	68	2.57014	0.514027	-16072923
	619	18	7	94	76	0	0	-15339235			619	18	7	38	62	0	0	-16450291		619	18	7	121	124	0	0	-16384228			619	18	7	53	43	0	0	-16538616			619	18	7	130	68	0	0	-16535769
	620	18	8	94	76	0	0	-15471842			620	18	8	38	62	0	0	-16711910		620	18	8	121	124	0	0	-16056528			620	18	8	53	43	0	0	-16736505			620	18	8	130	68	0	0	-16401113
	621	18	9	94	76	0	0	-16190444			621	18	9	38	62	0	0	-16711926		621	18	9	121	124	0	0	-16647638			621	18	9	54	49	3.49576	0.699153	-16668907			621	18	9	130	68	0	0	-15352532
	622	18	10	94	76	0	0	-16581099			622	18	10	38	62	0	0	-16711919		622	18	10	121	124	0	0	-16253642			622	18	10	57	50	1.81736	0.363472	-16737263			622	18	10	130	68	0	0	-15682254
	623	18	11	94	76	0	0	-16711919			623	18	11	38	62	0	0	-16711909		623	18	11	121	124	0	0	-16253389			623	18	11	58	51	0.812749	0.16255	-15951591			623	18	11	130	68	0	0	-16732131
	624	18	12	94	75	0.5747	0.11494	-16711918			624	18	12	38	62	0	0	-16580831		624	18	12	121	124	0	0	-16711902			624	18	12	58	51	0	0	-16342512			624	18	12	130	68	0	0	-15354066
	625	18	13	94	75	0	0	-15925481			625	18	13	38	62	0	0	-16515300		625	18	13	121	124	0	0	-16581073			625	18	13	58	51	0	0	-16468456			625	18	13	130	68	0	0	-16737002
	626	18	14	94	75	0	0	-16713196			626	18	14	43	64	3.095	0.619	-15335870		626	18	14	121	124	0	0	-16711896			626	18	14	58	51	0	0	-16200418			626	18	14	130	68	0	0	-16738017
	627	18	15	93	75	0.5747	0.11494	-15467998			627	18	15	43	64	0	0	-15205080		627	18	15	124	118	3.855	0.771	-16320197			627	18	15	58	51	0	0	-16201440			627	18	15	134	76	5.14027	1.02805	-15885282
	628	18	16	93	74	0.5747	0.11494	-16714223			628	18	16	43	64	0	0	-16717306		628	18	16	124	118	0	0	-16712913			628	18	16	62	55	3.25099	0.650199	-16605684			628	18	16	134	76	0	0	-16149475
	629	18	17	94	73	0.812749	0.16255	-16714983			629	18	17	43	64	0	0	-16257502		629	18	17	124	118	0	0	-16711886			629	18	17	67	56	2.93041	0.586081	-16474600			629	18	17	134	76	0	0	-16540130
	630	18	18	94	73	0	0	-16715247			630	18	18	43	64	0	0	-15925473		630	18	18	124	118	0	0	-16253129			630	18	18	70	61	3.35105	0.67021	-16019942			630	18	18	134	76	0	0	-16144344
	631	18	19	94	73	0	0	-16711907			631	18	19	43	64	0	0	-16719352		631	18	19	124	118	0	0	-16711884			631	18	19	82	66	7.4711	1.49422	-16413926			631	18	19	134	76	0	0	-16735970
	632	18	20	94	73	0	0	-16714466			632	18	20	45	66	1.625	0.325	-16722660		632	18	20	124	118	0	0	-16711886			632	18	20	91	70	5.66014	1.13203	-16748789			632	18	20	134	76	0	0	-16739557
	633	18	21	94	73	0	0	-16458727			633	18	21	48	69	2.438	0.488	-16739054		633	18	21	124	118	0	0	-16711905			633	18	21	92	72	1.28507	0.257014	-16751609			633	18	21	134	76	0	0	-16738009
	634	18	22	94	73	0	0	-16515294			634	18	22	52	73	3.251	0.65	-16737519		634	18	22	124	118	0	0	-16711899			634	18	22	87	70	3.09485	0.618971	-16741099			634	18	22	142	75	4.63338	0.926676	-15618266
	635	18	23	94	73	0	0	-16711918			635	18	23	52	73	0	0	-15739331		635	18	23	124	118	0	0	-16711897			635	18	23	87	70	0	0	-16675047			635	18	23	142	75	0	0	-16733668
	636	18	24	94	73	0	0	-16715238			636	18	24	52	73	0	0	-16737772		636	18	24	124	118	0	0	-16711900			636	18	24	87	70	0	0	-16547052			636	18	24	142	75	0	0	-16739051
	637	18	25	94	73	0	0	-15609313			637	18	25	52	73	0	0	-16731100		637	18	25	124	118	0	0	-16711900			637	18	25	87	70	0	0	-16349922			637	18	25	142	75	0	0	-16734939
	638	18	26	94	73	0	0	-16746999			638	18	26	54	78	3.095	0.619	-16737529		638	18	26	124	118	0	0	-16711901			638	18	26	87	70	0	0	-16750066			638	18	26	142	75	0	0	-16740062
	639	18	27	87	77	4.63338	0.926676	-16724456			639	18	27	54	78	0	0	-16729816		639	18	27	129	117	2.93	0.586	-16580820			639	18	27	91	73	2.8735	0.5747	-16474588			639	18	27	144	76	1.28507	0.257014	-16736733
	640	18	28	87	81	2.2988	0.45976	-16725982			640	18	28	54	78	0	0	-16737257		640	18	28	129	117	0	0	-16123872			640	18	28	91	73	0	0	-16608736			640	18	28	144	76	0	0	-16734684
	641	18	29	87	81	0	0	-16554736			641	18	29	59	78	2.873	0.575	-16719849		641	18	29	129	117	0	0	-16581576			641	18	29	91	73	0	0	-16607706			641	18	29	144	76	0	0	-15680721
	642	18	30	87	81	0	0	-16072910			642	18	30	57	78	1.149	0.23	-16722890		642	18	30	129	117	0	0	-16646858			642	18	30	91	73	0	0	-16547803			642	18	30	144	76	0	0	-16739808
	643	18	31	82	81	2.8735	0.5747	-16735961			643	18	31	57	78	0	0	-16323257		643	18	31	129	117	0	0	-16384985			643	18	31	92	78	2.93041	0.586081	-16409298			643	18	31	144	76	0	0	-16407507
	644	18	32	82	81	0	0	-16071897			644	18	32	57	78	0	0	-16392902		644	18	32	129	117	0	0	-16188886			644	18	32	92	78	0	0	-16739289			644	18	32	144	76	0	0	-16735446
	645	18	33	82	81	0	0	-15029460			645	18	33	57	78	0	0	-16735962		645	18	33	129	117	0	0	-16516309			645	18	33	92	78	0	0	-16606150			645	18	33	144	76	0	0	-16725188
	646	18	34	82	81	0	0	-16408286			646	18	34	60	78	1.724	0.345	-15801836		646	18	34	129	117	0	0	-16711883			646	18	34	92	78	0	0	-16474827			646	18	34	144	76	0	0	-16729811
	647	18	35	82	81	0	0	-16007893			647	18	35	60	78	0	0	-16728552		647	18	35	129	117	0	0	-16253899			647	18	35	92	78	0	0	-16745924			647	18	35	144	76	0	0	-15353791
	648	18	36	78	94	7.81677	1.56335	-16749552			648	18	36	60	78	0	0	-16131795		648	18	36	129	117	0	0	-16711891			648	18	36	91	82	2.36955	0.47391	-16745421			648	18	36	144	76	0	0	-16734943
	649	19	1	65	75	-1	-1	-16711931			649	19	1	87	68	-1	-1	-16189161		649	19	1	107	71	-1	-1	-15544029			649	19	1	68	83	-1	-1	-16711934			649	19	1	172	43	-1	-1	-16711876
	650	19	2	67	72	2.07211	0.414422	-16711936			650	19	2	86	65	1.817	0.363	-16711915		650	19	2	107	71	0	0	-15209943			650	19	2	68	81	1.1494	0.22988	-16713215			650	19	2	175	40	2.43825	0.487649	-16726465
	651	19	3	67	72	0	0	-16711927			651	19	3	84	62	2.072	0.414	-16711925		651	19	3	106	65	3.496	0.699	-16712443			651	19	3	67	75	3.49576	0.699153	-16392184			651	19	3	175	40	0	0	-16724411
	652	19	4	67	72	0	0	-16319736			652	19	4	84	62	0	0	-16711930		652	19	4	106	65	0	0	-16321001			652	19	4	65	76	1.28507	0.257014	-15928308			652	19	4	169	41	3.49576	0.699153	-16712139
	653	19	5	71	77	3.67988	0.735975	-16122357			653	19	5	84	65	1.724	0.345	-16122071		653	19	5	106	65	0	0	-16711916			653	19	5	64	76	0.5747	0.11494	-15728880			653	19	5	169	41	0	0	-16711885
	654	19	6	71	77	0	0	-15927003			654	19	6	84	65	0	0	-16648157		654	19	6	106	65	0	0	-16320000			654	19	6	63	76	0.5747	0.11494	-16712184			654	19	6	169	41	0	0	-16711894
	655	19	7	68	74	2.43825	0.487649	-16711925			655	19	7	84	64	0.575	0.115	-16254428		655	19	7	106	65	0	0	-16711930			655	19	7	63	76	0	0	-16720384			655	19	7	169	41	0	0	-16711891
	656	19	8	68	75	0.5747	0.11494	-16711927			656	19	8	84	64	0	0	-16123628		656	19	8	106	65	0	0	-16712182			656	19	8	63	76	0	0	-16647933			656	19	8	169	41	0	0	-16711888
	657	19	9	68	75	0	0	-16711922			657	19	9	84	64	0	0	-15401166		657	19	9	106	65	0	0	-16714239			657	19	9	63	76	0	0	-16711931			657	19	9	169	41	0	0	-16711888
	658	19	10	68	75	0	0	-16711911			658	19	10	84	64	0	0	-15532257		658	19	10	106	65	0	0	-16711910			658	19	10	63	76	0	0	-16580861			658	19	10	169	41	0	0	-16711896
	659	19	11	68	75	0	0	-15925989			659	19	11	84	64	0	0	-16451047		659	19	11	106	65	0	0	-16711926			659	19	11	63	76	0	0	-16711936			659	19	11	169	41	0	0	-16711894
	660	19	12	71	78	2.43825	0.487649	-16712423			660	19	12	84	64	0	0	-16713952		660	19	12	106	65	0	0	-16711921			660	19	12	63	76	0	0	-16711933			660	19	12	169	41	0	0	-16711897
	661	19	13	71	78	0	0	-16319970			661	19	13	84	64	0	0	-16711920		661	19	13	106	65	0	0	-16713206			661	19	13	63	76	0	0	-16712701			661	19	13	169	41	0	0	-16711884
	662	19	14	71	76	1.1494	0.22988	-16711911			662	19	14	87	63	1.817	0.363	-15204574		662	19	14	106	65	0	0	-16711924			662	19	14	63	76	0	0	-16711931			662	19	14	169	41	0	0	-16711882
	663	19	15	71	76	0	0	-16711914			663	19	15	87	63	0	0	-16318678		663	19	15	106	65	0	0	-16580837			663	19	15	63	76	0	0	-16386804			663	19	15	169	41	0	0	-16711885
	664	19	16	71	76	0	0	-16711906			664	19	16	87	63	0	0	-16646363		664	19	16	106	65	0	0	-16449767			664	19	16	63	76	0	0	-15665898			664	19	16	169	41	0	0	-16711887
	665	19	17	71	76	0	0	-16711907			665	19	17	87	63	0	0	-16711919		665	19	17	106	65	0	0	-16711929			665	19	17	60	86	6.00004	1.20001	-16711936			665	19	17	169	41	0	0	-16711872
	666	19	18	71	76	0	0	-16712424			666	19	18	87	63	0	0	-16711896		666	19	18	106	65	0	0	-16711921			666	19	18	60	85	0.5747	0.11494	-16450026			666	19	18	170	45	2.36955	0.47391	-16515272
	667	19	19	72	76	0.5747	0.11494	-16711917			667	19	19	90	63	1.724	0.345	-16713178		667	19	19	106	65	0	0	-16711909			667	19	19	60	85	0	0	-16515311			667	19	19	170	45	0	0	-16713177
	668	19	20	72	76	0	0	-16711921			668	19	20	90	63	0	0	-16515292		668	19	20	103	60	3.351	0.67	-16711922			668	19	20	60	85	0	0	-16449783			668	19	20	170	45	0	0	-16515272
	669	19	21	72	76	0	0	-16449767			669	19	21	90	63	0	0	-16711901		669	19	21	103	60	0	0	-16711919			669	19	21	60	85	0	0	-16711936			669	19	21	170	45	0	0	-16714198
	670	19	22	72	76	0	0	-16384235			670	19	22	90	63	0	0	-16711896		670	19	22	103	60	0	0	-16711934			670	19	22	60	85	0	0	-16515583			670	19	22	170	45	0	0	-16711882
	671	19	23	72	76	0	0	-16253927			671	19	23	90	63	0	0	-16711901		671	19	23	103	60	0	0	-16711930			671	19	23	60	85	0	0	-16712695			671	19	23	170	45	0	0	-16582848
	672	19	24	76	77	2.36955	0.47391	-16516563			672	19	24	89	63	0.575	0.115	-16711885		672	19	24	103	60	0	0	-16711920			672	19	24	60	85	0	0	-15536614			672	19	24	175	43	3.09485	0.618971	-16735969
	673	19	25	76	77	0	0	-15796189			673	19	25	89	63	0	0	-16711910		673	19	25	103	60	0	0	-16711932			673	19	25	60	92	4.0229	0.80458	-16061426			673	19	25	175	43	0	0	-15683532
	674	19	26	76	77	0	0	-16056523			674	19	26	89	63	0	0	-16711910		674	19	26	103	60	0	0	-16711927			674	19	26	59	99	4.06374	0.812749	-16461047			674	19	26	175	43	0	0	-16268996
	675	19	27	76	77	0	0	-15925702			675	19	27	89	63	0	0	-15794385		675	19	27	103	60	0	0	-16712182			675	19	27	59	101	1.1494	0.22988	-15925750			675	19	27	175	43	0	0	-15745473
	676	19	28	76	77	0	0	-16449764			676	19	28	89	63	0	0	-16079589		676	19	28	103	60	0	0	-16713720			676	19	28	59	101	0	0	-16516072			676	19	28	178	46	2.43825	0.487649	-16718547
	677	19	29	76	77	0	0	-15795417			677	19	29	74	63	8.62	1.724	-16318689		677	19	29	103	60	0	0	-16711928			677	19	29	59	101	0	0	-16713721			677	19	29	178	46	0	0	-16583618
	678	19	30	75	80	1.81736	0.363472	-16711907			678	19	30	71	70	4.377	0.875	-16741376		678	19	30	103	60	0	0	-16712953			678	19	30	59	101	0	0	-15859932			678	19	30	186	49	4.91024	0.982048	-16723692
	679	19	31	75	80	0	0	-16711898			679	19	31	70	72	1.285	0.257	-16482300		679	19	31	103	60	0	0	-16712441			679	19	31	59	101	0	0	-15338967			679	19	31	186	49	0	0	-16726496
	680	19	32	75	80	0	0	-16711887			680	19	32	70	77	2.873	0.575	-16079605		680	19	32	103	60	0	0	-16713708			680	19	32	59	101	0	0	-16057065			680	19	32	186	49	0	0	-16732912
	681	19	33	75	80	0	0	-16711893			681	19	33	70	74	1.724	0.345	-16748544		681	19	33	103	60	0	0	-16712949			681	19	33	59	101	0	0	-15861479			681	19	33	186	49	0	0	-16728817
	682	19	34	75	80	0	0	-16711888			682	19	34	68	72	1.625	0.325	-15623909		682	19	34	103	60	0	0	-16712952			682	19	34	62	98	2.43825	0.487649	-16581576			682	19	34	186	49	0	0	-16736510
	683	19	35	75	80	0	0	-16711884			683	19	35	68	78	3.448	0.69	-16327678		683	19	35	103	60	0	0	-16712439			683	19	35	62	95	1.7241	0.34482	-15794353			683	19	35	186	49	0	0	-16728300
	684	19	36	75	80	0	0	-16711899			684	19	36	68	78	0	0	-16727296		684	19	36	103	60	0	0	-16711920			684	19	36	66	93	2.57014	0.514027	-15990954			684	19	36	186	49	0	0	-16727777
	685	20	1	129	93	-1	-1	-16581851			685	20	1	62	63	-1	-1	-16385778		685	20	1	80	65	-1	-1	-16711933			685	20	1	55	24	-1	-1	-16718543			685	20	1	269	83	-1	-1	-16711895
	686	20	2	131	87	3.63472	0.726944	-16713692			686	20	2	59	57	3.855	0.771	-16711924		686	20	2	80	65	0	0	-15861234			686	20	2	50	26	3.09485	0.618971	-16712134			686	20	2	269	83	0	0	-16384213
	687	20	3	131	87	0	0	-16711892			687	20	3	59	59	1.149	0.23	-16320223		687	20	3	80	65	0	0	-16711936			687	20	3	52	24	1.6255	0.325099	-16712911			687	20	3	269	83	0	0	-16122580
	688	20	4	131	87	0	0	-16580811			688	20	4	59	59	0	0	-16057817		688	20	4	75	63	3.095	0.619	-16581111			688	20	4	52	24	0	0	-16580790			688	20	4	269	83	0	0	-15927759
	689	20	5	131	87	0	0	-16711876			689	20	5	59	59	0	0	-16449764		689	20	5	75	63	0	0	-16384761			689	20	5	52	24	0	0	-16711863			689	20	5	269	83	0	0	-16057799
	690	20	6	131	87	0	0	-16450718			690	20	6	59	59	0	0	-16711913		690	20	6	75	63	0	0	-16711926			690	20	6	52	24	0	0	-16712383			690	20	6	269	83	0	0	-16388811
	691	20	7	131	87	0	0	-16711841			691	20	7	59	59	0	0	-16515304		691	20	7	75	63	0	0	-16711934			691	20	7	52	24	0	0	-16581291			691	20	7	269	83	0	0	-15927244
	692	20	8	131	87	0	0	-16711821			692	20	8	57	61	1.625	0.325	-16319457		692	20	8	75	63	0	0	-16580851			692	20	8	52	24	0	0	-16580764			692	20	8	269	83	0	0	-15729604
	693	20	9	131	87	0	0	-16318629			693	20	9	57	61	0	0	-16516058		693	20	9	75	63	0	0	-16583167			693	20	9	52	24	0	0	-16711830			693	20	9	269	83	0	0	-15927237
	694	20	10	131	87	0	0	-16515218			694	20	10	57	61	0	0	-16581087		694	20	10	75	63	0	0	-16713983			694	20	10	52	24	0	0	-16711836			694	20	10	269	83	0	0	-15991497
	695	20	11	131	87	0	0	-16713133			695	20	11	57	61	0	0	-16581087		695	20	11	75	63	0	0	-15796197			695	20	11	52	24	0	0	-16711824			695	20	11	269	83	0	0	-16711888
	696	20	12	131	87	0	0	-16646834			696	20	12	57	61	0	0	-16711904		696	20	12	69	75	7.71	1.542	-16715507			696	20	12	52	24	0	0	-16713363			696	20	12	269	83	0	0	-16122055
	697	20	13	131	87	0	0	-16515234			697	20	13	57	61	0	0	-16646368		697	20	13	69	75	0	0	-16718578			697	20	13	54	28	2.57014	0.514027	-16712891			697	20	13	269	83	0	0	-16712397
	698	20	14	131	87	0	0	-16319900			698	20	14	57	61	0	0	-16581099		698	20	14	69	75	0	0	-16649438			698	20	14	54	28	0	0	-16711864			698	20	14	269	83	0	0	-16713164
	699	20	15	133	88	1.28507	0.257014	-16713102			699	20	15	58	63	1.285	0.257	-16581600		699	20	15	69	75	0	0	-15799521			699	20	15	54	28	0	0	-16711852			699	20	15	269	83	0	0	-16581063
	700	20	16	133	88	0	0	-16711846			700	20	16	58	63	0	0	-16384482		700	20	16	69	75	0	0	-16456935			700	20	16	54	28	0	0	-16711855			700	20	16	269	83	0	0	-16717524
	701	20	17	133	88	0	0	-16711851			701	20	17	58	63	0	0	-16450275		701	20	17	69	75	0	0	-15931356			701	20	17	54	28	0	0	-16711841			701	20	17	269	83	0	0	-16058820
	702	20	18	133	88	0	0	-16714420			702	20	18	58	63	0	0	-16385504		702	20	18	69	75	0	0	-16649702			702	20	18	58	28	2.2988	0.45976	-16724153			702	20	18	269	83	0	0	-15798982
	703	20	19	138	89	2.93041	0.586081	-16711811			703	20	19	58	63	0	0	-16515308		703	20	19	72	73	2.072	0.414	-16711895			703	20	19	63	27	2.93041	0.586081	-15548347			703	20	19	269	80	1.7241	0.34482	-16711888
	704	20	20	138	89	0	0	-16711801			704	20	20	58	63	0	0	-16580839		704	20	20	72	73	0	0	-16711881			704	20	20	63	27	0	0	-16200374			704	20	20	269	80	0	0	-16711882
	705	20	21	138	89	0	0	-16711800			705	20	21	58	63	0	0	-16188148		705	20	21	72	73	0	0	-16122297			705	20	21	63	27	0	0	-15281844			705	20	21	269	80	0	0	-16712134
	706	20	22	138	89	0	0	-16711803			706	20	22	58	63	0	0	-16646643		706	20	22	72	73	0	0	-16711875			706	20	22	63	27	0	0	-16202930			706	20	22	269	80	0	0	-16711880
	707	20	23	138	89	0	0	-16712070			707	20	23	58	63	0	0	-16711916		707	20	23	72	73	0	0	-16718271			707	20	23	63	27	0	0	-16462264			707	20	23	269	80	0	0	-16123843
	708	20	24	138	89	0	0	-16711828			708	20	24	58	59	2.299	0.46	-16712443		708	20	24	72	73	0	0	-16714156			708	20	24	63	27	0	0	-15010216			708	20	24	269	80	0	0	-16711864
	709	20	25	138	89	0	0	-15728797			709	20	25	58	59	0	0	-16580854		709	20	25	72	73	0	0	-16714915			709	20	25	63	27	0	0	-15402157			709	20	25	269	80	0	0	-16712138
	710	20	26	138	89	0	0	-15930041			710	20	26	58	59	0	0	-16516335		710	20	26	72	73	0	0	-16713111			710	20	26	63	27	0	0	-15204506			710	20	26	269	80	0	0	-16711887
	711	20	27	142	89	2.2988	0.45976	-16711817			711	20	27	58	59	0	0	-16516599		711	20	27	72	73	0	0	-16725928			711	20	27	63	27	0	0	-16711851			711	20	27	269	80	0	0	-16711884
	712	20	28	142	89	0	0	-16711836			712	20	28	58	59	0	0	-16385531		712	20	28	72	73	0	0	-16258457			712	20	28	63	27	0	0	-16712617			712	20	28	269	80	0	0	-16580818
	713	20	29	142	89	0	0	-16450171			713	20	29	58	59	0	0	-16712181		713	20	29	72	73	0	0	-16725407			713	20	29	63	27	0	0	-16384164			713	20	29	269	80	0	0	-16712640
	714	20	30	142	89	0	0	-16711828			714	20	30	58	59	0	0	-16254715		714	20	30	72	73	0	0	-16716967			714	20	30	63	27	0	0	-16580777			714	20	30	269	80	0	0	-15729855
	715	20	31	142	89	0	0	-16712347			715	20	31	58	59	0	0	-16711923		715	20	31	72	73	0	0	-16722859			715	20	31	63	27	0	0	-15925420			715	20	31	269	80	0	0	-16520638
	716	20	32	142	89	0	0	-16712085			716	20	32	58	59	0	0	-16712434		716	20	32	73	78	2.93	0.586	-15925461			716	20	32	71	26	4.63338	0.926676	-16650941			716	20	32	268	80	0.5747	0.11494	-16122030
	717	20	33	142	89	0	0	-16712089			717	20	33	58	59	0	0	-16582131		717	20	33	73	78	0	0	-16711891			717	20	33	71	26	0	0	-16449717			717	20	33	268	80	0	0	-14620840
	718	20	34	142	89	0	0	-16451745			718	20	34	57	63	2.37	0.474	-16712184		718	20	34	73	78	0	0	-15532225			718	20	34	71	26	0	0	-16253081			718	20	34	254	83	8.22845	1.64569	-16731624
	719	20	35	134	90	4.63338	0.926676	-16711840			719	20	35	57	63	0	0	-16711929		719	20	35	73	78	0	0	-16580807			719	20	35	71	26	0	0	-16647582			719	20	35	254	83	0	0	-16406501
	720	20	36	134	90	0	0	-16711830			720	20	36	57	63	0	0	-16646650		720	20	36	73	78	0	0	-16723181			720	20	36	71	26	0	0	-16187546			720	20	36	254	83	0	0	-16725708
	721	21	1	70	91	-1	-1	-16450024			721	21	1	197	117	-1	-1	-16711936		721	21	1	37	69	-1	-1	-16711934			721	21	1	85	74	-1	-1	-16712191			721	21	1	56	62	-1	-1	-16711921
	722	21	2	72	84	4.18388	0.836776	-16711916			722	21	2	189	115	4.739	0.948	-16582656		722	21	2	37	69	0	0	-16056562			722	21	2	88	72	2.07211	0.414422	-16449789			722	21	2	58	65	2.07211	0.414422	-16452333
	723	21	3	73	83	0.812749	0.16255	-16711922			723	21	3	188	113	1.285	0.257	-15600123		723	21	3	39	63	3.635	0.727	-16712192			723	21	3	88	72	0	0	-16711915			723	21	3	58	62	1.7241	0.34482	-16646378
	724	21	4	73	83	0	0	-16711921			724	21	4	188	113	0	0	-16253184		724	21	4	40	60	1.817	0.363	-16253177			724	21	4	95	71	4.06374	0.812749	-16649703			724	21	4	58	62	0	0	-16515296
	725	21	5	73	83	0	0	-16188384			725	21	5	188	113	0	0	-16713981		725	21	5	42	57	2.072	0.414	-16712445			725	21	5	95	71	0	0	-16716784			725	21	5	58	62	0	0	-15538389
	726	21	6	73	82	0.5747	0.11494	-14622661			726	21	6	182	113	3.448	0.69	-15991808		726	21	6	42	57	0	0	-16712448			726	21	6	95	71	0	0	-16653038			726	21	6	62	64	2.57014	0.514027	-16711915
	727	21	7	80	82	4.0229	0.80458	-16647143			727	21	7	180	114	1.285	0.257	-16319988		727	21	7	42	55	1.149	0.23	-16711936			727	21	7	95	71	0	0	-16717546			727	21	7	62	64	0	0	-16711913
	728	21	8	80	82	0	0	-16711898			728	21	8	179	118	2.37	0.474	-16646400		728	21	8	42	55	0	0	-16711936			728	21	8	95	71	0	0	-16718584			728	21	8	62	64	0	0	-16712174
	729	21	9	80	82	0	0	-16449756			729	21	9	178	117	0.813	0.163	-16711936		729	21	9	42	55	0	0	-16711936			729	21	9	95	71	0	0	-16589805			729	21	9	64	67	2.07211	0.414422	-16451296
	730	21	10	80	82	0	0	-16712657			730	21	10	178	117	0	0	-16711933		730	21	10	39	55	1.724	0.345	-16711934			730	21	10	95	71	0	0	-16656368			730	21	10	64	67	0	0	-15927771
	731	21	11	84	81	2.36955	0.47391	-16647153			731	21	11	178	117	0	0	-16711936		731	21	11	39	55	0	0	-16711936			731	21	11	95	71	0	0	-16459491			731	21	11	64	67	0	0	-15730646
	732	21	12	84	81	0	0	-16712418			732	21	12	178	117	0	0	-16711936		732	21	12	39	55	0	0	-16253174			732	21	12	95	71	0	0	-16722661			732	21	12	64	67	0	0	-15533777
	733	21	13	84	81	0	0	-16711922			733	21	13	178	117	0	0	-16711936		733	21	13	42	55	1.724	0.345	-16253417			733	21	13	95	71	0	0	-16594652			733	21	13	64	67	0	0	-16450255
	734	21	14	85	81	0.5747	0.11494	-16711928			734	21	14	178	117	0	0	-16711934		734	21	14	42	55	0	0	-16711929			734	21	14	96	73	1.28507	0.257014	-16721642			734	21	14	66	75	4.7391	0.94782	-16003810
	735	21	15	85	81	0	0	-16581099			735	21	15	177	113	2.37	0.474	-16711936		735	21	15	42	55	0	0	-16711935			735	21	15	96	73	0	0	-16730109			735	21	15	66	75	0	0	-16199906
	736	21	16	85	81	0	0	-15795419			736	21	16	177	113	0	0	-16711936		736	21	16	42	55	0	0	-16711928			736	21	16	96	73	0	0	-16604913			736	21	16	64	78	2.07211	0.414422	-15745792
	737	21	17	80	82	2.93041	0.586081	-16254428			737	21	17	177	113	0	0	-16711936		737	21	17	42	55	0	0	-16711930			737	21	17	102	75	3.63472	0.726944	-16201951			737	21	17	63	82	2.36955	0.47391	-16129254
	738	21	18	80	82	0	0	-16646381			738	21	18	175	112	1.285	0.257	-16711936		738	21	18	42	55	0	0	-16580842			738	21	18	102	75	0	0	-16665835			738	21	18	63	82	0	0	-15868399
	739	21	19	80	82	0	0	-16384229			739	21	19	175	112	0	0	-16711934		739	21	19	42	55	0	0	-16711931			739	21	19	102	75	0	0	-16533987			739	21	19	63	82	0	0	-16389623
	740	21	20	80	82	0	0	-16385501			740	21	20	175	112	0	0	-16711936		740	21	20	42	55	0	0	-16384242			740	21	20	105	75	1.7241	0.34482	-16457690			740	21	20	63	82	0	0	-16057063
	741	21	21	80	80	1.1494	0.22988	-16711910			741	21	21	175	112	0	0	-16713472		741	21	21	42	55	0	0	-16711933			741	21	21	115	75	5.747	1.1494	-16733929			741	21	21	63	82	0	0	-15861475
	742	21	22	80	79	0.5747	0.11494	-16711915			742	21	22	175	112	0	0	-16711934		742	21	22	42	55	0	0	-14814682			742	21	22	115	75	0	0	-16400610			742	21	22	63	82	0	0	-15993826
	743	21	23	80	79	0	0	-16711902			743	21	23	175	112	0	0	-16711935		743	21	23	63	64	13.13	2.626	-16255216			743	21	23	115	75	0	0	-16398817			743	21	23	63	82	0	0	-15533801
	744	21	24	80	79	0	0	-16713195			744	21	24	175	112	0	0	-16580858		744	21	24	63	78	8.046	1.609	-16188900			744	21	24	115	75	0	0	-16652510			744	21	24	63	82	0	0	-15991525
	745	21	25	80	79	0	0	-16189926			745	21	25	175	112	0	0	-16711931		745	21	25	57	81	3.855	0.771	-16725240			745	21	25	115	75	0	0	-16718552			745	21	25	63	82	0	0	-15534304
	746	21	26	80	79	0	0	-16711898			746	21	26	175	112	0	0	-16123130		746	21	26	58	83	1.285	0.257	-16716774			746	21	26	116	76	0.812749	0.16255	-16711896			746	21	26	63	82	0	0	-16593136
	747	21	27	85	81	3.09485	0.618971	-16711902			747	21	27	175	112	0	0	-15928551		747	21	27	67	87	5.66	1.132	-16724480			747	21	27	116	76	0	0	-16384185			747	21	27	63	82	0	0	-16526832
	748	21	28	85	81	0	0	-16711913			748	21	28	172	114	2.072	0.414	-16711936		748	21	28	58	87	5.172	1.034	-16599016			748	21	28	118	80	2.57014	0.514027	-16711899			748	21	28	63	82	0	0	-15473125
	749	21	29	85	82	0.5747	0.11494	-16711903			749	21	29	172	114	0	0	-16712444		749	21	29	58	87	0	0	-15945954			749	21	29	118	80	0	0	-16646353			749	21	29	63	82	0	0	-16727790
	750	21	30	85	82	0	0	-16711895			750	21	30	167	120	4.489	0.898	-16711925		750	21	30	61	84	2.438	0.488	-16591580			750	21	30	120	84	2.57014	0.514027	-15801290			750	21	30	63	82	0	0	-16732916
	751	21	31	85	82	0	0	-16646353			751	21	31	163	121	2.37	0.474	-16319469		751	21	31	70	88	5.66	1.132	-16711903			751	21	31	118	92	4.7391	0.94782	-15944143			751	21	31	63	82	0	0	-16740858
	752	21	32	85	82	0	0	-16515278			752	21	32	155	124	4.91	0.982	-16711926		752	21	32	70	88	0	0	-16646365			752	21	32	118	99	4.0229	0.80458	-16744937			752	21	32	63	90	4.5976	0.91952	-16713967
	753	21	33	85	82	0	0	-16711897			753	21	33	147	124	4.598	0.92	-16711926		753	21	33	70	88	0	0	-16716517			753	21	33	118	99	0	0	-16740836			753	21	33	63	90	0	0	-16718073
	754	21	34	85	82	0	0	-16711910			754	21	34	137	121	6	1.2	-16711936		754	21	34	48	83	12.966	2.593	-16732650			754	21	34	118	99	0	0	-16740828			754	21	34	63	90	0	0	-15794412
	755	21	35	85	82	0	0	-16711913			755	21	35	125	112	8.62	1.724	-16515819		755	21	35	48	83	0	0	-15925437			755	21	35	118	99	0	0	-16677335			755	21	35	63	90	0	0	-16581111
	756	21	36	85	82	0	0	-16711915			756	21	36	119	105	5.298	1.06	-16713951		756	21	36	35	93	9.426	1.885	-16063409			756	21	36	119	111	6.9203	1.38406	-16749560			756	21	36	63	90	0	0	-16449788
	757	22	1	68	66	-1	-1	-16711934			757	22	1	72	89	-1	-1	-16384248		757	22	1	46	85	-1	-1	-16384244			757	22	1	59	150	-1	-1	-16711921			757	22	1	29	56	-1	-1	-16711925
	758	22	2	68	64	1.1494	0.22988	-16711933			758	22	2	72	89	0	0	-16122091		758	22	2	46	76	5.172	1.034	-16711935			758	22	2	59	146	2.2988	0.45976	-16712667			758	22	2	32	58	2.07211	0.414422	-16059367
	759	22	3	68	64	0	0	-16711926			759	22	3	72	84	2.873	0.575	-16714436		759	22	3	46	76	0	0	-16515319			759	22	3	59	146	0	0	-16672503			759	22	3	37	58	2.8735	0.5747	-16711935
	760	22	4	68	64	0	0	-16384240			760	22	4	69	79	3.351	0.67	-16712604		760	22	4	46	76	0	0	-16385009			760	22	4	66	144	4.18388	0.836776	-16711852			760	22	4	41	60	2.57014	0.514027	-16646641
	761	22	5	67	65	0.812749	0.16255	-16253674			761	22	5	69	79	0	0	-16711823		761	22	5	46	76	0	0	-15992563			761	22	5	66	144	0	0	-16386984			761	22	5	43	62	1.6255	0.325099	-16515565
	762	22	6	67	68	1.7241	0.34482	-16711916			762	22	6	69	79	0	0	-16711822		762	22	6	46	76	0	0	-16712446			762	22	6	66	144	0	0	-16712126			762	22	6	48	63	2.93041	0.586081	-16065262
	763	22	7	67	68	0	0	-16711930			763	22	7	69	79	0	0	-16711829		763	22	7	46	76	0	0	-16711935			763	22	7	66	144	0	0	-16123837			763	22	7	56	63	4.5976	0.91952	-16457197
	764	22	8	67	68	0	0	-16711931			764	22	8	69	79	0	0	-16712577		764	22	8	46	73	1.724	0.345	-16711926			764	22	8	66	144	0	0	-15860414			764	22	8	55	64	0.812749	0.16255	-16057326
	765	22	9	67	68	0	0	-16711926			765	22	9	69	79	0	0	-15401331		765	22	9	47	67	3.496	0.699	-16056554			765	22	9	68	145	1.28507	0.257014	-16712900			765	22	9	55	64	0	0	-16453096
	766	22	10	67	68	0	0	-16646388			766	22	10	69	75	2.299	0.46	-16187484		766	22	10	47	67	0	0	-16452847			766	22	10	68	145	0	0	-16711879			766	22	10	55	64	0	0	-16452837
	767	22	11	67	68	0	0	-16516338			767	22	11	74	74	2.93	0.586	-16711843		767	22	11	47	67	0	0	-16711933			767	22	11	68	145	0	0	-15925431			767	22	11	55	64	0	0	-15867630
	768	22	12	67	68	0	0	-16647908			768	22	12	81	87	8.485	1.697	-15598582		768	22	12	47	67	0	0	-16711936			768	22	12	68	145	0	0	-16711868			768	22	12	55	64	0	0	-15141591
	769	22	13	68	68	0.5747	0.11494	-16711911			769	22	13	81	101	8.046	1.609	-16711936		769	22	13	47	67	0	0	-16711932			769	22	13	74	148	3.8552	0.771041	-16074657			769	22	13	60	65	2.93041	0.586081	-16130023
	770	22	14	68	68	0	0	-16712429			770	22	14	78	106	3.351	0.67	-16712957		770	22	14	50	63	2.873	0.575	-16122355			770	22	14	74	148	0	0	-15878567			770	22	14	60	65	0	0	-16385761
	771	22	15	68	68	0	0	-16711911			771	22	15	71	107	4.064	0.813	-16122100		771	22	15	50	63	0	0	-16449772			771	22	15	72	142	3.63472	0.726944	-15352626			771	22	15	60	65	0	0	-16580844
	772	22	16	68	68	0	0	-16580834			772	22	16	71	113	3.448	0.69	-16711936		772	22	16	50	63	0	0	-16712945			772	22	16	76	144	2.57014	0.514027	-16723969			772	22	16	60	65	0	0	-16581855
	773	22	17	68	68	0	0	-16385501			773	22	17	71	113	0	0	-16713984		773	22	17	50	63	0	0	-16318693			773	22	17	76	144	0	0	-16065042			773	22	17	60	65	0	0	-16648675
	774	22	18	68	68	0	0	-16711930			774	22	18	71	113	0	0	-16712960		774	22	18	51	63	0.575	0.115	-16056548			774	22	18	76	144	0	0	-16457985			774	22	18	65	63	3.09485	0.618971	-15664098
	775	22	19	68	68	0	0	-16711926			775	22	19	71	113	0	0	-16711936		775	22	19	51	63	0	0	-16582643			775	22	19	76	144	0	0	-16003073			775	22	19	65	63	0	0	-16651231
	776	22	20	68	68	0	0	-16711908			776	22	20	71	113	0	0	-16711935		776	22	20	51	63	0	0	-16518386			776	22	20	76	144	0	0	-16134659			776	22	20	65	63	0	0	-16388835
	777	22	21	68	68	0	0	-16711901			777	22	21	71	113	0	0	-16385276		777	22	21	51	63	0	0	-16255468			777	22	21	85	140	5.66014	1.13203	-16741840			777	22	21	65	63	0	0	-16255698
	778	22	22	68	68	0	0	-16449756			778	22	22	76	111	3.095	0.619	-16518390		778	22	22	51	63	0	0	-16386281			778	22	22	85	140	0	0	-16738753			778	22	22	65	63	0	0	-16712661
	779	22	23	68	68	0	0	-16711902			779	22	23	76	111	0	0	-15599337		779	22	23	51	63	0	0	-16254954			779	22	23	85	140	0	0	-16736706			779	22	23	69	63	2.2988	0.45976	-16391145
	780	22	24	68	68	0	0	-16712929			780	22	24	76	111	0	0	-15993843		780	22	24	51	63	0	0	-16192760			780	22	24	85	140	0	0	-16739254			780	22	24	69	63	0	0	-16721381
	781	22	25	71	67	1.81736	0.363472	-15663330			781	22	25	76	111	0	0	-15927547		781	22	25	60	67	5.66	1.132	-16647141			781	22	25	94	146	6.21633	1.24327	-16350435			781	22	25	69	63	0	0	-16719610
	782	22	26	71	67	0	0	-15992527			782	22	26	76	111	0	0	-15600109		782	22	26	60	67	0	0	-16713706			782	22	26	93	146	0.5747	0.11494	-16611037			782	22	26	69	63	0	0	-16716263
	783	22	27	71	67	0	0	-16319192			783	22	27	76	111	0	0	-15534055		783	22	27	60	67	0	0	-16647654			783	22	27	98	142	3.67988	0.735975	-16741091			783	22	27	69	63	0	0	-16722934
	784	22	28	71	67	0	0	-16711906			784	22	28	76	111	0	0	-16717824		784	22	28	60	67	0	0	-16581342			784	22	28	97	142	0.5747	0.11494	-16473300			784	22	28	69	63	0	0	-16726782
	785	22	29	71	67	0	0	-16711902			785	22	29	79	109	2.072	0.414	-16711934		785	22	29	60	67	0	0	-16384733			785	22	29	96	142	0.5747	0.11494	-16732639			785	22	29	69	63	0	0	-16726522
	786	22	30	71	67	0	0	-16711917			786	22	30	79	109	0	0	-16712445		786	22	30	60	67	0	0	-16712422			786	22	30	96	142	0	0	-16736217			786	22	30	69	63	0	0	-16468707
	787	22	31	71	67	0	0	-16711905			787	22	31	79	109	0	0	-15991037		787	22	31	60	67	0	0	-16646890			787	22	31	96	142	0	0	-16739792			787	22	31	69	63	0	0	-16734434
	788	22	32	71	67	0	0	-16711910			788	22	32	79	109	0	0	-16712692		788	22	32	60	67	0	0	-16647384			788	22	32	96	142	0	0	-16544732			788	22	32	69	63	0	0	-16740076
	789	22	33	71	67	0	0	-16711917			789	22	33	79	109	0	0	-16188659		789	22	33	60	67	0	0	-16254671			789	22	33	96	142	0	0	-16676035			789	22	33	69	63	0	0	-16739836
	790	22	34	74	63	2.8735	0.5747	-16712930			790	22	34	79	109	0	0	-16515314		790	22	34	60	67	0	0	-16712154			790	22	34	104	150	6.50199	1.3004	-16753144			790	22	34	69	63	0	0	-16731885
	791	22	35	74	63	0	0	-15927247			791	22	35	79	109	0	0	-16711928		791	22	35	60	67	0	0	-16581853			791	22	35	104	150	0	0	-16752613			791	22	35	69	63	0	0	-16735744
	792	22	36	74	63	0	0	-16254919			792	22	36	79	109	0	0	-16712696		792	22	36	59	67	0.575	0.115	-16516311			792	22	36	104	150	0	0	-16750565			792	22	36	69	63	0	0	-16730103
	793	23	1	65	134	-1	-1	-16712439			793	23	1	85	26	-1	-1	-16711936		793	23	1	73	17	-1	-1	-16711936			793	23	1	31	133	-1	-1	-16711904			793	23	1	92	60	-1	-1	-16582140
	794	23	2	65	134	0	0	-16711918			794	23	2	86	23	1.817	0.363	-16122368		794	23	2	73	13	2.299	0.46	-16711924			794	23	2	34	134	1.81736	0.363472	-15669722			794	23	2	104	58	6.99153	1.39831	-16721662
	795	23	3	66	130	2.37	0.474	-16711919			795	23	3	82	22	2.37	0.474	-16581376		795	23	3	72	12	0.813	0.163	-16583922			795	23	3	36	131	2.07211	0.414422	-16322782			795	23	3	104	58	0	0	-16063469
	796	23	4	66	130	0	0	-16712156			796	23	4	82	22	0	0	-16515313		796	23	4	72	12	0	0	-16711903			796	23	4	36	131	0	0	-16580828			796	23	4	104	58	0	0	-16318708
	797	23	5	66	130	0	0	-16515289			797	23	5	82	22	0	0	-16449773		797	23	5	72	11	0.575	0.115	-16187612			797	23	5	36	131	0	0	-16712157			797	23	5	104	58	0	0	-16451324
	798	23	6	66	130	0	0	-16188374			798	23	6	82	22	0	0	-16646894		798	23	6	72	11	0	0	-16711898			798	23	6	36	131	0	0	-16712415			798	23	6	104	58	0	0	-16449781
	799	23	7	70	129	2.37	0.474	-16712421			799	23	7	82	22	0	0	-16646358		799	23	7	72	11	0	0	-16714468			799	23	7	40	128	2.8735	0.5747	-16725483			799	23	7	104	58	0	0	-16711933
	800	23	8	70	129	0	0	-16711892			800	23	8	82	22	0	0	-16711897		800	23	8	72	11	0	0	-16318679			800	23	8	40	128	0	0	-16722153			800	23	8	104	58	0	0	-16711924
	801	23	9	70	129	0	0	-15992524			801	23	9	79	27	3.351	0.67	-16711889		801	23	9	72	11	0	0	-16713947			801	23	9	40	128	0	0	-16590038			801	23	9	104	58	0	0	-16711921
	802	23	10	74	125	3.251	0.65	-16711891			802	23	10	75	31	3.251	0.65	-16720123		802	23	10	72	11	0	0	-16713431			802	23	10	40	128	0	0	-16721384			802	23	10	104	58	0	0	-16711912
	803	23	11	74	125	0	0	-16515299			803	23	11	75	31	0	0	-16711913		803	23	11	72	11	0	0	-16646355			803	23	11	40	128	0	0	-16391883			803	23	11	104	58	0	0	-16711922
	804	23	12	74	125	0	0	-16711902			804	23	12	75	31	0	0	-16714482		804	23	12	72	11	0	0	-15991232			804	23	12	42	131	2.07211	0.414422	-16065726			804	23	12	104	58	0	0	-16711925
	805	23	13	74	125	0	0	-16711900			805	23	13	73	38	4.184	0.837	-15991025		805	23	13	72	11	0	0	-16716490			805	23	13	42	131	0	0	-16262592			805	23	13	104	58	0	0	-16711930
	806	23	14	74	125	0	0	-16711902			806	23	14	73	44	3.448	0.69	-16603639		806	23	14	72	11	0	0	-16122064			806	23	14	42	131	0	0	-16520393			806	23	14	104	58	0	0	-16711926
	807	23	15	74	125	0	0	-16384212			807	23	15	73	44	0	0	-15482353		807	23	15	72	11	0	0	-16711902			807	23	15	42	131	0	0	-16058302			807	23	15	104	58	0	0	-16711919
	808	23	16	74	125	0	0	-16711908			808	23	16	67	55	7.201	1.44	-15282658		808	23	16	72	11	0	0	-16711868			808	23	16	42	131	0	0	-16190907			808	23	16	104	58	0	0	-16384231
	809	23	17	74	125	0	0	-16711907			809	23	17	65	62	4.184	0.837	-16720118		809	23	17	72	11	0	0	-16711897			809	23	17	42	131	0	0	-15997113			809	23	17	104	58	0	0	-15991525
	810	23	18	74	125	0	0	-16711901			810	23	18	65	62	0	0	-16716520		810	23	18	74	14	2.072	0.414	-16712394			810	23	18	42	131	0	0	-16715957			810	23	18	104	58	0	0	-16711915
	811	23	19	72	125	1.149	0.23	-16711906			811	23	19	65	62	0	0	-16253918		811	23	19	74	14	0	0	-16713154			811	23	19	42	131	0	0	-16388021			811	23	19	104	58	0	0	-16711910
	812	23	20	72	125	0	0	-16711911			812	23	20	65	62	0	0	-16319461		812	23	20	74	14	0	0	-16711890			812	23	20	42	131	0	0	-15599795			812	23	20	104	58	0	0	-16711917
	813	23	21	72	125	0	0	-16515280			813	23	21	65	62	0	0	-16058591		813	23	21	74	14	0	0	-15926731			813	23	21	42	131	0	0	-16457151			813	23	21	104	58	0	0	-16253161
	814	23	22	72	125	0	0	-16711890			814	23	22	65	62	0	0	-15666667		814	23	22	74	14	0	0	-16713157			814	23	22	42	131	0	0	-16263115			814	23	22	104	58	0	0	-16384733
	815	23	23	71	125	0.575	0.115	-16320209			815	23	23	65	62	0	0	-16717811		815	23	23	74	14	0	0	-16711869			815	23	23	42	131	0	0	-15935934			815	23	23	104	58	0	0	-16713191
	816	23	24	71	125	0	0	-16057047			816	23	24	67	59	2.072	0.414	-16720640		816	23	24	74	14	0	0	-16580800			816	23	24	42	131	0	0	-15868339			816	23	24	104	58	0	0	-16711921
	817	23	25	71	125	0	0	-16253143			817	23	25	67	59	0	0	-16320223		817	23	25	74	14	0	0	-16711862			817	23	25	46	129	2.57014	0.514027	-16727481			817	23	25	104	58	0	0	-16711907
	818	23	26	71	125	0	0	-16711899			818	23	26	67	59	0	0	-16719340		818	23	26	76	14	1.149	0.23	-16711890			818	23	26	46	129	0	0	-16734644			818	23	26	104	58	0	0	-16711917
	819	23	27	71	125	0	0	-16449748			819	23	27	67	59	0	0	-16725242		819	23	27	76	14	0	0	-16711892			819	23	27	46	129	0	0	-16733882			819	23	27	104	58	0	0	-16711914
	820	23	28	71	125	0	0	-16384219			820	23	28	67	59	0	0	-16194781		820	23	28	76	14	0	0	-16711872			820	23	28	46	129	0	0	-16739010			820	23	28	104	58	0	0	-16711915
	821	23	29	71	125	0	0	-16711893			821	23	29	67	59	0	0	-16453850		821	23	29	76	14	0	0	-16646344			821	23	29	46	129	0	0	-16741059			821	23	29	104	58	0	0	-16711901
	822	23	30	71	125	0	0	-16384195			822	23	30	67	59	0	0	-16327131		822	23	30	76	14	0	0	-16711874			822	23	30	46	136	4.0229	0.80458	-16750275			822	23	30	104	58	0	0	-16449751
	823	23	31	71	125	0	0	-16711888			823	23	31	67	59	0	0	-16130005		823	23	31	76	14	0	0	-16713667			823	23	31	46	130	3.4482	0.68964	-16084670			823	23	31	104	58	0	0	-15732425
	824	23	32	77	124	3.496	0.699	-16188860			824	23	32	67	59	0	0	-15665605		824	23	32	76	14	0	0	-16713401			824	23	32	44	132	1.6255	0.325099	-16003747			824	23	32	104	58	0	0	-15731910
	825	23	33	77	124	0	0	-16123582			825	23	33	67	59	0	0	-15731655		825	23	33	79	14	1.724	0.345	-16384197			825	23	33	44	132	0	0	-15874990			825	23	33	109	66	5.42171	1.08434	-16711899
	826	23	34	77	124	0	0	-16711879			826	23	34	67	59	0	0	-15143621		826	23	34	79	14	0	0	-16122035			826	23	34	44	132	0	0	-16136886			826	23	34	109	66	0	0	-16711899
	827	23	35	77	124	0	0	-16711870			827	23	35	67	59	0	0	-16719832		827	23	35	79	14	0	0	-16188874			827	23	35	44	132	0	0	-15414441			827	23	35	109	66	0	0	-16056529
	828	23	36	77	124	0	0	-14683570			828	23	36	67	59	0	0	-15736259		828	23	36	79	14	0	0	-16515287			828	23	36	44	132	0	0	-15940787			828	23	36	109	66	0	0	-16450518
	829	24	1	156	95	-1	-1	-16711932			829	24	1	90	139	-1	-1	-16450301		829	24	1	85	104	-1	-1	-16711936			829	24	1	108	89	-1	-1	-16264173			829	24	1	99	79	-1	-1	-16714459
	830	24	2	156	95	0	0	-16582128			830	24	2	90	137	1.149	0.23	-16711936		830	24	2	84	102	1.285	0.257	-15665138			830	24	2	112	90	2.36955	0.47391	-16397045			830	24	2	99	81	1.1494	0.22988	-16711890
	831	24	3	156	95	0	0	-16712172			831	24	3	90	137	0	0	-16711936		831	24	3	82	99	2.072	0.414	-16711936			831	24	3	112	90	0	0	-15997929			831	24	3	99	81	0	0	-16712651
	832	24	4	156	95	0	0	-16711931			832	24	4	90	137	0	0	-16711936		832	24	4	82	98	0.575	0.115	-16711931			832	24	4	112	90	0	0	-16658680			832	24	4	99	81	0	0	-16648146
	833	24	5	156	95	0	0	-16321785			833	24	5	85	135	3.095	0.619	-15926272		833	24	5	82	98	0	0	-16711936			833	24	5	115	90	1.7241	0.34482	-16272623			833	24	5	99	81	0	0	-16123091
	834	24	6	159	90	3.351	0.67	-16711921			834	24	6	85	135	0	0	-15794430		834	24	6	82	98	0	0	-16711936			834	24	6	115	90	0	0	-16731375			834	24	6	99	81	0	0	-16319946
	835	24	7	159	90	0	0	-16515322			835	24	7	85	135	0	0	-16711936		835	24	7	80	97	1.285	0.257	-16188399			835	24	7	115	90	0	0	-15747554			835	24	7	99	81	0	0	-16258504
	836	24	8	159	90	0	0	-16713960			836	24	8	85	135	0	0	-16385024		836	24	8	80	97	0	0	-15860974			836	24	8	115	90	0	0	-16403182			836	24	8	99	81	0	0	-16722387
	837	24	9	159	90	0	0	-14746320			837	24	9	85	135	0	0	-16711936		837	24	9	80	97	0	0	-15532270			837	24	9	115	95	2.8735	0.5747	-16739578			837	24	9	99	81	0	0	-16725454
	838	24	10	165	85	4.489	0.898	-16711924			838	24	10	85	135	0	0	-16711930		838	24	10	80	97	0	0	-16711928			838	24	10	115	95	0	0	-16741621			838	24	10	99	81	0	0	-16725947
	839	24	11	165	85	0	0	-16711921			839	24	11	85	135	0	0	-15925490		839	24	11	80	97	0	0	-16711936			839	24	11	115	95	0	0	-16545262			839	24	11	99	81	0	0	-16727724
	840	24	12	165	85	0	0	-16711919			840	24	12	85	135	0	0	-15927031		840	24	12	75	90	4.944	0.989	-16711936			840	24	12	116	87	4.63338	0.926676	-16729073			840	24	12	99	81	0	0	-16664482
	841	24	13	165	85	0	0	-16187628			841	24	13	85	135	0	0	-16711936		841	24	13	80	93	3.351	0.67	-16582906			841	24	13	116	87	0	0	-16331244			841	24	13	99	81	0	0	-16271257
	842	24	14	165	85	0	0	-16580848			842	24	14	85	135	0	0	-16711936		842	24	14	80	93	0	0	-16515834			842	24	14	116	87	0	0	-16727794			842	24	14	99	81	0	0	-16603291
	843	24	15	165	85	0	0	-16056546			843	24	15	88	133	2.072	0.414	-16515308		843	24	15	80	93	0	0	-16580850			843	24	15	116	87	0	0	-16736246			843	24	15	99	81	0	0	-16274586
	844	24	16	165	85	0	0	-15008973			844	24	16	88	133	0	0	-16515327		844	24	16	80	93	0	0	-16515321			844	24	16	117	81	3.49576	0.699153	-16738810			844	24	16	98	80	0.812749	0.16255	-15289534
	845	24	17	165	85	0	0	-15799005			845	24	17	88	133	0	0	-16711930		845	24	17	80	93	0	0	-16515314			845	24	17	117	81	0	0	-16734449			845	24	17	98	80	0	0	-16340686
	846	24	18	162	86	1.817	0.363	-16711919			846	24	18	88	133	0	0	-16711936		846	24	18	80	93	0	0	-16318968			846	24	18	117	81	0	0	-16735219			846	24	18	98	80	0	0	-16403166
	847	24	19	162	86	0	0	-16449772			847	24	19	88	133	0	0	-16711927		847	24	19	80	90	1.724	0.345	-16712439			847	24	19	117	81	0	0	-16472294			847	24	19	98	80	0	0	-16731368
	848	24	20	162	86	0	0	-16711915			848	24	20	88	133	0	0	-16711934		848	24	20	80	90	0	0	-16581374			848	24	20	117	82	0.5747	0.11494	-16668907			848	24	20	98	80	0	0	-16732411
	849	24	21	162	86	0	0	-16711917			849	24	21	88	133	0	0	-16711931		849	24	21	78	81	5.298	1.06	-16450024			849	24	21	109	84	4.7391	0.94782	-16354034			849	24	21	103	79	2.93041	0.586081	-16733151
	850	24	22	162	86	0	0	-16711904			850	24	22	88	133	0	0	-16057334		850	24	22	78	81	0	0	-16253163			850	24	22	109	84	0	0	-16157938			850	24	22	103	79	0	0	-16729824
	851	24	23	162	86	0	0	-16711925			851	24	23	88	133	0	0	-16580858		851	24	23	78	81	0	0	-16384476			851	24	23	114	83	2.93041	0.586081	-15754723			851	24	23	103	79	0	0	-16663503
	852	24	24	162	86	0	0	-16711903			852	24	24	88	133	0	0	-16646640		852	24	24	78	81	0	0	-16711913			852	24	24	114	83	0	0	-15756004			852	24	24	103	79	0	0	-16731608
	853	24	25	162	86	0	0	-16712158			853	24	25	91	132	1.817	0.363	-16581602		853	24	25	78	81	0	0	-16581861			853	24	25	114	83	0	0	-15821539			853	24	25	103	79	0	0	-16664518
	854	24	26	162	86	0	0	-16712412			854	24	26	91	132	0	0	-16711912		854	24	26	78	81	0	0	-16711917			854	24	26	114	83	0	0	-16283112			854	24	26	103	79	0	0	-16534215
	855	24	27	162	86	0	0	-16123093			855	24	27	91	132	0	0	-16711910		855	24	27	76	77	2.57	0.514	-16711895			855	24	27	114	83	0	0	-16480239			855	24	27	103	79	0	0	-16667353
	856	24	28	162	86	0	0	-15926993			856	24	28	91	132	0	0	-16711915		856	24	28	76	77	0	0	-16711901			856	24	28	114	83	0	0	-15892196			856	24	28	103	79	0	0	-16734955
	857	24	29	162	86	0	0	-15599819			857	24	29	91	132	0	0	-16647393		857	24	29	76	77	0	0	-16711880			857	24	29	114	83	0	0	-16218849			857	24	29	103	79	0	0	-16733673
	858	24	30	162	86	0	0	-15805652			858	24	30	91	132	0	0	-16319457		858	24	30	76	77	0	0	-16711877			858	24	30	114	83	0	0	-16420068			858	24	30	103	79	0	0	-16737258
	859	24	31	165	85	1.817	0.363	-16515289			859	24	31	91	132	0	0	-16515565		859	24	31	76	77	0	0	-16711865			859	24	31	114	83	0	0	-16755184			859	24	31	103	79	0	0	-16543465
	860	24	32	165	85	0	0	-16711912			860	24	32	91	132	0	0	-16515817		860	24	32	76	77	0	0	-16583347			860	24	32	114	83	0	0	-16755184			860	24	32	103	79	0	0	-16737766
	861	24	33	165	85	0	0	-16711902			861	24	33	90	127	2.93	0.586	-16711936		861	24	33	76	77	0	0	-15532199			861	24	33	114	83	0	0	-16757486			861	24	33	103	79	0	0	-16738798
	862	24	34	165	85	0	0	-15925457			862	24	34	90	127	0	0	-16711913		862	24	34	76	77	0	0	-15925400			862	24	34	114	83	0	0	-16755178			862	24	34	103	79	0	0	-16738544
	863	24	35	166	79	3.496	0.699	-16711912			863	24	35	90	127	0	0	-16712162		863	24	35	76	77	0	0	-14418324			863	24	35	113	87	2.36955	0.47391	-16279780			863	24	35	103	79	0	0	-16732896
	864	24	36	166	79	0	0	-16711902			864	24	36	90	127	0	0	-16711906		864	24	36	76	77	0	0	-15011464			864	24	36	113	87	0	0	-16736482			864	24	36	103	79	0	0	-16736234
	865	25	1	96	100	-1	-1	-16712443			865	25	1	32	76	-1	-1	-16450042		865	25	1	49	66	-1	-1	-16712192			865	25	1	109	87	-1	-1	-16741629			865	25	1	44	63	-1	-1	-16646904
	866	25	2	96	100	0	0	-16711934			866	25	2	32	74	1.149	0.23	-16711936		866	25	2	49	66	0	0	-16712192			866	25	2	122	84	7.66745	1.53349	-16486138			866	25	2	45	63	0.5747	0.11494	-16122094
	867	25	3	96	100	0	0	-16711926			867	25	3	33	75	0.813	0.163	-16580862		867	25	3	49	66	0	0	-16384240			867	25	3	120	84	1.1494	0.22988	-16343026			867	25	3	45	63	0	0	-16517626
	868	25	4	96	100	0	0	-16711936			868	25	4	33	77	1.149	0.23	-16516348		868	25	4	49	66	0	0	-15926516			868	25	4	120	84	0	0	-15821034			868	25	4	45	63	0	0	-16451320
	869	25	5	98	98	1.625	0.325	-16711927			869	25	5	38	82	4.064	0.813	-16712448		869	25	5	49	66	0	0	-16261879			869	25	5	120	84	0	0	-16353521			869	25	5	45	63	0	0	-16056813
	870	25	6	98	98	0	0	-16580847			870	25	6	38	82	0	0	-16711936		870	25	6	46	61	3.351	0.67	-16712685			870	25	6	120	84	0	0	-16085222			870	25	6	45	63	0	0	-16123109
	871	25	7	98	98	0	0	-15729640			871	25	7	38	86	2.299	0.46	-16711936		871	25	7	46	61	0	0	-16190189			871	25	7	117	86	2.07211	0.414422	-15607003			871	25	7	45	63	0	0	-15469791
	872	25	8	100	94	2.57	0.514	-16712673			872	25	8	41	87	1.817	0.363	-16711936		872	25	8	46	61	0	0	-16253163			872	25	8	117	86	0	0	-16198889			872	25	8	50	60	3.35105	0.67021	-16711927
	873	25	9	100	94	0	0	-16320490			873	25	9	41	87	0	0	-16711936		873	25	9	46	61	0	0	-16384237			873	25	9	117	86	0	0	-16723451			873	25	9	50	60	0	0	-16711925
	874	25	10	100	94	0	0	-16711924			874	25	10	43	93	3.635	0.727	-16318705		874	25	10	46	61	0	0	-16187632			874	25	10	117	86	0	0	-16723955			874	25	10	50	60	0	0	-16646379
	875	25	11	100	94	0	0	-16711909			875	25	11	54	108	10.69	2.138	-16582131		875	25	11	46	61	0	0	-16713201			875	25	11	117	86	0	0	-16594927			875	25	11	50	60	0	0	-16450279
	876	25	12	103	90	2.873	0.575	-16711927			876	25	12	61	119	7.493	1.499	-16711932		876	25	12	46	61	0	0	-16711932			876	25	12	117	86	0	0	-16336106			876	25	12	50	60	0	0	-15142366
	877	25	13	103	90	0	0	-16711922			877	25	13	66	123	3.68	0.736	-16711936		877	25	13	46	61	0	0	-16384246			877	25	13	117	86	0	0	-16076519			877	25	13	50	60	0	0	-15083983
	878	25	14	103	90	0	0	-16711922			878	25	14	66	123	0	0	-16319738		878	25	14	46	61	0	0	-16711936			878	25	14	117	86	0	0	-16602601			878	25	14	57	61	4.06374	0.812749	-16411117
	879	25	15	103	90	0	0	-16711928			879	25	15	66	123	0	0	-16713216		879	25	15	46	61	0	0	-16711936			879	25	15	117	86	0	0	-16734447			879	25	15	70	60	7.49317	1.49863	-16009962
	880	25	16	103	90	0	0	-16712948			880	25	16	66	123	0	0	-16580858		880	25	16	46	61	0	0	-16712960			880	25	16	117	86	0	0	-16734959			880	25	16	70	60	0	0	-16268522
	881	25	17	103	90	0	0	-16450544			881	25	17	62	116	4.633	0.927	-16711912		881	25	17	46	61	0	0	-16711933			881	25	17	117	86	0	0	-16739822			881	25	17	70	60	0	0	-16135909
	882	25	18	103	90	0	0	-16711914			882	25	18	58	114	2.57	0.514	-16646358		882	25	18	50	58	2.873	0.575	-16711918			882	25	18	123	87	3.49576	0.699153	-16742632			882	25	18	70	60	0	0	-16719593
	883	25	19	100	91	1.817	0.363	-16188904			883	25	19	58	114	0	0	-16711863		883	25	19	50	58	0	0	-16711918			883	25	19	125	92	3.09485	0.618971	-16014550			883	25	19	70	60	0	0	-16723949
	884	25	20	100	91	0	0	-16711928			884	25	20	58	114	0	0	-16711869		884	25	20	50	58	0	0	-16712178			884	25	20	125	92	0	0	-16211414			884	25	20	70	60	0	0	-16723432
	885	25	21	100	91	0	0	-16581099			885	25	21	59	109	2.93	0.586	-16711895		885	25	21	50	58	0	0	-16515320			885	25	21	125	92	0	0	-15751630			885	25	21	70	60	0	0	-16203231
	886	25	22	100	91	0	0	-16516072			886	25	22	59	109	0	0	-16449727		886	25	22	50	58	0	0	-16646400			886	25	22	124	93	0.812749	0.16255	-15944145			886	25	22	81	61	6.34777	1.26955	-16722157
	887	25	23	100	91	0	0	-16711908			887	25	23	59	109	0	0	-16711860		887	25	23	50	58	0	0	-16515320			887	25	23	124	93	0	0	-15549133			887	25	23	81	61	0	0	-16000991
	888	25	24	100	91	0	0	-16711918			888	25	24	59	109	0	0	-16711853		888	25	24	50	58	0	0	-16449786			888	25	24	124	93	0	0	-15549905			888	25	24	81	61	0	0	-15473616
	889	25	25	100	91	0	0	-16711927			889	25	25	59	109	0	0	-16711837		889	25	25	50	58	0	0	-16582138			889	25	25	124	93	0	0	-15549387			889	25	25	81	61	0	0	-16651229
	890	25	26	100	91	0	0	-16711917			890	25	26	59	109	0	0	-16711812		890	25	26	50	58	0	0	-16384255			890	25	26	124	93	0	0	-15018933			890	25	26	81	61	0	0	-15996889
	891	25	27	105	90	2.93	0.586	-16384229			891	25	27	59	109	0	0	-16646260		891	25	27	50	58	0	0	-15992058			891	25	27	124	93	0	0	-15014845			891	25	27	81	61	0	0	-16717036
	892	25	28	105	90	0	0	-16711920			892	25	28	59	109	0	0	-16320616		892	25	28	56	58	3.448	0.69	-16711923			892	25	28	124	93	0	0	-15554518			892	25	28	81	61	0	0	-16717290
	893	25	29	105	90	0	0	-16711908			893	25	29	59	109	0	0	-15730531		893	25	29	56	58	0	0	-16712182			893	25	29	124	102	5.1723	1.03446	-15953877			893	25	29	81	61	0	0	-16652777
	894	25	30	105	90	0	0	-16580839			894	25	30	59	109	0	0	-16450131		894	25	30	56	58	0	0	-16711922			894	25	30	126	114	6.99153	1.39831	-16613060			894	25	30	81	61	0	0	-16587754
	895	25	31	105	90	0	0	-16712664			895	25	31	59	109	0	0	-15466569		895	25	31	56	58	0	0	-16711913			895	25	31	128	122	4.7391	0.94782	-16739984			895	25	31	81	61	0	0	-16257251
	896	25	32	105	90	0	0	-16580819			896	25	32	62	109	1.724	0.345	-16646269		896	25	32	56	58	0	0	-16711915			896	25	32	136	123	4.63338	0.926676	-16753891			896	25	32	81	61	0	0	-16479956
	897	25	33	105	90	0	0	-16711902			897	25	33	62	109	0	0	-16121956		897	25	33	56	58	0	0	-16711921			897	25	33	135	127	2.36955	0.47391	-15016134			897	25	33	81	61	0	0	-15798236
	898	25	34	105	90	0	0	-16516062			898	25	34	62	109	0	0	-16515423		898	25	34	56	58	0	0	-16711917			898	25	34	135	127	0	0	-14425531			898	25	34	81	61	0	0	-16061402
	899	25	35	105	90	0	0	-16711910			899	25	35	62	109	0	0	-16646222		899	25	35	56	58	0	0	-16711915			899	25	35	135	127	0	0	-15277766			899	25	35	81	61	0	0	-16714458
	900	25	36	106	91	0.813	0.163	-16711912			900	25	36	62	109	0	0	-15864116		900	25	36	56	58	0	0	-16711923			900	25	36	135	127	0	0	-14560958			900	25	36	81	61	0	0	-16646884
	901	26	1	82	98	-1	-1	-16058106			901	26	1	51	34	-1	-1	-16711910		901	26	1	57	50	-1	-1	-16711936			901	26	1	100	75	-1	-1	-16733405			901	26	1	46	67	-1	-1	-16712914
	902	26	2	86	99	2.37	0.474	-16711936			902	26	2	52	33	0.813	0.163	-16712130		902	26	2	57	44	3.448	0.69	-16711936			902	26	2	100	71	2.2988	0.45976	-16734183			902	26	2	50	70	2.8735	0.5747	-16580850
	903	26	3	86	99	0	0	-16711936			903	26	3	52	33	0	0	-16449696		903	26	3	57	44	0	0	-16711936			903	26	3	102	78	4.18388	0.836776	-16738264			903	26	3	50	70	0	0	-16580862
	904	26	4	86	99	0	0	-16711936			904	26	4	52	33	0	0	-16711818		904	26	4	57	44	0	0	-16711936			904	26	4	103	77	0.812749	0.16255	-16219351			904	26	4	50	70	0	0	-16646379
	905	26	5	87	89	5.776	1.155	-16385262			905	26	5	52	33	0	0	-16649100		905	26	5	57	44	0	0	-16515328			905	26	5	104	83	3.49576	0.699153	-16355807			905	26	5	50	70	0	0	-16711910
	906	26	6	87	89	0	0	-16516848			906	26	6	50	31	1.625	0.325	-16515521		906	26	6	57	44	0	0	-16715774			906	26	6	104	93	5.747	1.1494	-16551387			906	26	6	50	70	0	0	-16711910
	907	26	7	87	89	0	0	-16646394			907	26	7	50	31	0	0	-16715452		907	26	7	47	47	6	1.2	-16253690			907	26	7	102	105	6.99153	1.39831	-16351441			907	26	7	50	70	0	0	-16711918
	908	26	8	87	89	0	0	-16056556			908	26	8	50	31	0	0	-16384446		908	26	8	47	47	0	0	-16384255			908	26	8	107	116	6.94413	1.38883	-15956429			908	26	8	50	70	0	0	-16711912
	909	26	9	87	89	0	0	-15016424			909	26	9	48	30	1.285	0.257	-16648686		909	26	9	47	47	0	0	-16711929			909	26	9	106	122	3.49576	0.699153	-16673748			909	26	9	50	70	0	0	-16711914
	910	26	10	87	89	0	0	-16736768			910	26	10	48	30	0	0	-16712421		910	26	10	47	47	0	0	-16580850			910	26	10	109	124	2.07211	0.414422	-16546248			910	26	10	50	70	0	0	-15859918
	911	26	11	89	84	3.095	0.619	-16122102			911	26	11	48	30	0	0	-16713193		911	26	11	47	47	0	0	-16517113			911	26	11	109	124	0	0	-16677070			911	26	11	50	70	0	0	-16451019
	912	26	12	89	84	0	0	-16385001			912	26	12	48	30	0	0	-15925989		912	26	12	42	47	2.873	0.575	-16711903			912	26	12	109	124	0	0	-16546515			912	26	12	50	70	0	0	-15665864
	913	26	13	89	84	0	0	-16384229			913	26	13	48	30	0	0	-16714462		913	26	13	42	47	0	0	-16711915			913	26	13	109	124	0	0	-16481484			913	26	13	56	74	4.14422	0.828844	-15664609
	914	26	14	89	84	0	0	-16646371			914	26	14	48	30	0	0	-15664096		914	26	14	42	47	0	0	-16711917			914	26	14	109	124	0	0	-16286667			914	26	14	56	74	0	0	-15142877
	915	26	15	89	84	0	0	-16711903			915	26	15	48	30	0	0	-16125679		915	26	15	42	47	0	0	-16253664			915	26	15	109	130	3.4482	0.68964	-16678602			915	26	15	56	74	0	0	-15337435
	916	26	16	89	84	0	0	-16122842			916	26	16	53	32	3.095	0.619	-15794868		916	26	16	42	47	0	0	-15336412			916	26	16	109	130	0	0	-16744654			916	26	16	56	74	0	0	-15928553
	917	26	17	89	84	0	0	-15861715			917	26	17	53	32	0	0	-16711888		917	26	17	42	47	0	0	-16196587			917	26	17	109	130	0	0	-16744139			917	26	17	56	74	0	0	-16318707
	918	26	18	89	84	0	0	-16714225			918	26	18	53	32	0	0	-16713686		918	26	18	44	49	1.625	0.325	-16646643			918	26	18	109	130	0	0	-16746439			918	26	18	56	74	0	0	-16318959
	919	26	19	93	85	2.37	0.474	-16057837			919	26	19	53	32	0	0	-16711880		919	26	19	44	49	0	0	-16449777			919	26	19	109	130	0	0	-16416705			919	26	19	56	74	0	0	-16713455
	920	26	20	93	85	0	0	-16253423			920	26	20	52	30	1.285	0.257	-15469297		920	26	20	44	49	0	0	-16386032			920	26	20	109	130	0	0	-16484546			920	26	20	56	74	0	0	-16515559
	921	26	21	93	85	0	0	-16187628			921	26	21	52	30	0	0	-16384484		921	26	21	44	49	0	0	-16391921			921	26	21	109	130	0	0	-16749262			921	26	21	56	74	0	0	-16712169
	922	26	22	93	85	0	0	-16712172			922	26	22	54	30	1.149	0.23	-16449713		922	26	22	45	55	3.496	0.699	-16711916			922	26	22	109	130	0	0	-16225997			922	26	22	56	74	0	0	-16450279
	923	26	23	93	85	0	0	-16580842			923	26	23	54	30	0	0	-16711881		923	26	23	45	55	0	0	-16711920			923	26	23	109	130	0	0	-16624604			923	26	23	56	74	0	0	-16189154
	924	26	24	93	85	0	0	-16516335			924	26	24	54	30	0	0	-15995323		924	26	24	45	55	0	0	-16711917			924	26	24	109	130	0	0	-16621773			924	26	24	56	74	0	0	-15993065
	925	26	25	93	85	0	0	-16385763			925	26	25	54	30	0	0	-16712148		925	26	25	45	55	0	0	-16711918			925	26	25	110	133	1.81736	0.363472	-16740546			925	26	25	56	74	0	0	-16715243
	926	26	26	93	85	0	0	-16253414			926	26	26	56	28	1.625	0.325	-16187574		926	26	26	45	55	0	0	-16711916			926	26	26	113	135	2.07211	0.414422	-16609461			926	26	26	56	74	0	0	-16720622
	927	26	27	93	85	0	0	-16450277			927	26	27	56	28	0	0	-16122816		927	26	27	45	55	0	0	-16712184			927	26	27	113	135	0	0	-16736695			927	26	27	56	74	0	0	-16122331
	928	26	28	93	85	0	0	-16516320			928	26	28	56	28	0	0	-16384194		928	26	28	45	55	0	0	-16646381			928	26	28	113	135	0	0	-16745146			928	26	28	56	74	0	0	-16711905
	929	26	29	93	85	0	0	-16713183			929	26	29	56	28	0	0	-15991232		929	26	29	50	56	2.93	0.586	-16711899			929	26	29	112	135	0.5747	0.11494	-16152745			929	26	29	56	74	0	0	-16125401
	930	26	30	93	85	0	0	-16318693			930	26	30	56	28	0	0	-16253632		930	26	30	50	56	0	0	-16711899			930	26	30	117	135	2.8735	0.5747	-16552368			930	26	30	56	74	0	0	-15992024
	931	26	31	93	85	0	0	-16712416			931	26	31	56	28	0	0	-16712886		931	26	31	50	56	0	0	-16712168			931	26	31	121	136	2.36955	0.47391	-16743857			931	26	31	56	74	0	0	-15992543
	932	26	32	93	85	0	0	-16711905			932	26	32	56	28	0	0	-16515270		932	26	32	50	56	0	0	-16711909			932	26	32	127	136	3.4482	0.68964	-16678550			932	26	32	56	74	0	0	-15925992
	933	26	33	93	85	0	0	-16515549			933	26	33	57	32	2.37	0.474	-16384178		933	26	33	50	56	0	0	-16711908			933	26	33	124	136	1.7241	0.34482	-16735905			933	26	33	56	74	0	0	-16318698
	934	26	34	93	85	0	0	-16449762			934	26	34	57	32	0	0	-16384168		934	26	34	52	61	3.095	0.619	-16060337			934	26	34	129	138	3.09485	0.618971	-16672919			934	26	34	56	74	0	0	-15665363
	935	26	35	93	85	0	0	-16384733			935	26	35	57	32	0	0	-16187565		935	26	35	52	61	0	0	-16131773			935	26	35	130	139	0.812749	0.16255	-16540824			935	26	35	56	74	0	0	-16714718
	936	26	36	93	85	0	0	-16450265			936	26	36	57	32	0	0	-16648372		936	26	36	52	61	0	0	-16724144			936	26	36	130	139	0	0	-16734613			936	26	36	56	74	0	0	-15468259
	937	27	1	81	89	-1	-1	-16515328			937	27	1	77	58	-1	-1	-15861504		937	27	1	84	70	-1	-1	-16711936			937	27	1	192	132	-1	-1	-16712431			937	27	1	59	92	-1	-1	-16711931
	938	27	2	81	86	1.724	0.345	-16320508			938	27	2	78	56	1.285	0.257	-16449778		938	27	2	82	72	1.625	0.325	-16713984			938	27	2	195	130	2.07211	0.414422	-16711924			938	27	2	60	87	2.93041	0.586081	-16646384
	939	27	3	81	86	0	0	-16713455			939	27	3	78	56	0	0	-16451840		939	27	3	82	72	0	0	-16711936			939	27	3	195	130	0	0	-16711918			939	27	3	60	87	0	0	-16712694
	940	27	4	81	86	0	0	-16711934			940	27	4	78	56	0	0	-16646390		940	27	4	81	68	2.37	0.474	-16646397			940	27	4	195	130	0	0	-16515549			940	27	4	60	87	0	0	-16711928
	941	27	5	81	86	0	0	-16713440			941	27	5	78	56	0	0	-15663360		941	27	5	81	68	0	0	-16581111			941	27	5	197	131	1.28507	0.257014	-16711920			941	27	5	60	87	0	0	-16711927
	942	27	6	81	86	0	0	-16728302			942	27	6	70	54	4.739	0.948	-16253184		942	27	6	81	68	0	0	-16384762			942	27	6	200	132	1.81736	0.363472	-16711926			942	27	6	60	87	0	0	-16713704
	943	27	7	81	86	0	0	-16752384			943	27	7	64	59	4.489	0.898	-16711936		943	27	7	81	68	0	0	-16385791			943	27	7	200	132	0	0	-16711918			943	27	7	66	89	3.63472	0.726944	-16712675
	944	27	8	88	82	4.633	0.927	-16711927			944	27	8	58	64	4.489	0.898	-16711920		944	27	8	81	68	0	0	-16711929			944	27	8	200	132	0	0	-16646383			944	27	8	66	89	0	0	-16711904
	945	27	9	88	82	0	0	-16711928			945	27	9	53	69	4.064	0.813	-16711931		945	27	9	81	68	0	0	-16318712			945	27	9	200	132	0	0	-15601362			945	27	9	66	89	0	0	-16319441
	946	27	10	88	82	0	0	-16711918			946	27	10	46	71	4.184	0.837	-15926778		946	27	10	81	68	0	0	-16712439			946	27	10	205	131	2.93041	0.586081	-16711913			946	27	10	66	89	0	0	-16122062
	947	27	11	88	82	0	0	-16711920			947	27	11	44	74	2.072	0.414	-16712448		947	27	11	81	68	0	0	-16517100			947	27	11	205	131	0	0	-16449764			947	27	11	66	89	0	0	-16122068
	948	27	12	88	82	0	0	-16711914			948	27	12	41	77	2.438	0.488	-16712192		948	27	12	81	68	0	0	-16452844			948	27	12	205	131	0	0	-16713439			948	27	12	66	89	0	0	-16057041
	949	27	13	88	82	0	0	-16711918			949	27	13	41	77	0	0	-16711936		949	27	13	81	68	0	0	-16060650			949	27	13	205	131	0	0	-15403470			949	27	13	66	89	0	0	-16188106
	950	27	14	88	82	0	0	-16711911			950	27	14	41	77	0	0	-16711936		950	27	14	81	68	0	0	-16319970			950	27	14	209	132	2.36955	0.47391	-16581602			950	27	14	66	89	0	0	-16056523
	951	27	15	88	82	0	0	-16711909			951	27	15	41	77	0	0	-16711935		951	27	15	81	68	0	0	-16716004			951	27	15	209	132	0	0	-16646360			951	27	15	66	89	0	0	-16318930
	952	27	16	91	84	2.072	0.414	-16254695			952	27	16	41	77	0	0	-16711936		952	27	16	81	68	0	0	-16323796			952	27	16	209	132	0	0	-16122073			952	27	16	66	89	0	0	-16646342
	953	27	17	91	84	0	0	-16713950			953	27	17	41	77	0	0	-16515323		953	27	17	81	68	0	0	-16722905			953	27	17	209	132	0	0	-16711890			953	27	17	66	89	0	0	-16646350
	954	27	18	91	84	0	0	-16515801			954	27	18	41	77	0	0	-16646393		954	27	18	81	68	0	0	-16331496			954	27	18	209	132	0	0	-16646866			954	27	18	66	89	0	0	-16711893
	955	27	19	91	84	0	0	-16122070			955	27	19	41	77	0	0	-16713213		955	27	19	81	68	0	0	-16722391			955	27	19	209	132	0	0	-16712908			955	27	19	66	89	0	0	-16711892
	956	27	20	91	84	0	0	-16386515			956	27	20	41	77	0	0	-16580857		956	27	20	81	68	0	0	-16727264			956	27	20	209	132	0	0	-16517341			956	27	20	66	89	0	0	-16711885
	957	27	21	91	84	0	0	-16517323			957	27	21	41	77	0	0	-16318968		957	27	21	89	70	4.739	0.948	-16646373			957	27	21	209	132	0	0	-16189903			957	27	21	66	89	0	0	-16711873
	958	27	22	91	84	0	0	-16711889			958	27	22	41	77	0	0	-16450042		958	27	22	89	70	0	0	-16122341			958	27	22	209	132	0	0	-15996359			958	27	22	66	89	0	0	-16711875
	959	27	23	91	84	0	0	-16515290			959	27	23	41	77	0	0	-16711927		959	27	23	89	70	0	0	-15599562			959	27	23	209	132	0	0	-16059080			959	27	23	66	89	0	0	-16646337
	960	27	24	91	84	0	0	-16711889			960	27	24	41	77	0	0	-16711925		960	27	24	89	70	0	0	-16332505			960	27	24	211	133	1.28507	0.257014	-16711883			960	27	24	66	89	0	0	-16449721
	961	27	25	90	83	0.813	0.163	-16711899			961	27	25	41	77	0	0	-16711936		961	27	25	89	70	0	0	-15668934			961	27	25	211	133	0	0	-16580807			961	27	25	66	89	0	0	-16713406
	962	27	26	90	83	0	0	-16711902			962	27	26	41	77	0	0	-16646400		962	27	26	89	70	0	0	-16464588			962	27	26	211	133	0	0	-16646349			962	27	26	66	89	0	0	-16712642
	963	27	27	90	83	0	0	-16711906			963	27	27	41	77	0	0	-16711930		963	27	27	89	70	0	0	-16729309			963	27	27	211	133	0	0	-16711897			963	27	27	66	89	0	0	-16712632
	964	27	28	90	83	0	0	-16711907			964	27	28	41	77	0	0	-16711929		964	27	28	89	70	0	0	-16735964			964	27	28	211	133	0	0	-16711886			964	27	28	66	89	0	0	-16711860
	965	27	29	90	83	0	0	-16515294			965	27	29	41	77	0	0	-16711933		965	27	29	89	70	0	0	-16732378			965	27	29	211	133	0	0	-16712659			965	27	29	65	73	9.21314	1.84263	-16449632
	966	27	30	90	83	0	0	-15795660			966	27	30	41	77	0	0	-16711929		966	27	30	89	70	0	0	-16737260			966	27	30	211	133	0	0	-16253121			966	27	30	66	77	2.36955	0.47391	-16581529
	967	27	31	90	83	0	0	-15728843			967	27	31	41	77	0	0	-16711936		967	27	31	89	70	0	0	-16731605			967	27	31	211	135	1.1494	0.22988	-16646347			967	27	31	66	77	0	0	-16580740
	968	27	32	90	83	0	0	-15271106			968	27	32	41	77	0	0	-16711936		968	27	32	93	72	2.57	0.514	-16714196			968	27	32	211	135	0	0	-16334289			968	27	32	66	77	0	0	-16450153
	969	27	33	91	78	2.93	0.586	-16254149			969	27	33	41	77	0	0	-16711928		969	27	33	93	72	0	0	-16712673			969	27	33	211	135	0	0	-16340944			969	27	33	66	77	0	0	-16515677
	970	27	34	91	78	0	0	-16385988			970	27	34	41	77	0	0	-16711927		970	27	34	93	72	0	0	-16722918			970	27	34	211	135	0	0	-16701177			970	27	34	66	77	0	0	-16580703
	971	27	35	91	78	0	0	-16384446			971	27	35	41	77	0	0	-16711933		971	27	35	93	72	0	0	-16723166			971	27	35	194	127	10.7976	2.15953	-16554724			971	27	35	66	77	0	0	-16384111
	972	27	36	91	78	0	0	-16056504			972	27	36	41	77	0	0	-16711925		972	27	36	93	72	0	0	-14683830			972	27	36	197	126	1.81736	0.363472	-16283862			972	27	36	66	77	0	0	-16580730
	973	27	37	91	78	0	0	-16188611			973	28	1	93	179	-1	-1	-16515834		973	28	1	35	94	-1	-1	-16727296			973	28	1	123	68	-1	-1	-16212206			973	28	1	62	67	-1	-1	-16646368
	974	28	1	75	71	-1	-1	-16318708			974	28	2	93	179	0	0	-16058106		974	28	2	30	90	3.68	0.736	-16728576			974	28	2	123	70	1.1494	0.22988	-15926752			974	28	2	61	66	0.812749	0.16255	-16646353
	975	28	2	76	73	1.285	0.257	-16581107			975	28	3	93	179	0	0	-15794663		975	28	3	29	87	1.817	0.363	-15270111			975	28	3	123	70	0	0	-16187626			975	28	3	61	66	0	0	-16647634
	976	28	3	76	73	0	0	-16580864			976	28	4	93	179	0	0	-16454643		976	28	4	29	87	0	0	-16724732			976	28	4	123	70	0	0	-16318692			976	28	4	61	66	0	0	-16712152
	977	28	4	76	73	0	0	-16712446			977	28	5	90	179	1.724	0.345	-16056549		977	28	5	29	87	0	0	-16729827			977	28	5	123	70	0	0	-16253155			977	28	5	61	66	0	0	-16188878
	978	28	5	79	70	2.438	0.488	-16188649			978	28	6	89	178	0.813	0.163	-16580825		978	28	6	31	80	4.184	0.837	-16726245			978	28	6	123	70	0	0	-15991008			978	28	6	66	72	4.48855	0.89771	-16450008
	979	28	6	79	70	0	0	-16711936			979	28	7	89	178	0	0	-16515294		979	28	7	31	80	0	0	-16649174			979	28	7	123	70	0	0	-16721125			979	28	7	66	72	0	0	-16711902
	980	28	7	79	70	0	0	-16647680			980	28	8	89	178	0	0	-16712667		980	28	8	31	80	0	0	-16714470			980	28	8	123	70	0	0	-16724472			980	28	8	66	72	0	0	-16711881
	981	28	8	79	70	0	0	-16536305			981	28	9	89	178	0	0	-16520159		981	28	9	36	74	4.489	0.898	-16254954			981	28	9	123	70	0	0	-15823077			981	28	9	66	72	0	0	-16711875
	982	28	9	79	70	0	0	-16757504			982	28	10	90	168	5.776	1.155	-16711924		982	28	10	36	74	0	0	-16711919			982	28	10	115	74	5.14027	1.02805	-16610537			982	28	10	66	72	0	0	-16711888
	983	28	10	86	70	4.023	0.805	-16713717			983	28	11	90	168	0	0	-16711917		983	28	11	36	74	0	0	-16384224			983	28	11	114	74	0.5747	0.11494	-16746488			983	28	11	66	72	0	0	-16711878
	984	28	11	86	70	0	0	-15859957			984	28	12	90	168	0	0	-16711914		984	28	12	36	74	0	0	-16711894			984	28	12	114	74	0	0	-16756986			984	28	12	66	72	0	0	-16711889
	985	28	12	86	70	0	0	-16516096			985	28	13	92	160	4.739	0.948	-16717482		985	28	13	38	76	1.625	0.325	-16711907			985	28	13	115	80	3.49576	0.699153	-16746490			985	28	13	66	72	0	0	-16711869
	986	28	13	86	70	0	0	-16711936			986	28	14	92	160	0	0	-16723119		986	28	14	38	76	0	0	-16711890			986	28	14	116	86	3.49576	0.699153	-16542175			986	28	14	66	72	0	0	-16449717
	987	28	14	86	70	0	0	-16711936			987	28	15	92	160	0	0	-16737476		987	28	15	38	76	0	0	-16515266			987	28	15	122	92	4.87649	0.975298	-15617490			987	28	15	66	72	0	0	-16712882
	988	28	15	86	70	0	0	-16318716			988	28	16	90	144	9.267	1.853	-16122100		988	28	16	38	76	0	0	-16715217			988	28	16	126	100	5.14027	1.02805	-16742621			988	28	16	66	72	0	0	-16187819
	989	28	16	86	70	0	0	-15991007			989	28	17	90	144	0	0	-16711936		989	28	17	40	76	1.149	0.23	-16711896			989	28	17	126	100	0	0	-16740556			989	28	17	66	72	0	0	-16646320
	990	28	17	86	70	0	0	-15993574			990	28	18	90	144	0	0	-16712704		990	28	18	40	76	0	0	-16711884			990	28	18	126	100	0	0	-16408771			990	28	18	70	74	2.57014	0.514027	-16711881
	991	28	18	86	70	0	0	-16711929			991	28	19	90	144	0	0	-16711928		991	28	19	40	76	0	0	-15728826			991	28	19	126	100	0	0	-16145866			991	28	19	70	74	0	0	-16122557
	992	28	19	86	70	0	0	-16580851			992	28	20	90	144	0	0	-16711932		992	28	20	40	76	0	0	-15732652			992	28	20	126	100	0	0	-16732881			992	28	20	70	74	0	0	-16318894
	993	28	20	86	70	0	0	-16464874			993	28	21	90	144	0	0	-16712960		993	28	21	45	76	2.873	0.575	-16711882			993	28	21	126	100	0	0	-16737748			993	28	21	70	74	0	0	-16711859
	994	28	21	86	70	0	0	-15212263			994	28	22	90	144	0	0	-16580845		994	28	22	45	76	0	0	-16646326			994	28	22	126	100	0	0	-16742624			994	28	22	70	74	0	0	-16711857
	995	28	22	86	70	0	0	-15600087			995	28	23	90	144	0	0	-16716288		995	28	23	45	76	0	0	-16711868			995	28	23	126	100	0	0	-16764656			995	28	23	70	74	0	0	-16253120
	996	28	23	86	73	1.724	0.345	-16711927			996	28	24	90	144	0	0	-16727036		996	28	24	45	76	0	0	-16711865			996	28	24	114	105	7.4711	1.49422	-16746736			996	28	24	70	74	0	0	-16711872
	997	28	24	86	73	0	0	-16712179			997	28	25	78	137	7.984	1.597	-16735453		997	28	25	45	76	0	0	-16713406			997	28	25	115	113	4.63338	0.926676	-16733120			997	28	25	70	74	0	0	-16711874
	998	28	25	86	73	0	0	-16711927			998	28	26	78	137	0	0	-16142802		998	28	26	45	76	0	0	-16648364			998	28	26	111	120	4.63338	0.926676	-16769263			998	28	26	70	74	0	0	-16711880
	999	28	26	86	73	0	0	-15600600			999	28	27	69	134	5.452	1.09	-16726536		999	28	27	45	76	0	0	-15992475			999	28	27	110	114	3.49576	0.699153	-16629995			999	28	27	70	74	0	0	-16515257
	1000	28	27	86	73	0	0	-15533803			1000	28	28	69	121	7.471	1.494	-15865288		1000	28	28	51	78	3.635	0.727	-16647107			1000	28	28	110	114	0	0	-16759780			1000	28	28	70	74	0	0	-16711878
	1001	28	28	86	78	2.873	0.575	-16515321			1001	28	29	68	114	4.064	0.813	-16594632		1001	28	29	51	78	0	0	-16187565			1001	28	29	110	114	0	0	-15673261			1001	28	29	70	74	0	0	-16058553
	1002	28	29	86	78	0	0	-16711929			1002	28	30	68	114	0	0	-16729812		1002	28	30	51	78	0	0	-16515260			1002	28	30	110	114	0	0	-15408800			1002	28	30	70	74	0	0	-15990968
	1003	28	30	86	78	0	0	-16515306			1003	28	31	68	114	0	0	-16717244		1003	28	31	51	78	0	0	-16320947			1003	28	31	110	114	0	0	-16749219			1003	28	31	70	74	0	0	-16711874
	1004	28	31	86	78	0	0	-16712686			1004	28	32	68	114	0	0	-16646330		1004	28	32	51	78	0	0	-16713134			1004	28	32	110	114	0	0	-16764140			1004	28	32	70	74	0	0	-16711881
	1005	28	32	86	78	0	0	-16516335			1005	28	33	68	114	0	0	-16581051		1005	28	33	52	76	1.285	0.257	-16711870			1005	28	33	98	112	6.99153	1.39831	-16713088			1005	28	33	70	74	0	0	-16711867
	1006	28	33	86	78	0	0	-16711924			1006	28	34	68	114	0	0	-16384165		1006	28	34	52	76	0	0	-16712400			1006	28	34	98	112	0	0	-16646294			1006	28	34	70	74	0	0	-16711864
	1007	28	34	86	78	0	0	-16711920			1007	28	35	68	114	0	0	-16711861		1007	28	35	57	74	3.095	0.619	-16712401			1007	28	35	98	112	0	0	-16712331			1007	28	35	70	74	0	0	-16711883
	1008	28	35	86	78	0	0	-16711906			1008	28	36	68	114	0	0	-16714431		1008	28	36	57	74	0	0	-16714206			1008	28	36	98	112	0	0	-16449683			1008	28	36	70	74	0	0	-16711882
	1009	28	36	86	78	0	0	-16711896			1009	29	1	179	86	-1	-1	-16711933		1009	29	1	87	88	-1	-1	-15992060			1009	29	1	63	54	-1	-1	-16711931			1009	29	1	81	54	-1	-1	-16711909
	1010	29	1	123	114	-1	-1	-16319718			1010	29	2	175	84	2.57	0.514	-16772864		1010	29	2	90	82	3.855	0.771	-16646394			1010	29	2	66	53	1.81736	0.363472	-16188148			1010	29	2	78	43	6.55259	1.31052	-16713188
	1011	29	2	122	108	3.496	0.699	-16581610			1011	29	3	196	77	12.722	2.544	-16449774		1011	29	3	84	79	3.855	0.771	-16711936			1011	29	3	69	51	2.07211	0.414422	-16188384			1011	29	3	87	47	5.66014	1.13203	-16646348
	1012	29	3	123	107	0.813	0.163	-16711929			1012	29	4	196	77	0	0	-16711925		1012	29	4	84	79	0	0	-16712192			1012	29	4	69	51	0	0	-16711904			1012	29	4	87	47	0	0	-16711894
	1013	29	4	123	107	0	0	-16712180			1013	29	5	196	77	0	0	-16255733		1013	29	5	84	79	0	0	-16711936			1013	29	5	69	51	0	0	-15927520			1013	29	5	87	47	0	0	-16711888
	1014	29	5	123	107	0	0	-16581628			1014	29	6	204	78	4.633	0.927	-16711928		1014	29	6	84	79	0	0	-16581376			1014	29	6	69	53	1.1494	0.22988	-15993065			1014	29	6	87	47	0	0	-16712139
	1015	29	6	123	107	0	0	-15600874			1015	29	7	204	78	0	0	-16711925		1015	29	7	84	79	0	0	-16712702			1015	29	7	69	53	0	0	-16711915			1015	29	7	87	47	0	0	-15926718
	1016	29	7	127	102	3.68	0.736	-16711930			1016	29	8	199	68	6.425	1.285	-16713469		1016	29	8	84	79	0	0	-16385788			1016	29	8	69	53	0	0	-16134628			1016	29	8	87	47	0	0	-15728823
	1017	29	8	127	102	0	0	-16711930			1017	29	9	190	65	5.452	1.09	-16712950		1017	29	9	82	79	1.149	0.23	-16712188			1017	29	9	72	52	1.81736	0.363472	-16404709			1017	29	9	85	51	2.57014	0.514027	-16711863
	1018	29	9	127	102	0	0	-16711915			1018	29	10	184	63	3.635	0.727	-16717817		1018	29	10	80	77	1.625	0.325	-16711935			1018	29	10	63	50	5.29847	1.05969	-16736993			1018	29	10	85	51	0	0	-16451009
	1019	29	10	127	96	3.448	0.69	-16711929			1019	29	11	184	63	0	0	-15218666		1019	29	11	80	77	0	0	-16711930			1019	29	11	66	51	1.81736	0.363472	-16529108			1019	29	11	85	51	0	0	-16711869
	1020	29	11	127	96	0	0	-16711917			1020	29	12	173	57	7.201	1.44	-16526078		1020	29	12	80	77	0	0	-16646397			1020	29	12	66	51	0	0	-15944408			1020	29	12	85	51	0	0	-16711876
	1021	29	12	127	96	0	0	-14752213			1021	29	13	173	57	0	0	-16724992		1021	29	13	80	77	0	0	-16712188			1021	29	13	66	51	0	0	-16280283			1021	29	13	85	51	0	0	-15928009
	1022	29	13	127	90	3.448	0.69	-16711920			1022	29	14	173	57	0	0	-16723456		1022	29	14	80	77	0	0	-16712955			1022	29	14	64	57	3.63472	0.726944	-16742119			1022	29	14	85	51	0	0	-15999192
	1023	29	14	127	90	0	0	-16647658			1023	29	15	173	61	2.299	0.46	-15402979		1023	29	15	80	77	0	0	-16711929			1023	29	15	64	57	0	0	-16545775			1023	29	15	86	59	4.63338	0.926676	-16711894
	1024	29	15	127	90	0	0	-16388332			1024	29	16	173	61	0	0	-15601126		1024	29	16	80	77	0	0	-16515832			1024	29	16	64	57	0	0	-16743908			1024	29	16	86	59	0	0	-16711888
	1025	29	16	127	90	0	0	-15599067			1025	29	17	173	61	0	0	-16134893		1025	29	17	80	77	0	0	-16581361			1025	29	17	64	57	0	0	-16742376			1025	29	17	86	59	0	0	-16711883
	1026	29	17	124	90	1.724	0.345	-16254944			1026	29	18	173	61	0	0	-16542452		1026	29	18	80	77	0	0	-16516086			1026	29	18	64	57	0	0	-16414175			1026	29	18	86	59	0	0	-16711887
	1027	29	18	124	90	0	0	-15730654			1027	29	19	160	54	8.485	1.697	-15929824		1027	29	19	80	77	0	0	-15991280			1027	29	19	64	57	0	0	-16742360			1027	29	19	86	59	0	0	-16187847
	1028	29	19	124	90	0	0	-14945742			1028	29	20	160	54	0	0	-15274204		1028	29	20	80	75	1.149	0.23	-16711927			1028	29	20	64	57	0	0	-16741603			1028	29	20	86	59	0	0	-15993030
	1029	29	20	124	90	0	0	-15992026			1029	29	21	160	54	0	0	-13065415		1029	29	21	80	75	0	0	-16711932			1029	29	21	64	57	0	0	-16744410			1029	29	21	86	59	0	0	-15992010
	1030	29	21	123	88	1.285	0.257	-16711909			1030	29	22	144	46	10.281	2.056	-16753920		1030	29	22	80	75	0	0	-16646389			1030	29	22	64	57	0	0	-16548566			1030	29	22	86	59	0	0	-15731397
	1031	29	22	123	88	0	0	-16711913			1031	29	23	143	35	6.348	1.27	-16263383		1031	29	23	80	75	0	0	-16711925			1031	29	23	64	57	0	0	-16616150			1031	29	23	86	59	0	0	-15666131
	1032	29	23	123	88	0	0	-16711903			1032	29	24	143	35	0	0	-16412906		1032	29	24	80	75	0	0	-16711923			1032	29	24	64	57	0	0	-16746210			1032	29	24	86	59	0	0	-15863496
	1033	29	24	123	88	0	0	-16711915			1033	29	25	125	35	10.345	2.069	-16729331		1033	29	25	80	75	0	0	-16711928			1033	29	25	64	57	0	0	-16279244			1033	29	25	86	59	0	0	-16187587
	1034	29	25	123	88	0	0	-16449754			1034	29	26	117	33	4.739	0.948	-15802855		1034	29	26	80	75	0	0	-16711924			1034	29	26	64	57	0	0	-16545237			1034	29	26	86	59	0	0	-15993040
	1035	29	26	123	88	0	0	-16712160			1035	29	27	117	33	0	0	-16654049		1035	29	27	80	75	0	0	-16254193			1035	29	27	65	57	0.5747	0.11494	-16343513			1035	29	27	86	59	0	0	-15730643
	1036	29	27	127	85	2.873	0.575	-16580818			1036	29	28	117	33	0	0	-16721391		1036	29	28	80	75	0	0	-16711905			1036	29	28	65	57	0	0	-16535500			1036	29	28	86	59	0	0	-15667906
	1037	29	28	127	85	0	0	-16711895			1037	29	29	117	33	0	0	-16129503		1037	29	29	80	75	0	0	-16711918			1037	29	29	65	57	0	0	-16734669			1037	29	29	86	59	0	0	-15535799
	1038	29	29	127	85	0	0	-16646355			1038	29	30	117	33	0	0	-16393950		1038	29	30	80	75	0	0	-16711905			1038	29	30	54	67	8.54353	1.70871	-16552406			1038	29	30	87	66	4.06374	0.812749	-16585705
	1039	29	30	127	85	0	0	-16711899			1039	29	31	117	33	0	0	-16726508		1039	29	31	80	75	0	0	-16711900			1039	29	31	50	74	4.63338	0.926676	-16751563			1039	29	31	87	66	0	0	-16582615
	1040	29	31	127	85	0	0	-16711895			1040	29	32	117	33	0	0	-16726246		1040	29	32	82	76	1.285	0.257	-16711892			1040	29	32	47	81	4.37678	0.875357	-16746824			1040	29	32	87	66	0	0	-16711876
	1041	29	32	127	85	0	0	-16711899			1041	29	33	117	33	0	0	-16728020		1041	29	33	82	76	0	0	-16711900			1041	29	33	43	84	2.8735	0.5747	-15757649			1041	29	33	87	66	0	0	-16581049
	1042	29	33	130	84	1.817	0.363	-16711884			1042	29	34	117	33	0	0	-16663004		1042	29	34	82	76	0	0	-16711883			1042	29	34	55	97	10.1675	2.0335	-16753623			1042	29	34	87	66	0	0	-16188340
	1043	29	34	130	84	0	0	-16711875			1043	29	35	117	33	0	0	-16742654		1043	29	35	82	76	0	0	-16646351			1043	29	35	59	96	2.36955	0.47391	-16747211			1043	29	35	87	66	0	0	-16384438
	1044	29	35	130	84	0	0	-16253365			1044	29	36	127	39	6.702	1.34	-15476936		1044	29	36	82	76	0	0	-16711878			1044	29	36	60	94	1.28507	0.257014	-16609218			1044	29	36	87	66	0	0	-15925423
	1045	29	36	126	80	3.251	0.65	-16713400			1045	30	1	112	55	-1	-1	-16711934		1045	30	1	115	149	-1	-1	-15471521			1045	30	1	100	89	-1	-1	-15474647			1045	30	1	29	72	-1	-1	-16711929
	1046	30	1	105	161	-1	-1	-16711924			1046	30	2	110	51	2.57	0.514	-16516086		1046	30	2	115	149	0	0	-15866304			1046	30	2	100	94	2.8735	0.5747	-16189924			1046	30	2	31	70	1.6255	0.325099	-16711919
	1047	30	2	105	161	0	0	-16713214			1047	30	3	105	46	4.064	0.813	-16318720		1047	30	3	115	149	0	0	-15345101			1047	30	3	97	93	1.81736	0.363472	-16270566			1047	30	3	31	70	0	0	-16711911
	1048	30	3	105	161	0	0	-16712192			1048	30	4	105	46	0	0	-16711936		1048	30	4	115	149	0	0	-16407784			1048	30	4	99	99	3.63472	0.726944	-16068055			1048	30	4	31	70	0	0	-16646357
	1049	30	4	110	157	3.68	0.736	-16711914			1049	30	5	105	46	0	0	-16718336		1049	30	5	111	149	2.299	0.46	-15216525			1049	30	5	99	99	0	0	-16197336			1049	30	5	31	70	0	0	-16711891
	1050	30	5	110	157	0	0	-16711907			1050	30	6	97	38	6.502	1.3	-16711936		1050	30	6	111	149	0	0	-15683498			1050	30	6	99	99	0	0	-16524243			1050	30	6	31	70	0	0	-16712661
	1051	30	6	110	157	0	0	-15992034			1051	30	7	97	38	0	0	-16580864		1051	30	7	111	149	0	0	-16011182			1051	30	7	99	99	0	0	-16002501			1051	30	7	37	75	4.48855	0.89771	-16582890
	1052	30	7	110	157	0	0	-16712691			1052	30	8	88	35	5.452	1.09	-16729088		1052	30	8	111	149	0	0	-16736960			1052	30	8	99	99	0	0	-16079301			1052	30	8	37	75	0	0	-16711906
	1053	30	8	110	157	0	0	-16516597			1053	30	9	90	35	1.149	0.23	-16721152		1053	30	9	111	149	0	0	-16602803			1053	30	9	102	109	6.00004	1.20001	-16732132			1053	30	9	37	75	0	0	-16711896
	1054	30	9	110	157	0	0	-16711920			1054	30	10	87	33	2.072	0.414	-16716800		1054	30	10	107	150	2.37	0.474	-16734158			1054	30	10	113	116	7.49317	1.49863	-16616946			1054	30	10	37	75	0	0	-15599568
	1055	30	10	116	154	3.855	0.771	-16711907			1055	30	11	87	33	0	0	-15544298		1055	30	11	107	150	0	0	-16735691			1055	30	11	113	116	0	0	-16741874			1055	30	11	37	75	0	0	-15600320
	1056	30	11	116	154	0	0	-16580836			1056	30	12	93	37	4.144	0.829	-16712447		1056	30	12	107	150	0	0	-16608967			1056	30	12	113	116	0	0	-16732134			1056	30	12	37	75	0	0	-15275698
	1057	30	12	116	154	0	0	-16712423			1057	30	13	93	37	0	0	-16384256		1057	30	13	107	150	0	0	-16748757			1057	30	13	113	116	0	0	-16274391			1057	30	13	43	71	4.14422	0.828844	-15925738
	1058	30	13	116	154	0	0	-16711921			1058	30	14	93	37	0	0	-16384759		1058	30	14	107	150	0	0	-15636662			1058	30	14	113	116	0	0	-16603353			1058	30	14	43	71	0	0	-16711894
	1059	30	14	116	154	0	0	-16712433			1059	30	15	93	37	0	0	-16713470		1059	30	15	107	150	0	0	-16757464			1059	30	15	113	116	0	0	-16736721			1059	30	15	43	71	0	0	-16712409
	1060	30	15	116	154	0	0	-16711915			1060	30	16	83	49	8.977	1.795	-16515258		1060	30	16	107	150	0	0	-16757464			1060	30	16	113	116	0	0	-16093146			1060	30	16	43	71	0	0	-16711884
	1061	30	16	116	154	0	0	-16711914			1061	30	17	83	49	0	0	-16711858		1061	30	17	107	150	0	0	-16759008			1061	30	17	114	124	4.63338	0.926676	-16535767			1061	30	17	43	71	0	0	-16581841
	1062	30	17	116	154	0	0	-16711926			1062	30	18	82	59	5.776	1.155	-16384725		1062	30	18	107	150	0	0	-16758747			1062	30	18	113	123	0.812749	0.16255	-16733141			1062	30	18	43	71	0	0	-16580806
	1063	30	18	116	154	0	0	-16711916			1063	30	19	82	59	0	0	-16711887		1063	30	19	107	150	0	0	-16757974			1063	30	19	113	123	0	0	-16735964			1063	30	19	43	71	0	0	-16253883
	1064	30	19	116	154	0	0	-16515306			1064	30	20	82	59	0	0	-16450014		1064	30	20	107	150	0	0	-16760289			1064	30	20	113	123	0	0	-16742613			1064	30	20	43	71	0	0	-15927747
	1065	30	20	116	154	0	0	-16711925			1065	30	21	82	59	0	0	-16724211		1065	30	21	113	150	3.448	0.69	-16485031			1065	30	21	113	123	0	0	-16746465			1065	30	21	43	71	0	0	-15991733
	1066	30	21	114	154	1.149	0.23	-16711899			1066	30	22	82	59	0	0	-16745472		1066	30	22	113	150	0	0	-15894679			1066	30	22	114	131	4.63338	0.926676	-16549344			1066	30	22	43	71	0	0	-15730617
	1067	30	22	114	154	0	0	-16711910			1067	30	23	85	65	3.855	0.771	-16712656		1067	30	23	113	150	0	0	-16092064			1067	30	23	114	131	0	0	-16680154			1067	30	23	43	71	0	0	-16058294
	1068	30	23	114	154	0	0	-16711923			1068	30	24	85	65	0	0	-15603431		1068	30	24	113	150	0	0	-15633562			1068	30	24	114	131	0	0	-16484315			1068	30	24	48	75	3.67988	0.735975	-16711902
	1069	30	24	114	154	0	0	-16711908			1069	30	25	85	65	0	0	-16735483		1069	30	25	113	150	0	0	-16154001			1069	30	25	114	131	0	0	-16748508			1069	30	25	48	75	0	0	-16711901
	1070	30	25	114	154	0	0	-16711903			1070	30	26	88	65	1.724	0.345	-15863267		1070	30	26	113	150	0	0	-16222361			1070	30	26	114	131	0	0	-16487393			1070	30	26	48	75	0	0	-16712401
	1071	30	26	117	153	1.817	0.363	-16711862			1071	30	27	88	65	0	0	-16732918		1071	30	27	113	150	0	0	-16093594			1071	30	27	114	131	0	0	-16752106			1071	30	27	48	75	0	0	-16712154
	1072	30	27	117	153	0	0	-16059331			1072	30	28	93	66	2.93	0.586	-16712640		1072	30	28	113	150	0	0	-16749735			1072	30	28	118	132	2.36955	0.47391	-16343998			1072	30	28	48	75	0	0	-16711887
	1073	30	28	117	153	0	0	-15731112			1073	30	29	93	66	0	0	-16187595		1073	30	29	113	150	0	0	-16093596			1073	30	29	118	132	0	0	-16472509			1073	30	29	48	75	0	0	-16711873
	1074	30	29	117	153	0	0	-15797942			1074	30	30	93	66	0	0	-16718308		1074	30	30	113	150	0	0	-15565202			1074	30	30	118	132	0	0	-16605887			1074	30	30	48	75	0	0	-16711890
	1075	30	30	117	153	0	0	-16713147			1075	30	31	98	67	2.93	0.586	-15073395		1075	30	31	113	150	0	0	-16750246			1075	30	31	118	132	0	0	-16737729			1075	30	31	48	75	0	0	-16712134
	1076	30	31	117	153	0	0	-16189136			1076	30	32	98	67	0	0	-16720787		1076	30	32	113	150	0	0	-16749226			1076	30	32	118	132	0	0	-16473533			1076	30	32	48	75	0	0	-16711867
	1077	30	32	117	153	0	0	-16712395			1077	30	33	98	67	0	0	-15804048		1077	30	33	113	150	0	0	-16357033			1077	30	33	118	132	0	0	-15757771			1077	30	33	48	75	0	0	-16711867
	1078	30	33	117	153	0	0	-16255429			1078	30	34	98	67	0	0	-14635142		1078	30	34	113	150	0	0	-16751273			1078	30	34	112	137	4.48855	0.89771	-15888834			1078	30	34	48	75	0	0	-16712634
	1079	30	34	117	153	0	0	-16385200			1079	30	35	98	67	0	0	-16740539		1079	30	35	113	150	0	0	-16759211			1079	30	35	110	149	6.99153	1.39831	-16551889			1079	30	35	48	75	0	0	-16712637
	1080	30	35	117	153	0	0	-15859909			1080	30	36	101	62	3.351	0.67	-16060087		1080	30	36	113	150	0	0	-16758964			1080	30	36	104	155	4.87649	0.975298	-16604867			1080	30	36	48	75	0	0	-16711854
	1081	30	36	117	153	0	0	-16711884			1081	30	37	101	62	0	0	-16541911		1081	31	1	45	33	-1	-1	-16711913													1081	31	1	40	63	-1	-1	-16580854
																				1082	31	2	40	33	2.8735	0.5747	-16254947													1082	31	2	40	63	0	0	-16711936
																				1083	31	3	50	34	5.77566	1.15513	-16711928													1083	31	3	40	63	0	0	-16711936
																				1084	31	4	47	34	1.7241	0.34482	-16254177													1084	31	4	40	63	0	0	-16711936
																				1085	31	5	47	34	0	0	-16384235													1085	31	5	40	63	0	0	-16711936
																				1086	31	6	47	34	0	0	-16711894													1086	31	6	40	63	0	0	-16711935
																				1087	31	7	47	34	0	0	-16318685													1087	31	7	40	63	0	0	-16711936
																				1088	31	8	46	40	3.49576	0.699153	-15990999													1088	31	8	40	63	0	0	-16711935
																				1089	31	9	45	37	1.81736	0.363472	-16319985													1089	31	9	40	63	0	0	-16711936
																				1090	31	10	45	37	0	0	-16711913													1090	31	10	40	63	0	0	-16711926
																				1091	31	11	45	37	0	0	-16449767													1091	31	11	40	63	0	0	-16711933
																				1092	31	12	45	37	0	0	-16188148													1092	31	12	40	63	0	0	-16713460
																				1093	31	13	45	37	0	0	-16452082													1093	31	13	40	63	0	0	-16711931
																				1094	31	14	45	37	0	0	-16386030													1094	31	14	37	62	1.817	0.363	-16384226
																				1095	31	15	45	37	0	0	-16718321													1095	31	15	37	62	0	0	-16711912
																				1096	31	16	45	37	0	0	-16056533													1096	31	16	37	62	0	0	-16515314
																				1097	31	17	45	37	0	0	-16125912													1097	31	17	37	62	0	0	-16712191
																				1098	31	18	45	37	0	0	-16722915													1098	31	18	37	62	0	0	-16711931
																				1099	31	19	45	37	0	0	-16722410													1099	31	19	37	62	0	0	-16711933
																				1100	31	20	45	37	0	0	-16256998													1100	31	20	37	62	0	0	-16646393
																				1101	31	21	45	37	0	0	-16711914													1101	31	21	37	62	0	0	-16712183
																				1102	31	22	45	37	0	0	-16384239													1102	31	22	37	62	0	0	-16712429
																				1103	31	23	45	37	0	0	-16122097													1103	31	23	37	62	0	0	-16450041
																				1104	31	24	45	37	0	0	-16711932													1104	31	24	35	58	2.57	0.514	-16722432
																				1105	31	25	45	37	0	0	-16648960													1105	31	25	35	58	0	0	-16716030
																				1106	31	26	45	37	0	0	-16384235													1106	31	26	35	58	0	0	-16719104
																				1107	31	27	45	37	0	0	-16711916													1107	31	27	35	58	0	0	-16722176
																				1108	31	28	45	37	0	0	-16385262													1108	31	28	35	58	0	0	-16716274
																				1109	31	29	45	37	0	0	-16384256													1109	31	29	35	58	0	0	-16719616
																				1110	31	30	45	37	0	0	-16711935													1110	31	30	35	58	0	0	-16718592
																				1111	31	31	45	37	0	0	-16711933													1111	31	31	35	58	0	0	-16255970
																				1112	31	32	45	37	0	0	-16581374													1112	31	32	35	58	0	0	-16719350
																				1113	31	33	45	37	0	0	-16714741													1113	31	33	35	58	0	0	-16719863
																				1114	31	34	49	35	2.57014	0.514027	-15929060													1114	31	34	35	58	0	0	-16724736
																				1115	31	35	49	35	0	0	-16060899													1115	31	35	35	58	0	0	-16725504
																				1116	31	36	49	35	0	0	-15868910													1116	31	36	37	48	5.861	1.172	-16723197
																				1117	32	1	22	34	-1	-1	-16711914													1117	32	1	37	63	-1	-1	-16450265
																				1118	32	2	23	35	0.812749	0.16255	-16582882													1118	32	2	36	68	2.93041	0.586081	-16126155
																				1119	32	3	23	35	0	0	-16711897													1119	32	3	38	60	4.7391	0.94782	-16711903
																				1120	32	4	23	35	0	0	-16712417													1120	32	4	38	63	1.7241	0.34482	-16711902
																				1121	32	5	23	35	0	0	-16646367													1121	32	5	38	63	0	0	-16712922
																				1122	32	6	23	35	0	0	-16711918													1122	32	6	38	63	0	0	-16711901
																				1123	32	7	23	35	0	0	-16449757													1123	32	7	38	63	0	0	-16711895
																				1124	32	8	23	39	2.2988	0.45976	-16057576													1124	32	8	38	63	0	0	-16582613
																				1125	32	9	23	39	0	0	-16450508													1125	32	9	38	63	0	0	-16716526
																				1126	32	10	23	39	0	0	-15993299													1126	32	10	38	63	0	0	-16715507
																				1127	32	11	23	39	0	0	-16711879													1127	32	11	38	63	0	0	-16716010
																				1128	32	12	23	39	0	0	-16254892													1128	32	12	38	63	0	0	-16391671
																				1129	32	13	23	39	0	0	-16714686													1129	32	13	38	63	0	0	-16131055
																				1130	32	14	23	43	2.2988	0.45976	-16712394													1130	32	14	38	63	0	0	-15995365
																				1131	32	15	23	43	0	0	-16711880													1131	32	15	38	63	0	0	-16658165
																				1132	32	16	23	43	0	0	-16711888													1132	32	16	38	63	0	0	-15932134
																				1133	32	17	25	46	2.07211	0.414422	-16711869													1133	32	17	38	63	0	0	-16656611
																				1134	32	18	29	46	2.2988	0.45976	-16666792													1134	32	18	38	63	0	0	-16461799
																				1135	32	19	29	46	0	0	-16732859													1135	32	19	38	63	0	0	-15866339
																				1136	32	20	29	46	0	0	-15940510													1136	32	20	38	63	0	0	-15866844
																				1137	32	21	29	46	0	0	-16728484													1137	32	21	38	63	0	0	-16717798
																				1138	32	22	29	46	0	0	-16728218													1138	32	22	38	63	0	0	-16727029
																				1139	32	23	29	46	0	0	-16733342													1139	32	23	38	63	0	0	-16721374
																				1140	32	24	29	46	0	0	-16601749													1140	32	24	38	63	0	0	-16524764
																				1141	32	25	32	48	2.07211	0.414422	-16737186													1141	32	25	38	63	0	0	-16724210
																				1142	32	26	32	48	0	0	-15553929													1142	32	26	38	69	3.4482	0.68964	-16319970
																				1143	32	27	32	48	0	0	-16470670													1143	32	27	38	68	0.5747	0.11494	-15859935
																				1144	32	28	32	48	0	0	-16726164													1144	32	28	38	68	0	0	-16384227
																				1145	32	29	32	48	0	0	-16735378													1145	32	29	38	68	0	0	-16318958
																				1146	32	30	32	48	0	0	-16735122													1146	32	30	38	68	0	0	-16386030
																				1147	32	31	32	48	0	0	-16741529													1147	32	31	38	68	0	0	-16386289
																				1148	32	32	32	48	0	0	-16407177													1148	32	32	38	68	0	0	-15597785
																				1149	32	33	32	48	0	0	-16672148													1149	32	33	38	68	0	0	-16450542
																				1150	32	34	32	48	0	0	-16736656													1150	32	34	38	68	0	0	-16254192
																				1151	32	35	32	48	0	0	-16735125													1151	32	35	38	68	0	0	-16516840
																				1152	32	36	32	48	0	0	-16738201													1152	32	36	38	68	0	0	-16453085
																				1153	33	1	54	59	-1	-1	-16711909													1153	33	1	43	38	-1	-1	-16729557
																				1154	33	2	54	59	0	0	-16646365													1154	33	2	39	35	2.8735	0.5747	-16730074
																				1155	33	3	54	59	0	0	-16384983													1155	33	3	39	35	0	0	-16732134
																				1156	33	4	54	59	0	0	-16712398													1156	33	4	39	35	0	0	-16731883
																				1157	33	5	54	59	0	0	-16711884													1157	33	5	39	35	0	0	-16730857
																				1158	33	6	54	59	0	0	-16711852													1158	33	6	39	35	0	0	-16727014
																				1159	33	7	54	59	0	0	-16712366													1159	33	7	39	35	0	0	-16724185
																				1160	33	8	54	59	0	0	-16713380													1160	33	8	39	35	0	0	-16728039
																				1161	33	9	54	59	0	0	-16711831													1161	33	9	39	35	0	0	-16329427
																				1162	33	10	54	59	0	0	-16716446													1162	33	10	41	39	2.57014	0.514027	-16722160
																				1163	33	11	54	59	0	0	-16253303													1163	33	11	41	39	0	0	-16722686
																				1164	33	12	54	51	4.598	0.92	-16712060													1164	33	12	41	39	0	0	-16384215
																				1165	33	13	54	51	0	0	-16711806													1165	33	13	41	39	0	0	-16450768
																				1166	33	14	54	51	0	0	-16711799													1166	33	14	41	39	0	0	-16717797
																				1167	33	15	54	51	0	0	-16712554													1167	33	15	41	39	0	0	-16722674
																				1168	33	16	54	51	0	0	-16713074													1168	33	16	41	39	0	0	-16712408
																				1169	33	17	54	51	0	0	-16121939													1169	33	17	42	43	2.36955	0.47391	-16515288
																				1170	33	18	54	51	0	0	-16449625													1170	33	18	42	43	0	0	-16711893
																				1171	33	19	54	51	0	0	-16319837													1171	33	19	42	43	0	0	-16711887
																				1172	33	20	54	51	0	0	-16712792													1172	33	20	42	43	0	0	-16711885
																				1173	33	21	54	51	0	0	-16712540													1173	33	21	42	43	0	0	-16711900
																				1174	33	22	54	51	0	0	-16516439													1174	33	22	42	43	0	0	-16449733
																				1175	33	23	54	51	0	0	-16713817													1175	33	23	42	43	0	0	-16449740
																				1176	33	24	54	51	0	0	-16713053													1176	33	24	42	43	0	0	-16580813
																				1177	33	25	54	51	0	0	-16516437													1177	33	25	42	43	0	0	-16711886
																				1178	33	26	54	51	0	0	-15599185													1178	33	26	42	43	0	0	-16712387
																				1179	33	27	54	51	0	0	-15927345													1179	33	27	42	43	0	0	-16711876
																				1180	33	28	54	51	0	0	-16122432													1180	33	28	42	43	0	0	-16384948
																				1181	33	29	54	51	0	0	-15335486													1181	33	29	42	43	0	0	-16711870
																				1182	33	30	54	51	0	0	-16714313													1182	33	30	42	43	0	0	-16516273
																				1183	33	31	54	51	0	0	-16123428													1183	33	31	42	43	0	0	-16711851
																				1184	33	32	54	51	0	0	-15861319													1184	33	32	42	43	0	0	-16646314
																				1185	33	33	54	51	0	0	-15794234													1185	33	33	42	43	0	0	-16711837
																				1186	33	34	54	51	0	0	-16059953													1186	33	34	42	43	0	0	-16515233
																				1187	33	35	54	51	0	0	-16057886													1187	33	35	45	44	1.81736	0.363472	-16515974
																				1188	33	36	54	51	0	0	-16189229													1188	33	36	45	44	0	0	-16646277

## Sheet: FIGURE 3b
	PERCENTAGE POPULATION OF HIGH MOBILITY CELLS
		Normal	Sub-clinical	Early Clinical	Advanced
		2.12766	26.6667	39.4737	27.7778
		0	16.129	39.4737	18.3673
		5.88235	27.5862	40.5405	23.8095

## Sheet: FIGURE 3c
	MEAN SPEED	Mkm/min
	Normal	Sub clinical-High motility	Sub clinical-Low motility	Early Clinical-High motility	Early Clinical-Low motiltiy	Advanced-High motiltiy	Advanced-Low motiltiy
	0.0738297	0.156043	0.0940448	0.41546	0.117299	0.204432	0.0860949
	0.111037	0.224349	0.110343	0.250406	0.149434	0.214473	0.089953
	0.0932614	0.217691	0.0714489	0.413188	0.110734	0.243477	0.121994
	0.0894773	0.323822	0.170796	0.206202	0.0649259	0.277098	0.101322
	0.0950437	0.210235	0.100755	0.359008	0.113933	0.401812	0.142544
	0.159568	0.182096	0.100079	0.193393	0.126965	0.23828	0.124041
	0.100018	0.157327	0.0960824	0.190451	0.1062	0.310589	0.0815413
	0.0998102	0.314757	0.110535	0.234595	0.0897824	0.551351	0.115596
	0.106152	0.266957	0.0725495	0.465025	0.123652	0.272893	0.0927037
	0.219866	0.173332	0.0975677	0.304787	0.0769922	0.2656	0.0984029
	0.148898	0.167779	0.101538	0.24946	0.104803	0.520379	0.18646
	0.185125	0.187051	0.0998206	0.271515	0.115009	0.283947	0.138945
	0.184521	0.257483	0.141572	0.187581	0.0850478	0.262425	0.218702
	0.152764	0.333977	0.120712	0.364421	0.0719698	0.27132	0.228415
	0.137767	0.170602	0.0881835	0.291435	0.0716432	0.262139	0.137997
	0.143507	0.190889	0.109965	0.459154	0.121262	0.318767	0.256213
	0.152101	0.232679	0.112483	0.283606	0.079241	0.327968	0.137625
	0.145892	0.195702	0.167779	0.353527	0.079894	0.297458	0.122127
	0.186403	0.240002	0.12372	0.37347	0.101571	0.427146	0.212076
	0.134706	0.348635	0.0952081	0.428535	0.0877126	0.363102	0.191908
	0.162741	0.297337	0.0976052	0.339835	0.102217	0.321333	0.141756
	0.131664	0.179553	0.214091	0.261772	0.119124	0.356548	0.109897
	0.162572	0.27633	0.116213	0.265049	0.116007	0.282109	0.124253
	0.12738	0.15521	0.138335	0.279946	0.122437	0.355615	0.146268
	0.113699	0.304236	0.0870414	0.462188	0.11338	0.341608	0.12341
	0.13806	0.251448	0.103545	0.203232	0.209123	0.457908	0.134485
	0.138863	0.278116	0.152188	0.442342	0.134883	0.436936	0.126489
	0.146502	0.347724	0.113348	0.199728	0.143909	0.397342	0.155193
	0.194887		0.109974	0.404215	0.0908201	0.343196	0.128333
	0.112956				0.0875804	0.411824	0.276907

## Sheet: FIGURE 3d
	TOTAL DISTANCE	(Mkm)
	Normal	Sub clinical-High motility	Sub clinical-Low motility	Early Clinical-High motility	Early Clinical-Low motiltiy	Advanced-High motiltiy	Advanced-Low motiltiy
	12.9202	27.3075	10.3449	72.7055	13.7313	34.7535	15.0666
	19.4315	39.2612	19.31	43.8211	26.151	37.5327	15.7418
	16.3207	53.3644	12.5036	36.1761	19.3785	42.6085	21.349
	15.6585	38.0958	12.8097	36.0854	11.362	50.346	17.7313
	16.6327	56.6688	17.6321	62.8264	19.9383	70.3172	12.02
	14.8123	36.791	17.5138	33.8438	22.2189	41.6991	21.7072
	19.9943	31.8668	16.8144	33.3289	18.5849	54.353	14.2697
	17.4668	27.5322	19.3436	41.0542	15.7119	96.4864	20.2293
	12.0331	40.2107	12.6962	81.3794	11.7469	47.7563	16.2232
	15.3907	46.7175	17.0744	53.3377	13.4736	46.4799	17.2205
	19.1282	43.6554	17.7692	47.5152	18.3405	70.2511	16.4828
	12.9587	30.333	17.4686	32.8267	14.3761	44.8262	24.3154
	15.6843	29.3613	24.7751	63.7736	14.8834	53.1706	15.3091
	16.804	32.7339	21.1246	51.0012	12.5947	47.481	19.4153
	12.399	38.4073	15.4321	69.1286	12.5376	45.2301	24.1496
	12.3785	29.8553	19.2439	90.5941	21.2209	55.7842	24.0844
	13.689	33.4056	19.7118	49.6311	13.8672	57.3944	21.3723
	19.6955	40.7188	29.3613	61.8672	13.9815	52.0551	19.0868
	17.1558	31.8894	14.8464	65.3572	17.7749	74.7505	25.9076
	16.8383	42.0004	16.6614	74.9937	15.3497	63.5428	24.8074
	21.97	61.011	17.0809	59.4712	17.8881	51.4132	19.232
	15.648	52.034	15.4244	45.8101	9.5299	62.3959	21.7443
	19.7729	31.4217	20.3372	43.7331	20.3011	49.3692	25.597
	17.1963	48.3578	20.3213	48.9906	21.4264	62.2326	21.5967
	19.8974	27.1617	10.3751	41.8295	19.8416	59.7814	23.5349
	18.6381	28.9024	9.13935	35.5656	21.958	80.1339	22.1356
	15.3209	44.0033	18.1203	44.2342	23.6044	76.4639	27.1588
	15.3827	48.6703	26.633	34.9524	25.1841	60.2619	22.4583
	19.1842	60.8517	19.8359	36.3794	15.8935	60.0592	23.5371
	19.7674		19.2454	66.453	15.3266	72.0693

[truncated: 11 more sheets: FIGURE 3e, FIG3-S1, FIGURE 6a, FIGURE 6b, FIGURE 6c, FIGURE 6d, FIGURE 7a, FIGURE 7b, FIGURE 8a, Fig8-S1, Figure 9]
