# Supplementary figures and images for: Dissecting surveying behavior of reactive microglia under chronic neurodegeneration
Source: eLife journal article supplement (doi:10.7554/elife.107650), 2025-10-30

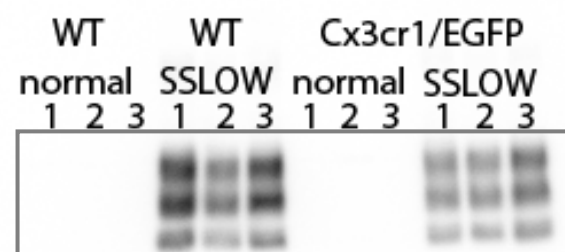

Supplement: fig1-figsupp1-data1 [file FigureS1d-labeled.pdf › FigureS1d-labeled.pdf]

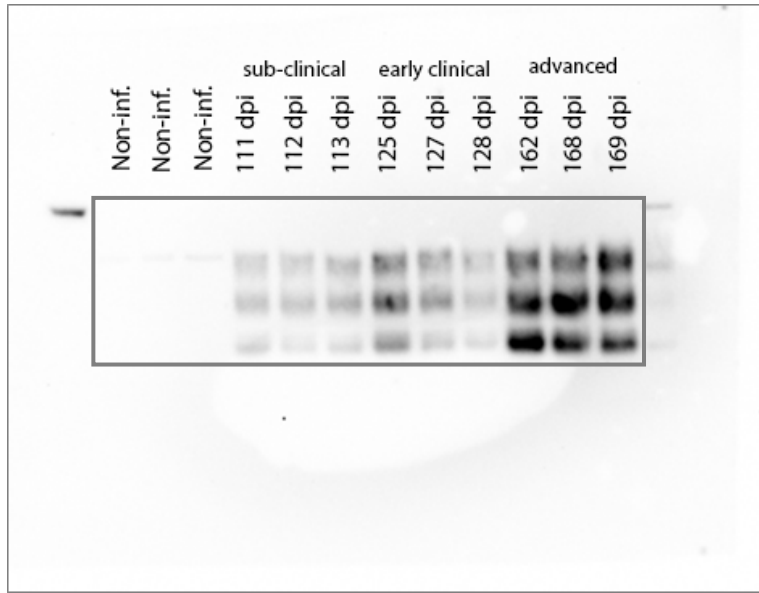

Supplement: fig2-figsupp1-data1 [file FigureS2a-labeled.pdf › FigureS2a-labeled.pdf]
